# Supplementary material
Source: PubMed Central journal article supplement (PMC8553517)
Supplement: NIHMS1750474-supplement-Supplementary_information.pdf [file NIHMS1750474-supplement-Supplementary_information.pdf]

## Supporting Information

### Synthesis and Antileishmanial Evaluation of Arylimidamide-Azole Hybrids Containing a Phenoxyalkyl Linker

Ahmed Abdelhameed,<sup>1,2</sup> Mei Feng,<sup>3</sup> April C. Joice,<sup>1</sup> Emilia M. Zywoot,<sup>1</sup> Yiru Jin,<sup>3</sup> Chris La Rosa,<sup>1</sup> Xiaoping Liao,<sup>1</sup> Heidi L. Meeds,<sup>1</sup> Yena Kim,<sup>1</sup> Junan Li,<sup>4</sup> Craig A. McElroy,<sup>1</sup> Michael Zhuo Wang,<sup>3</sup> and Karl A. Werbovetz\*.<sup>1</sup>

<sup>1</sup>Division of Medicinal Chemistry and Pharmacognosy, College of Pharmacy, The Ohio State University, Columbus, Ohio 43210, USA

<sup>2</sup>Pharmaceutical Chemistry Department, Faculty of Pharmacy, Helwan University, Cairo, Egypt

<sup>3</sup>Department of Pharmaceutical Chemistry, School of Pharmacy, University of Kansas, Lawrence, Kansas 66047, USA

<sup>4</sup>College of Pharmacy, The Ohio State University, Columbus, Ohio 43210, USA

#### Table of Contents

|                                                                                                      |         |
|------------------------------------------------------------------------------------------------------|---------|
| <b>Figures S1-S4:</b> <sup>1</sup> H and <sup>13</sup> C NMR spectra for compound <b>9a</b> .....    | S2-S5   |
| <b>Figures S5-S8:</b> <sup>1</sup> H and <sup>13</sup> C NMR spectra for compound <b>9b</b> .....    | S6-S9   |
| <b>Figures S9-S12:</b> <sup>1</sup> H and <sup>13</sup> C NMR spectra for compound <b>9c</b> .....   | S10-S13 |
| <b>Figures S13-S16:</b> <sup>1</sup> H and <sup>13</sup> C NMR spectra for compound <b>9d</b> .....  | S14-S17 |
| <b>Figures S17-S20:</b> <sup>1</sup> H and <sup>13</sup> C NMR spectra for compound <b>9e</b> .....  | S18-S21 |
| <b>Figures S21-S24:</b> <sup>1</sup> H and <sup>13</sup> C NMR spectra for compound <b>9f</b> .....  | S22-S25 |
| <b>Figures S25-S28:</b> <sup>1</sup> H and <sup>13</sup> C NMR spectra for compound <b>9g</b> .....  | S26-S29 |
| <b>Figures S29-S32:</b> <sup>1</sup> H and <sup>13</sup> C NMR spectra for compound <b>9h</b> .....  | S30-S33 |
| <b>Figures S33-S36:</b> <sup>1</sup> H and <sup>13</sup> C NMR spectra for compound <b>9i</b> .....  | S34-S37 |
| <b>Figures S37-S40:</b> <sup>1</sup> H and <sup>13</sup> C NMR spectra for compound <b>9j</b> .....  | S38-S41 |
| <b>Figures S41-S44:</b> <sup>1</sup> H and <sup>13</sup> C NMR spectra for compound <b>9k</b> .....  | S42-S45 |
| <b>Figures S45-S48:</b> <sup>1</sup> H and <sup>13</sup> C NMR spectra for compound <b>9l</b> .....  | S46-S49 |
| <b>Figures S49-S52:</b> <sup>1</sup> H and <sup>13</sup> C NMR spectra for compound <b>9m</b> .....  | S50-S53 |
| <b>Figures S53-S56:</b> <sup>1</sup> H and <sup>13</sup> C NMR spectra for compound <b>9n</b> .....  | S54-S57 |
| <b>Figures S57-S60:</b> <sup>1</sup> H and <sup>13</sup> C NMR spectra for compound <b>17a</b> ..... | S58-S61 |
| <b>Figures S61-S64:</b> <sup>1</sup> H and <sup>13</sup> C NMR spectra for compound <b>17b</b> ..... | S62-S65 |
| <b>Figures S65-S68:</b> <sup>1</sup> H and <sup>13</sup> C NMR spectra for compound <b>17c</b> ..... | S66-S69 |
| <b>Figures S69-S72:</b> <sup>1</sup> H and <sup>13</sup> C NMR spectra for compound <b>24a</b> ..... | S70-S73 |
| <b>Figures S73-S76:</b> <sup>1</sup> H and <sup>13</sup> C NMR spectra for compound <b>24b</b> ..... | S74-S77 |
| <b>Figures S77-S80:</b> <sup>1</sup> H and <sup>13</sup> C NMR spectra for compound <b>24c</b> ..... | S78-S81 |
| <b>Figures S81-S84:</b> <sup>1</sup> H and <sup>13</sup> C NMR spectra for compound <b>28</b> .....  | S82-S85 |

\*Email: werbovetz.1@osu.edu

9a 2 1 C:\Bruker\TopSpin4.0.8\examdata

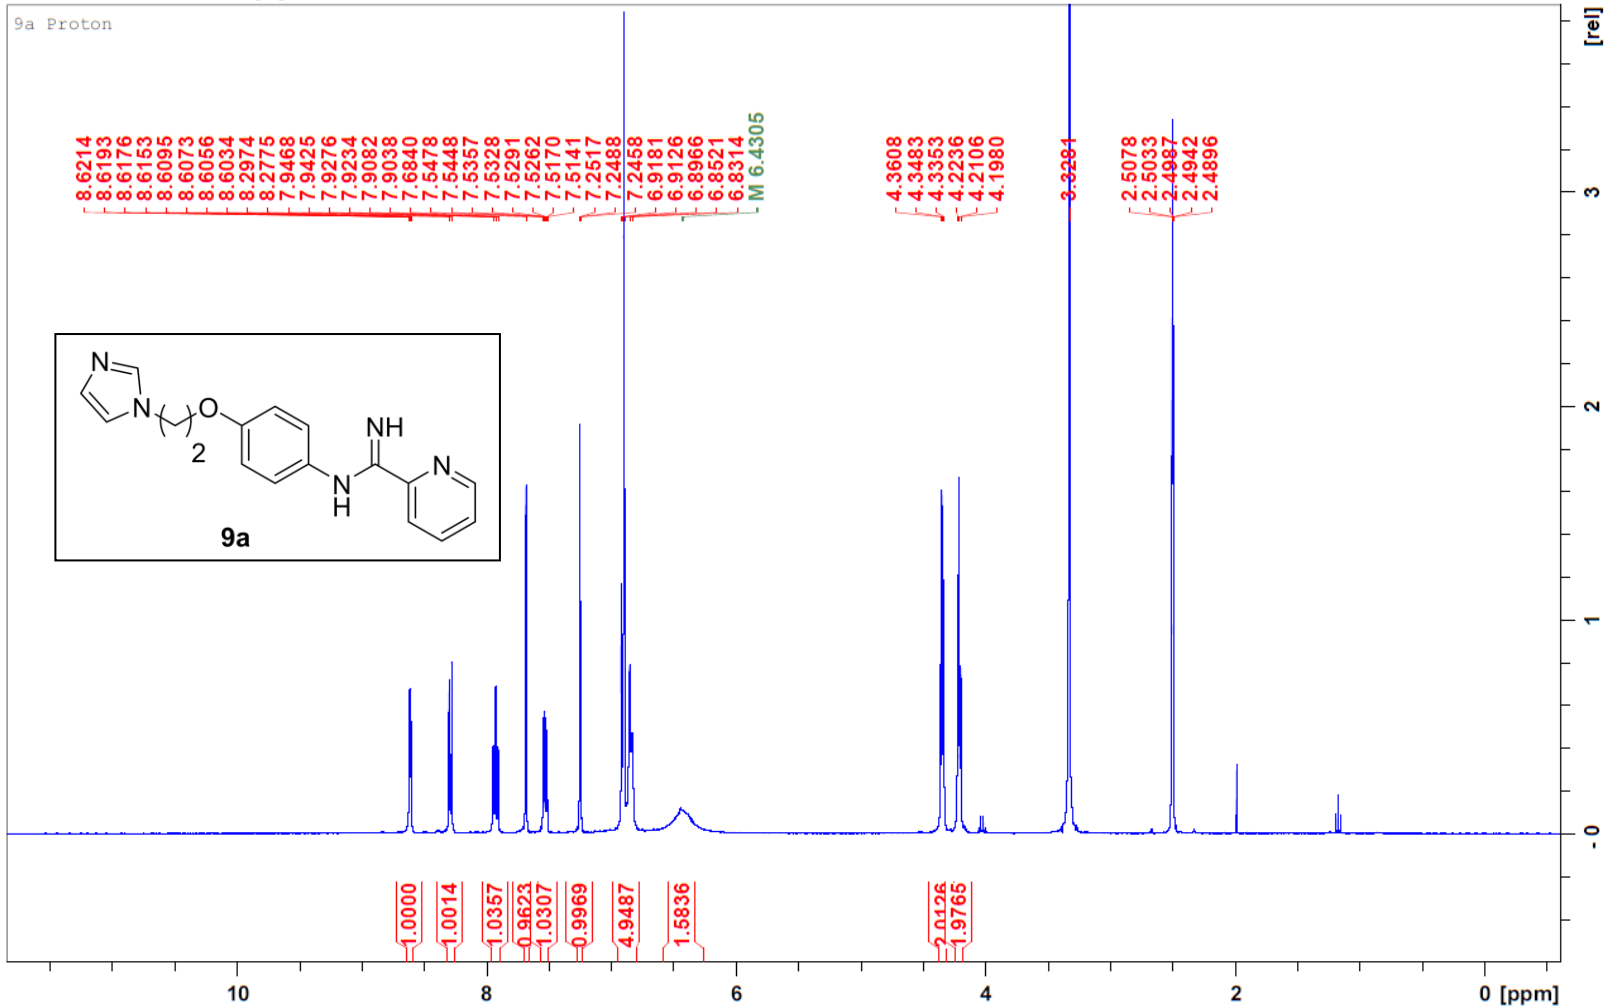

Figure S1.  $^1\text{H}$  NMR spectrum of compound **9a** (400 MHz,  $\text{DMSO-}d_6$ ).

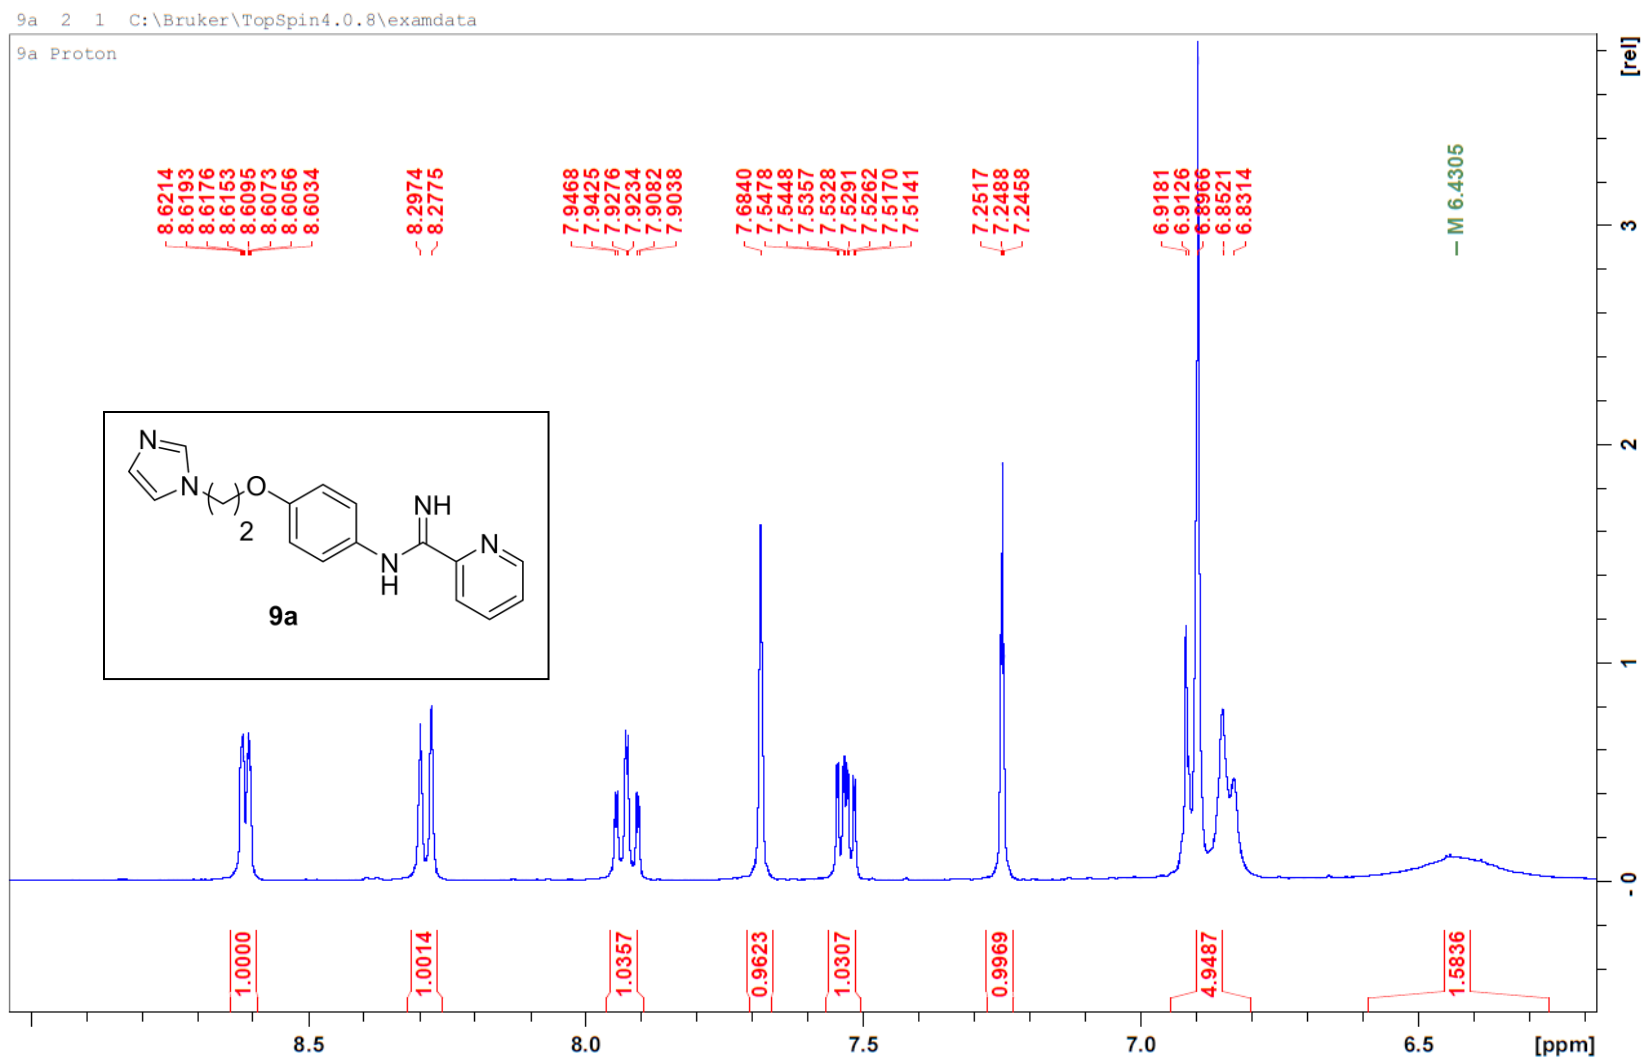

Figure S2. Expanded  $^1\text{H}$  NMR spectrum of compound **9a** (400 MHz,  $\text{DMSO-}d_6$ ).

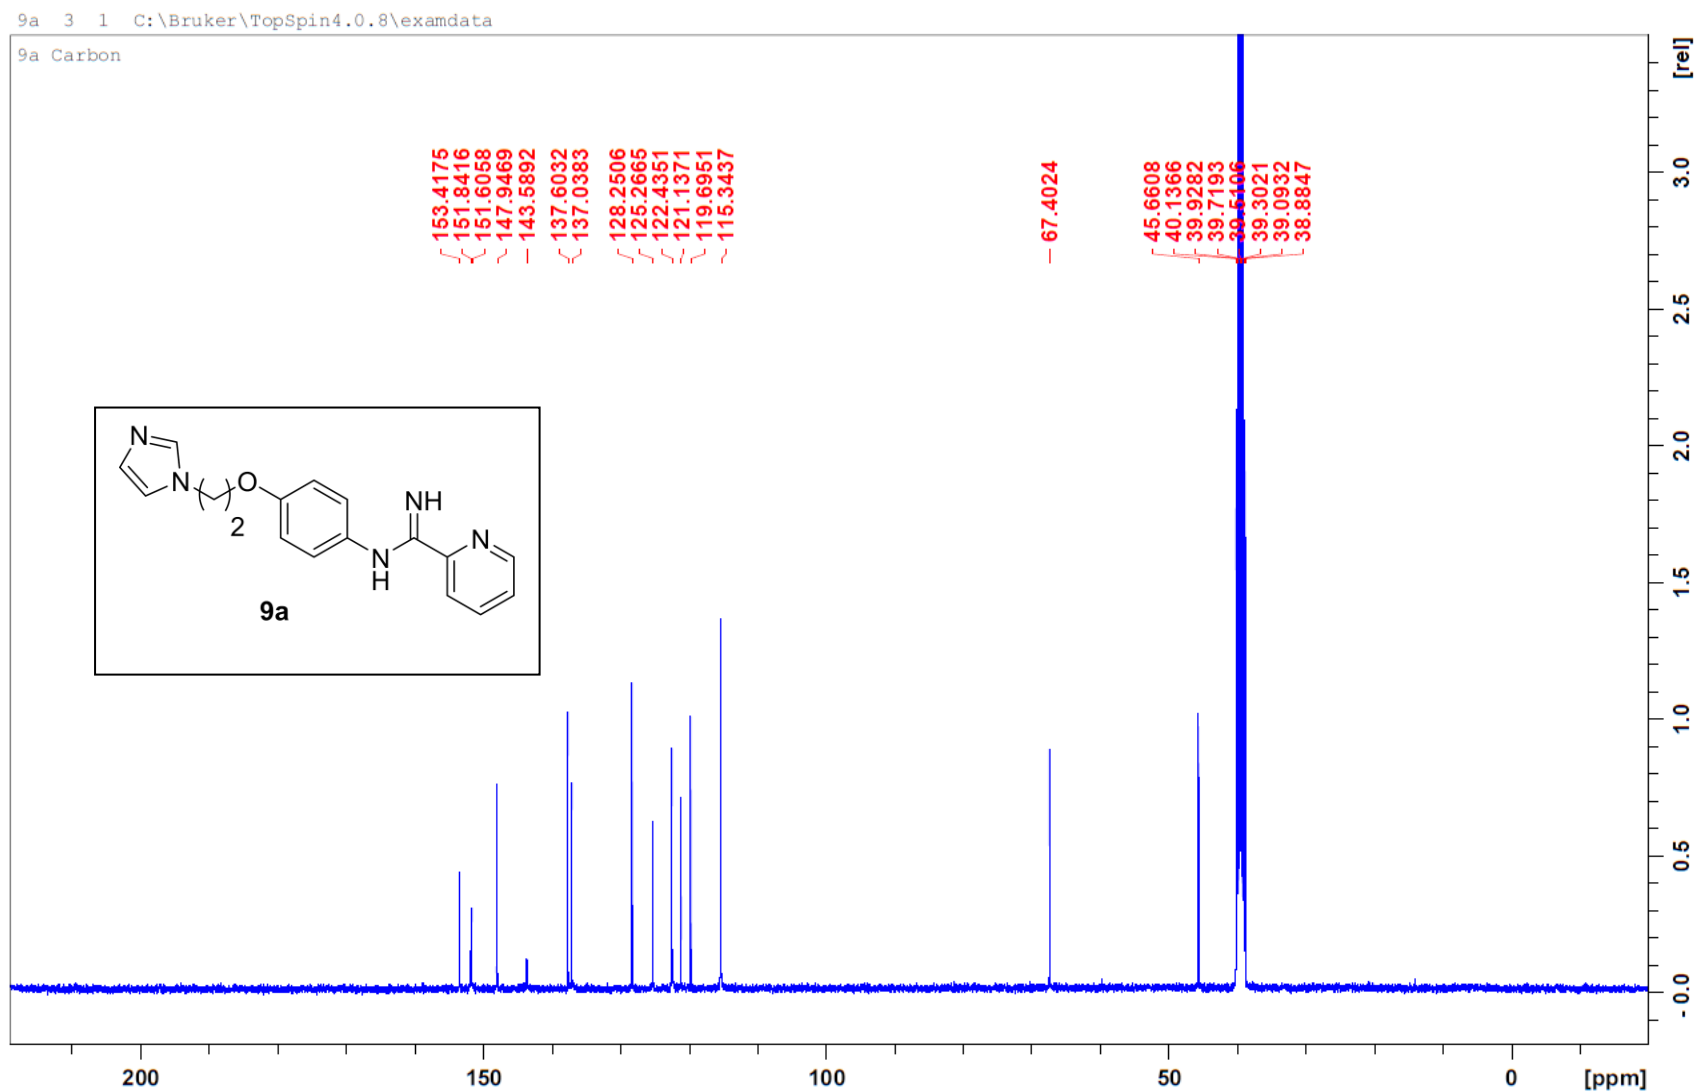

**Figure S3.**  $^{13}\text{C}$  NMR spectrum of compound **9a** (100 MHz,  $\text{DMSO-}d_6$ ).

9a 3 1 C:\Bruker\TopSpin4.0.8\examdata

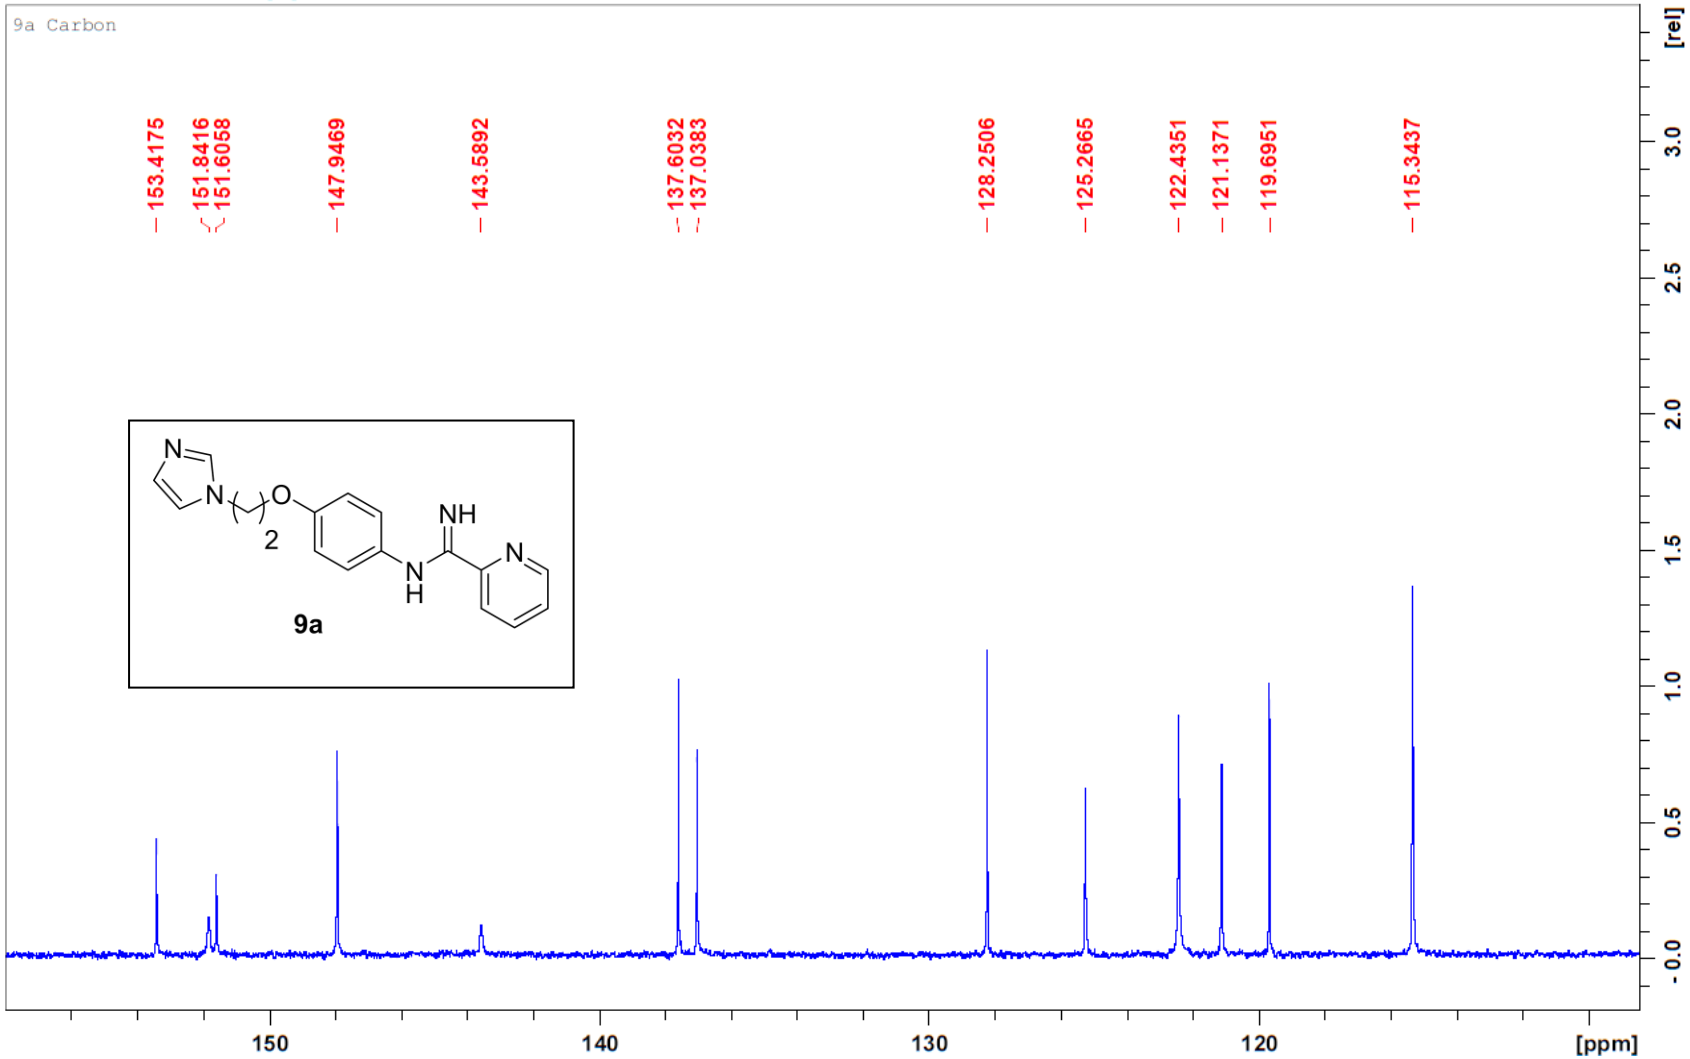

**Figure S4.** Expanded  $^{13}\text{C}$  NMR spectrum of compound **9a** (100 MHz,  $\text{DMSO-}d_6$ ).

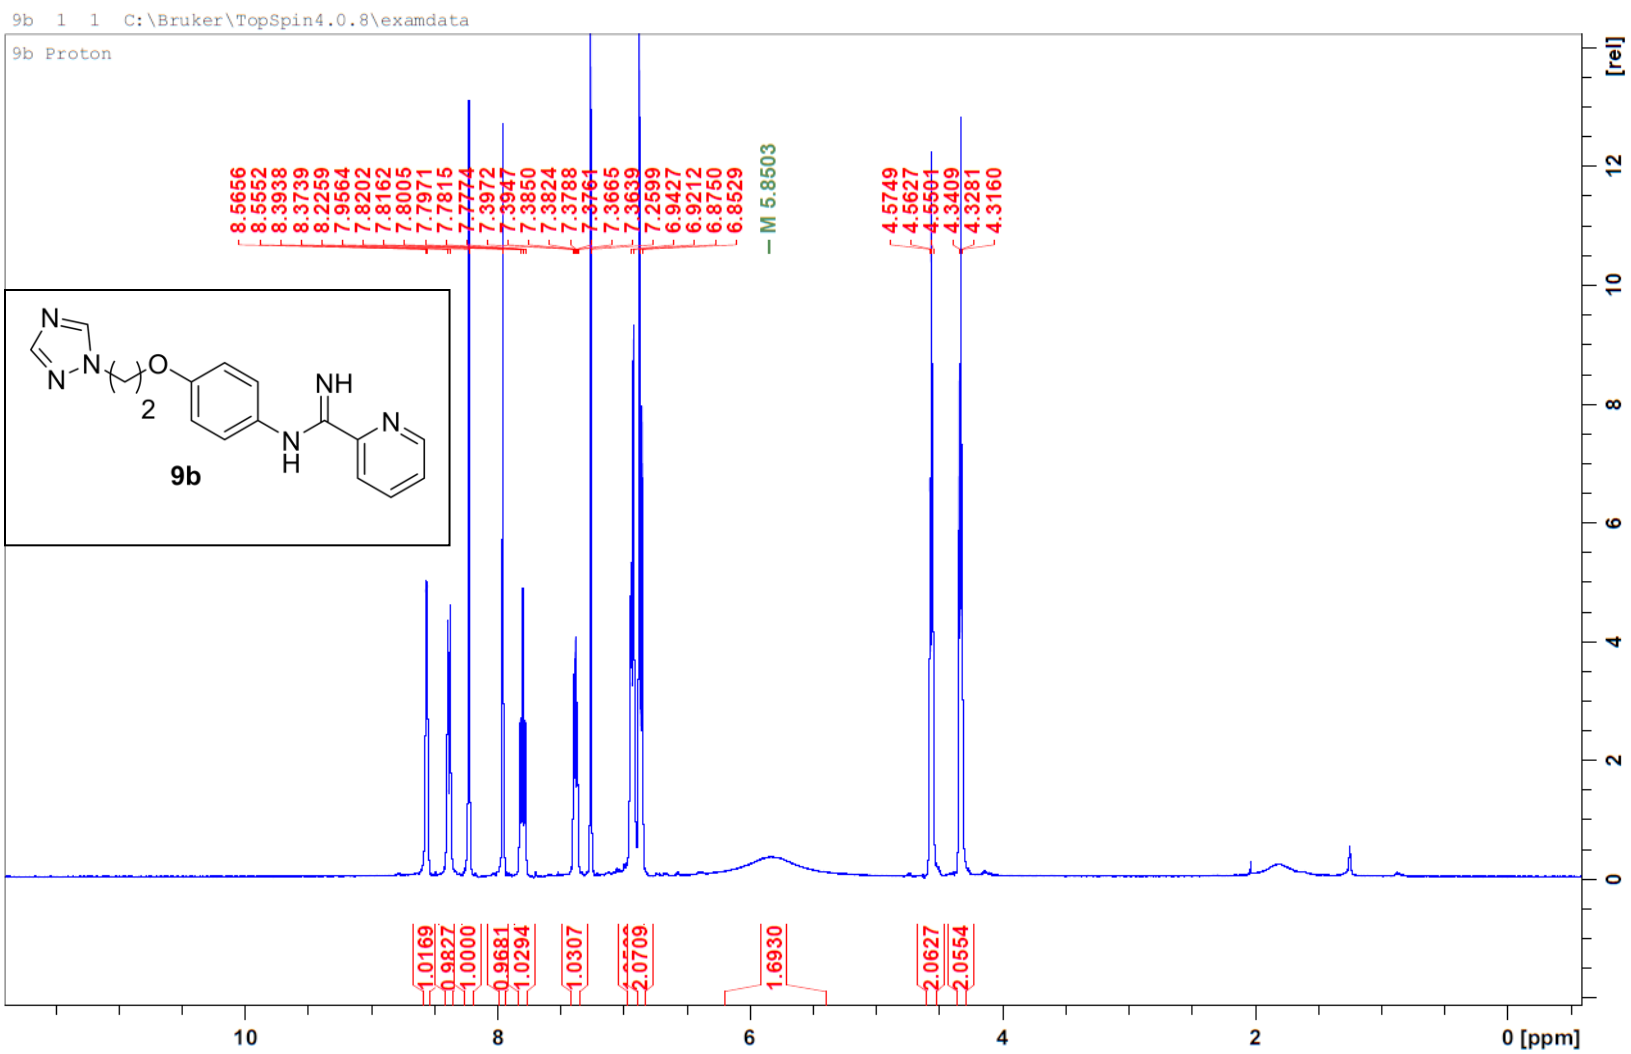

Figure S5. <sup>1</sup>H NMR spectrum of compound **9b** (400 MHz, CDCl<sub>3</sub>).

9b 1 1 C:\Bruker\TopSpin4.0.8\examdata

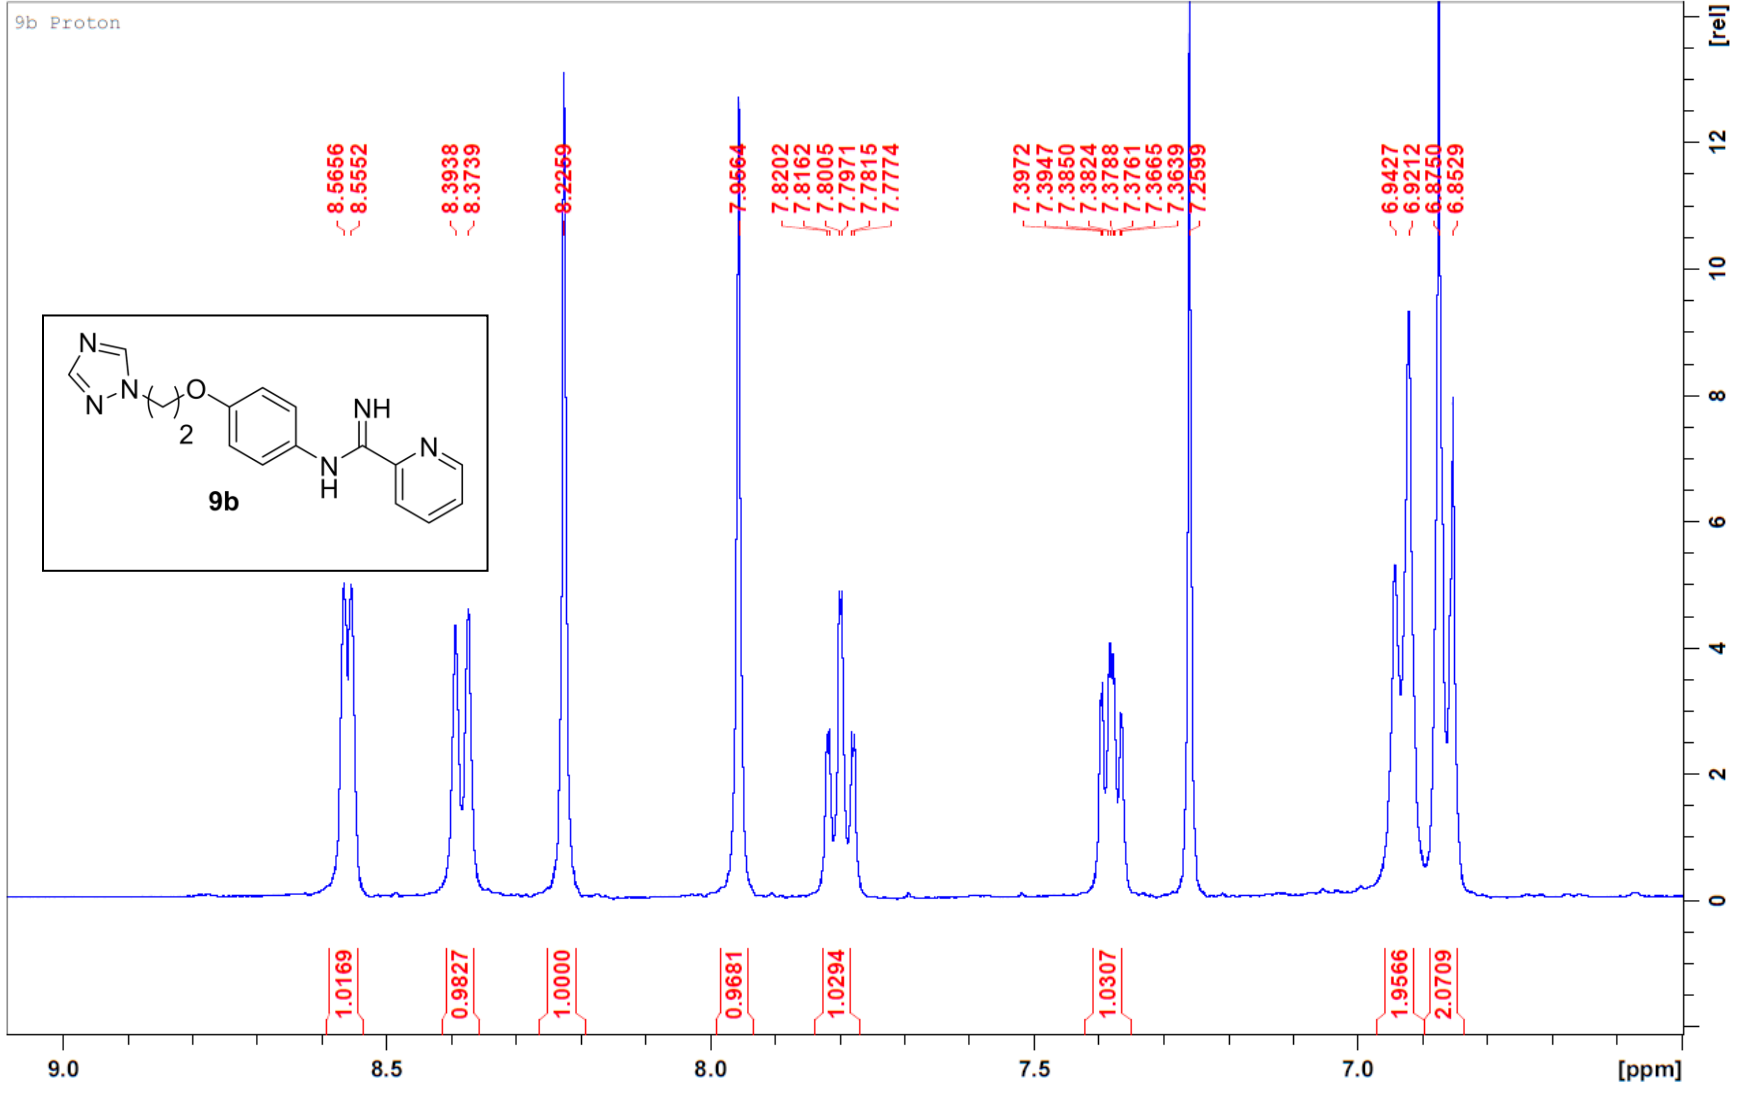

Figure S6. Expanded <sup>1</sup>H NMR spectrum of compound **9b** (400 MHz, CDCl<sub>3</sub>).

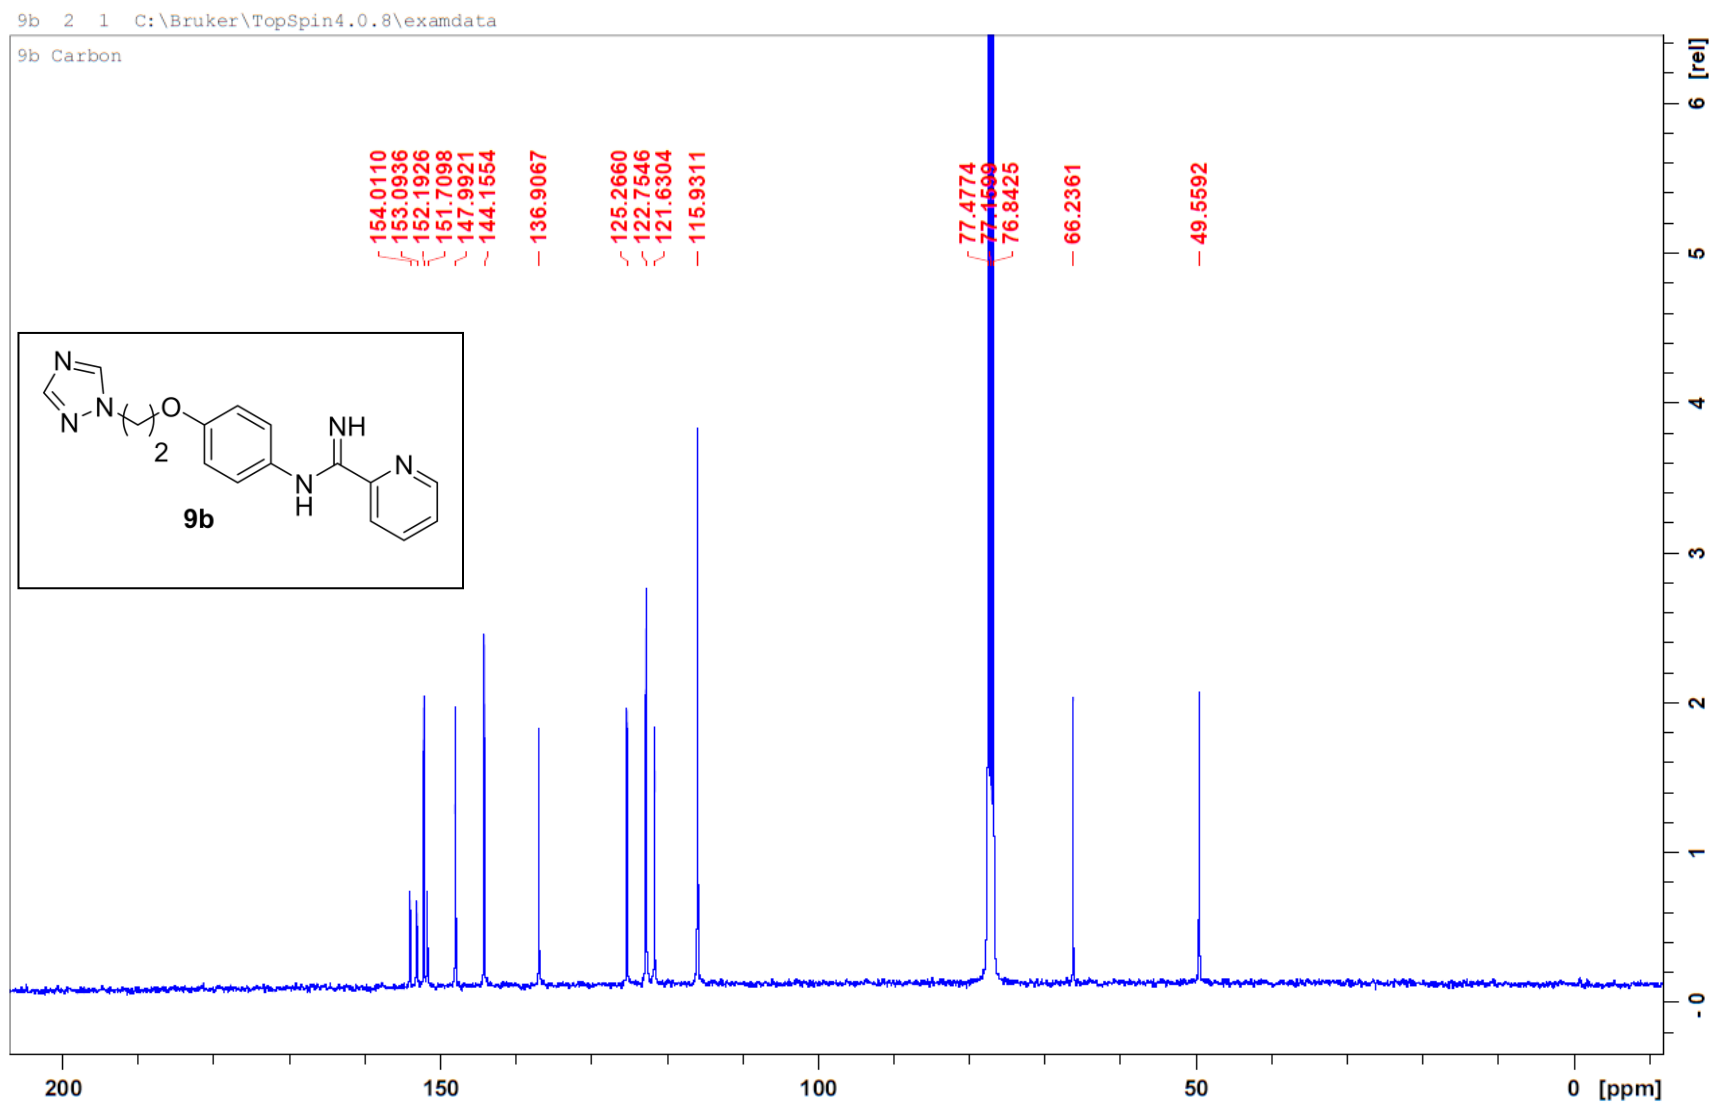

Figure S7.  $^{13}\text{C}$  NMR spectrum of compound **9b** (100 MHz,  $\text{CDCl}_3$ ).



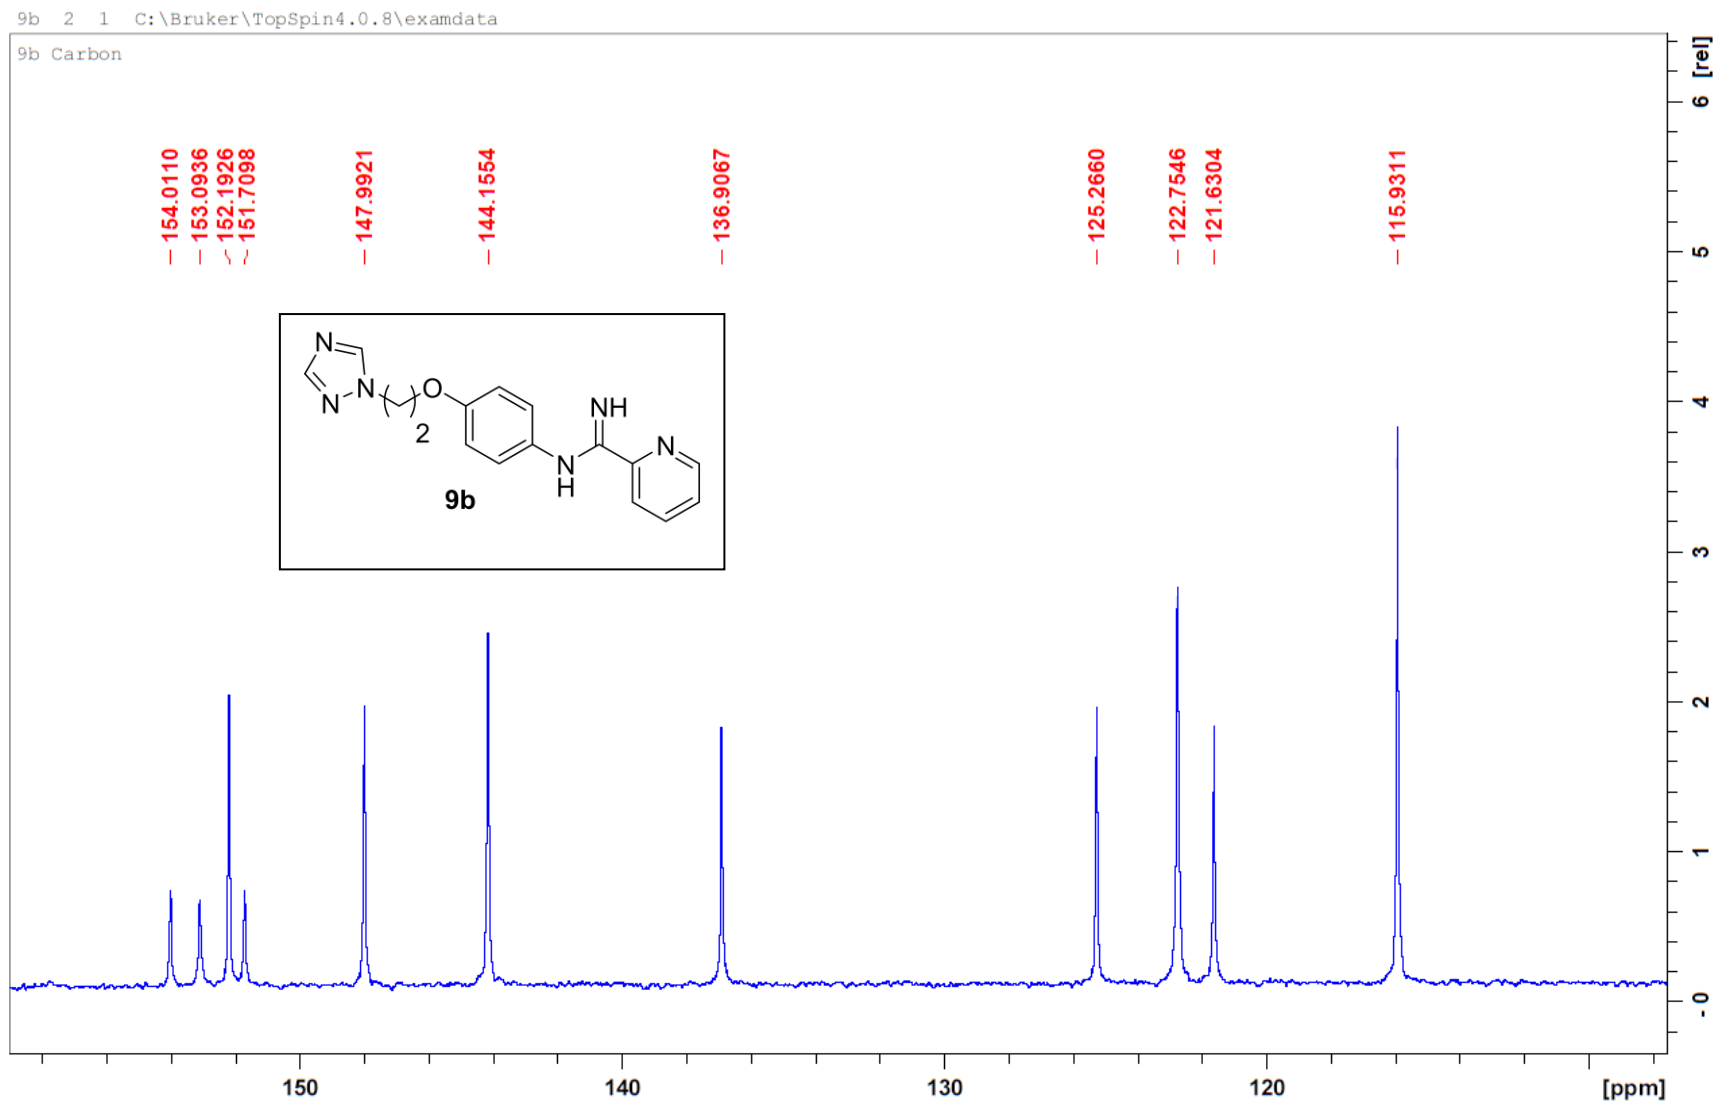

**Figure S8.** Expanded  $^{13}\text{C}$  NMR spectrum of compound **9b** (100 MHz,  $\text{CDCl}_3$ ).

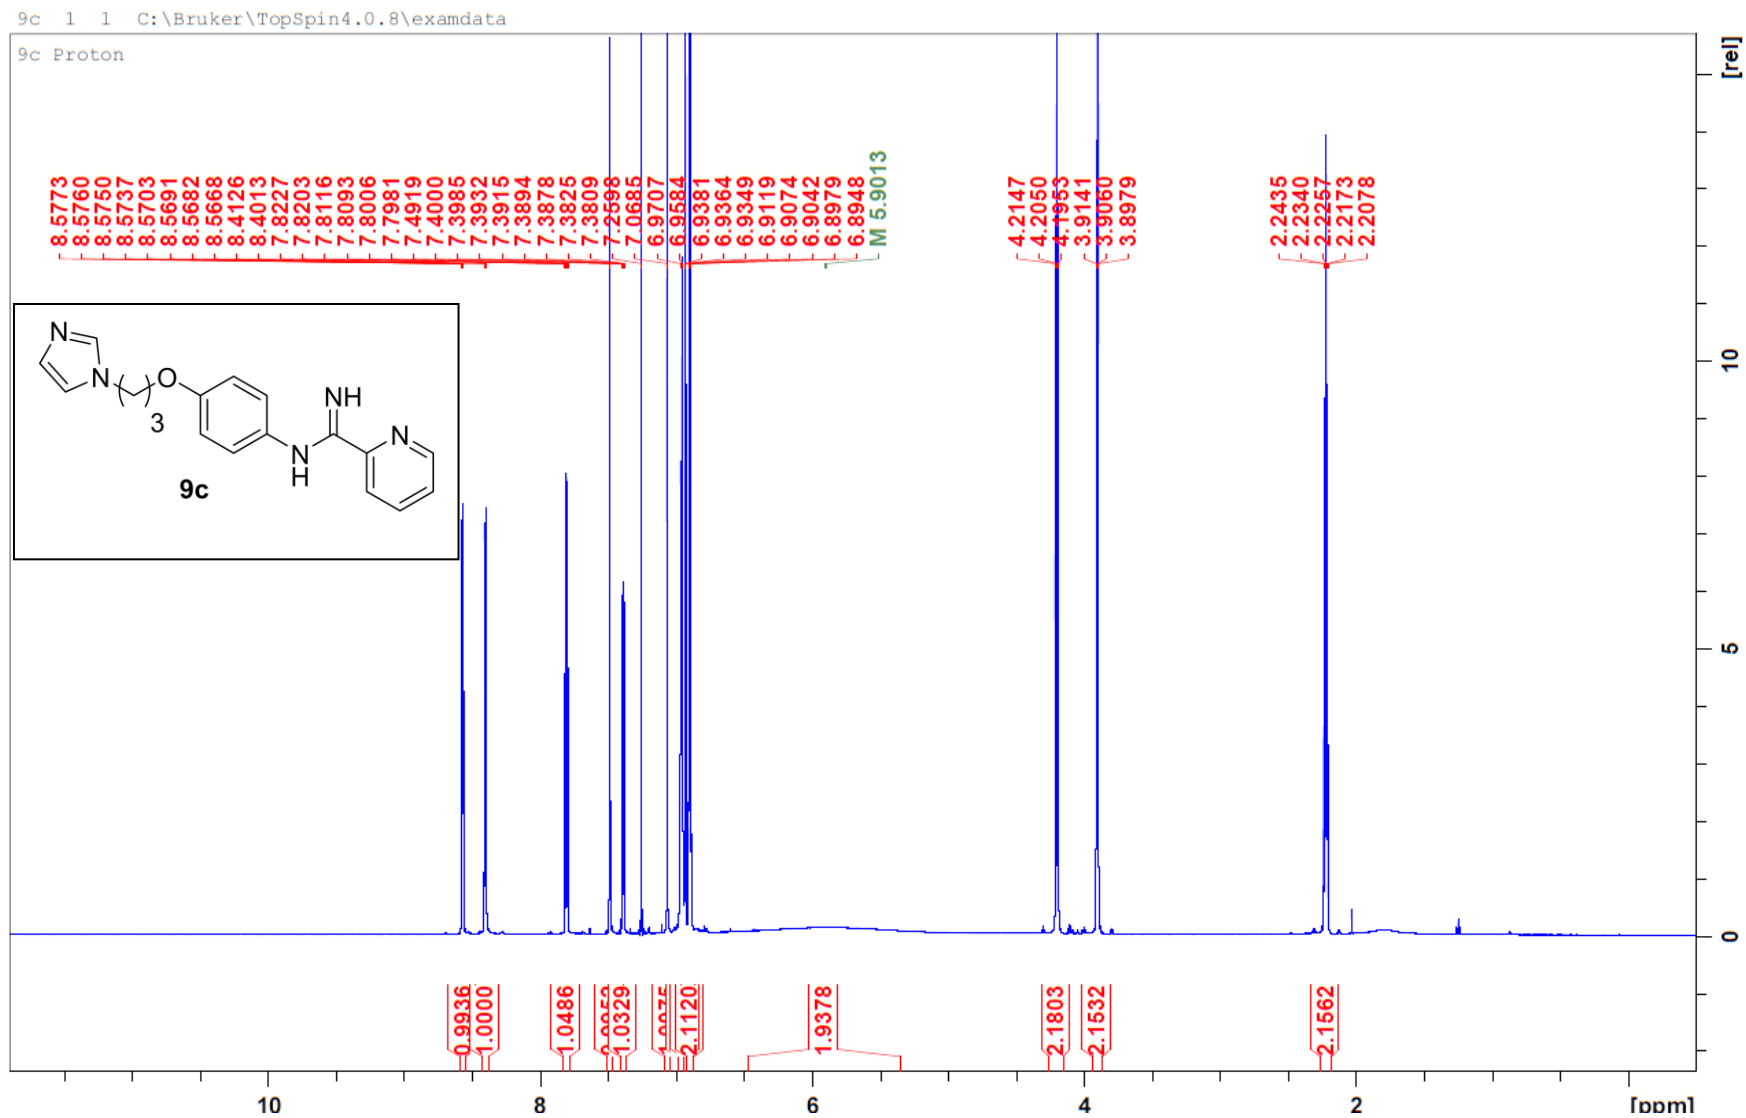

Figure S9.  $^1\text{H}$  NMR spectrum of compound **9c** (700 MHz,  $\text{CDCl}_3$ ).

9c 1 1 C:\Bruker\TopSpin4.0.8\examdata

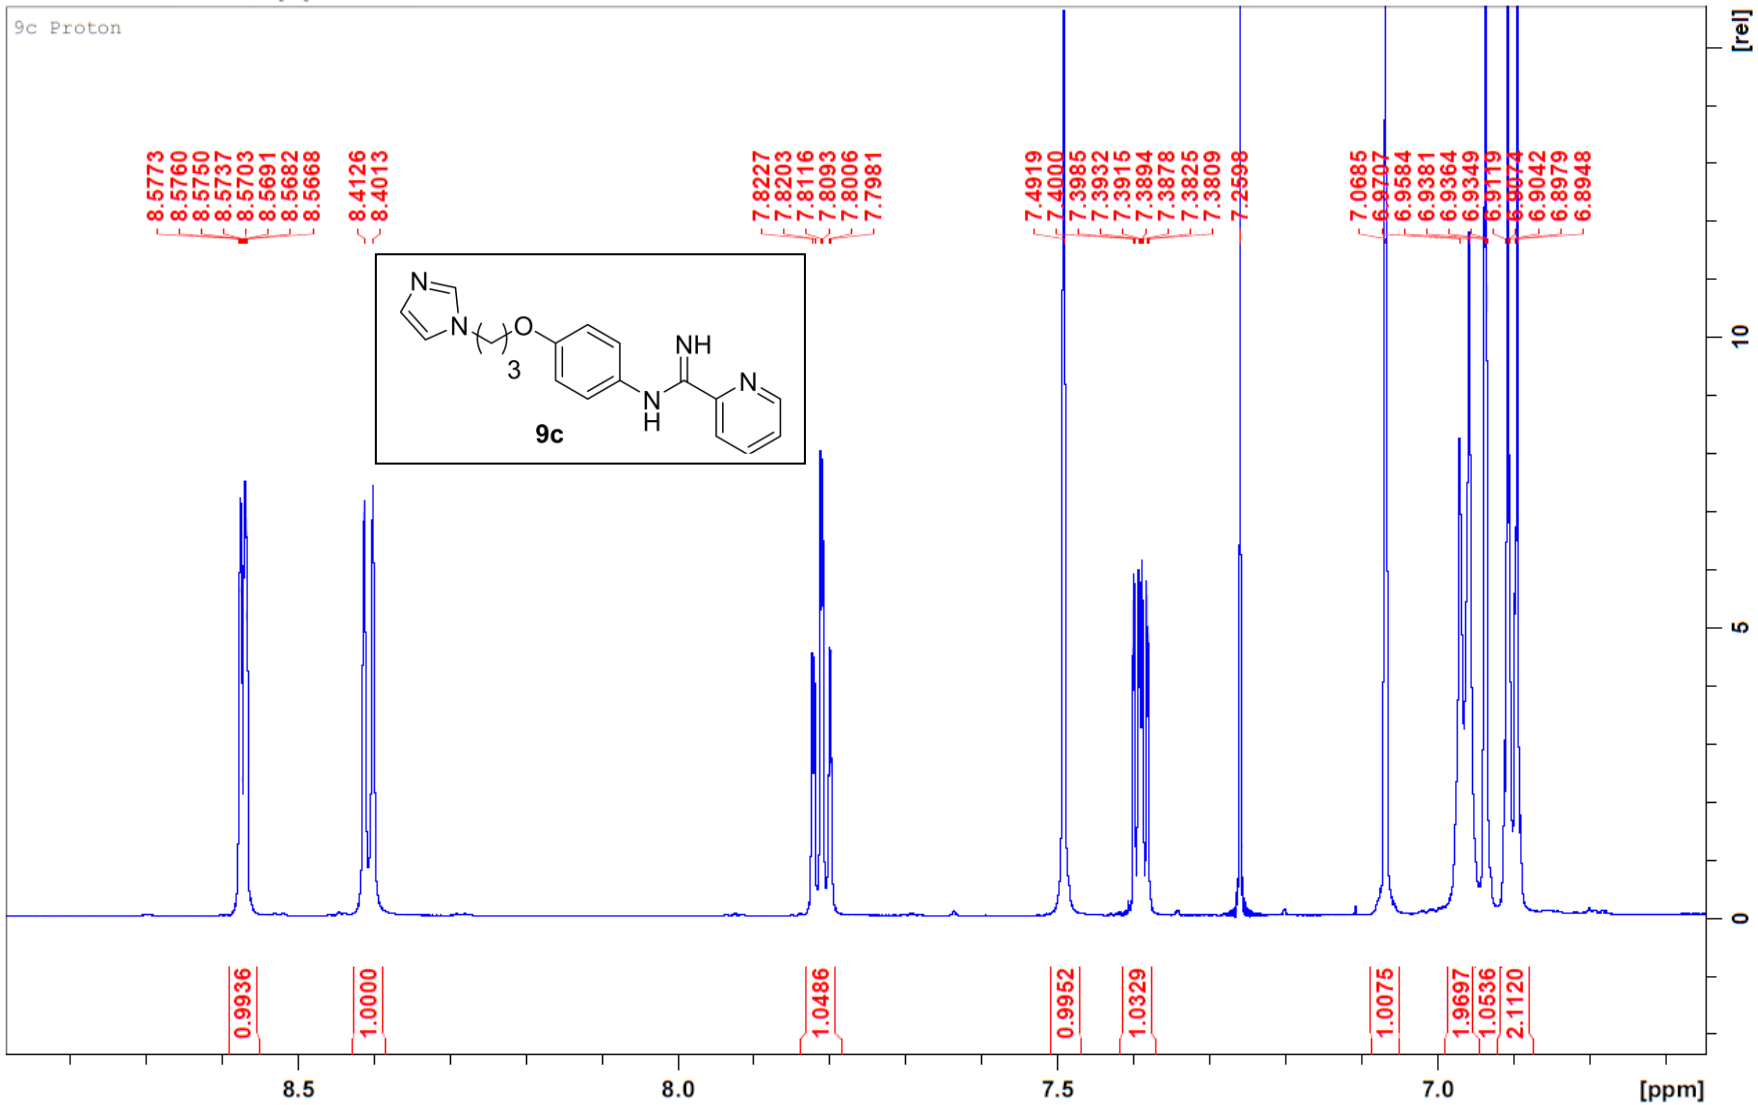

Figure S10. Expanded  $^1\text{H}$  NMR spectrum of compound **9c** (700 MHz,  $\text{CDCl}_3$ ).

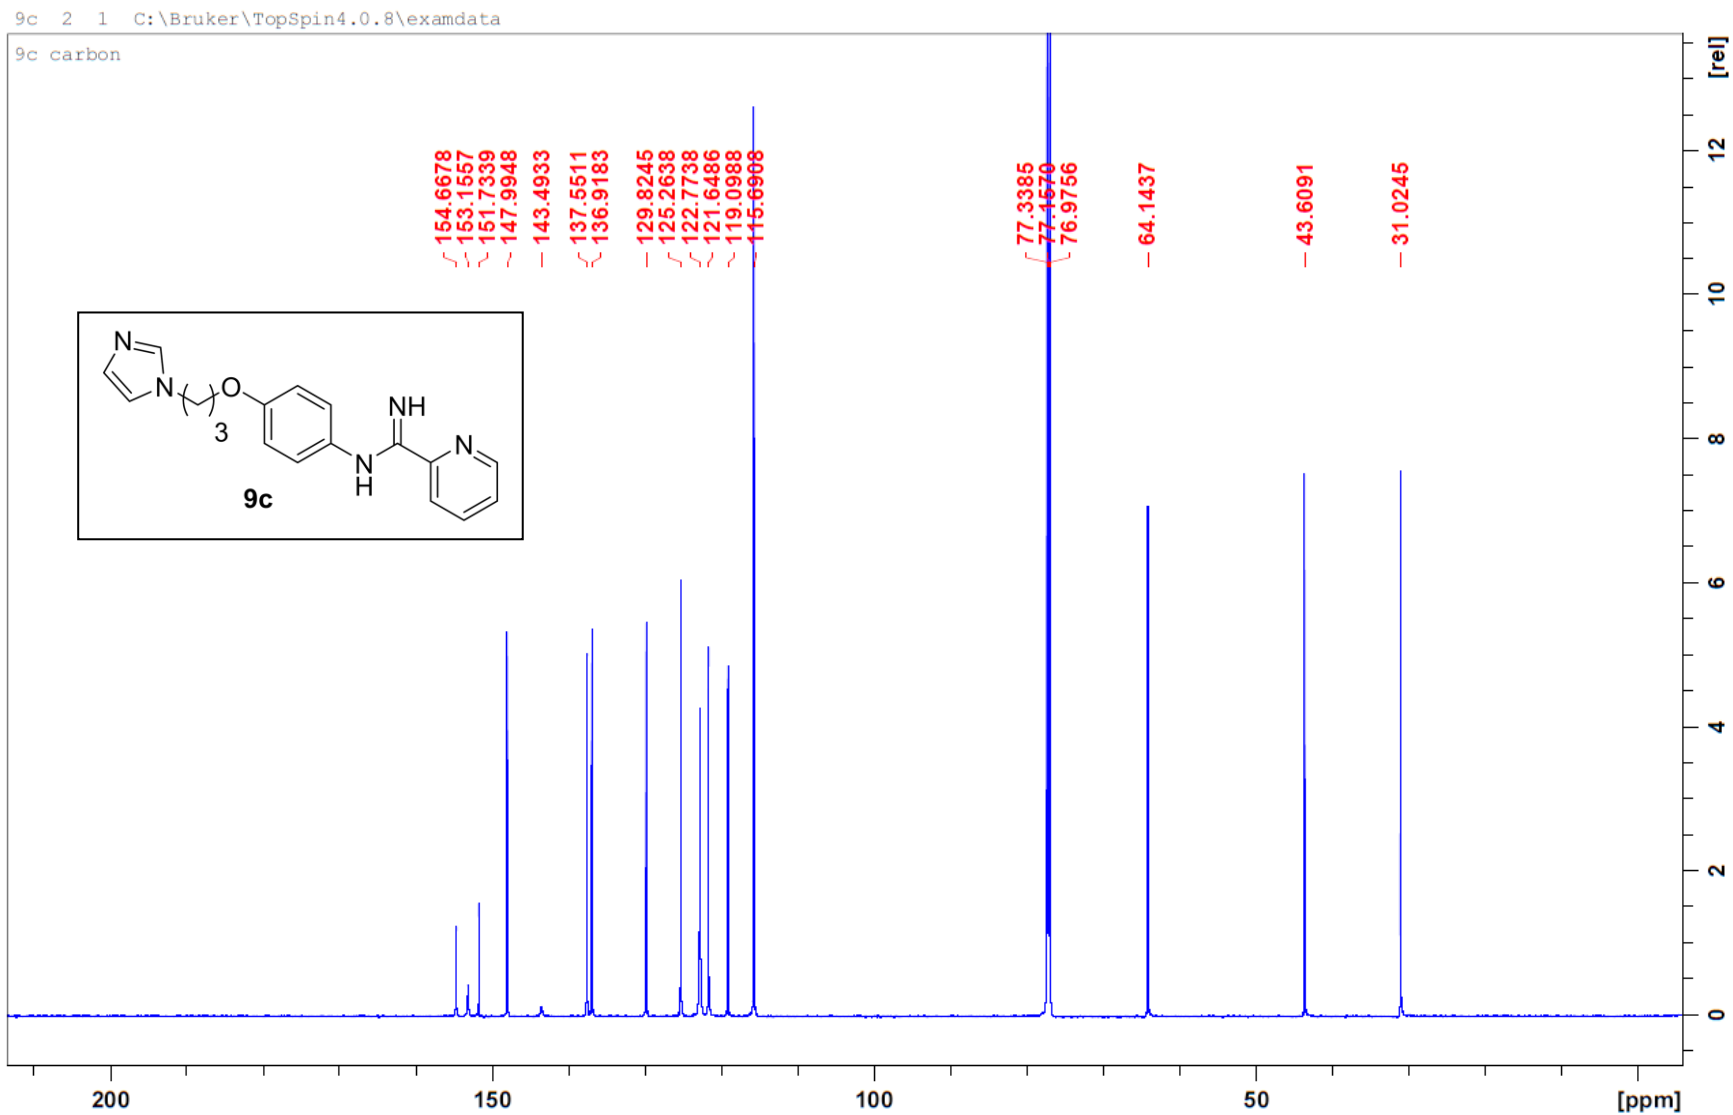

**Figure S11.**  $^{13}\text{C}$  NMR spectrum of compound **9c** (176 MHz,  $\text{CDCl}_3$ ).

9c 2 1 C:\Bruker\TopSpin4.0.8\examdata

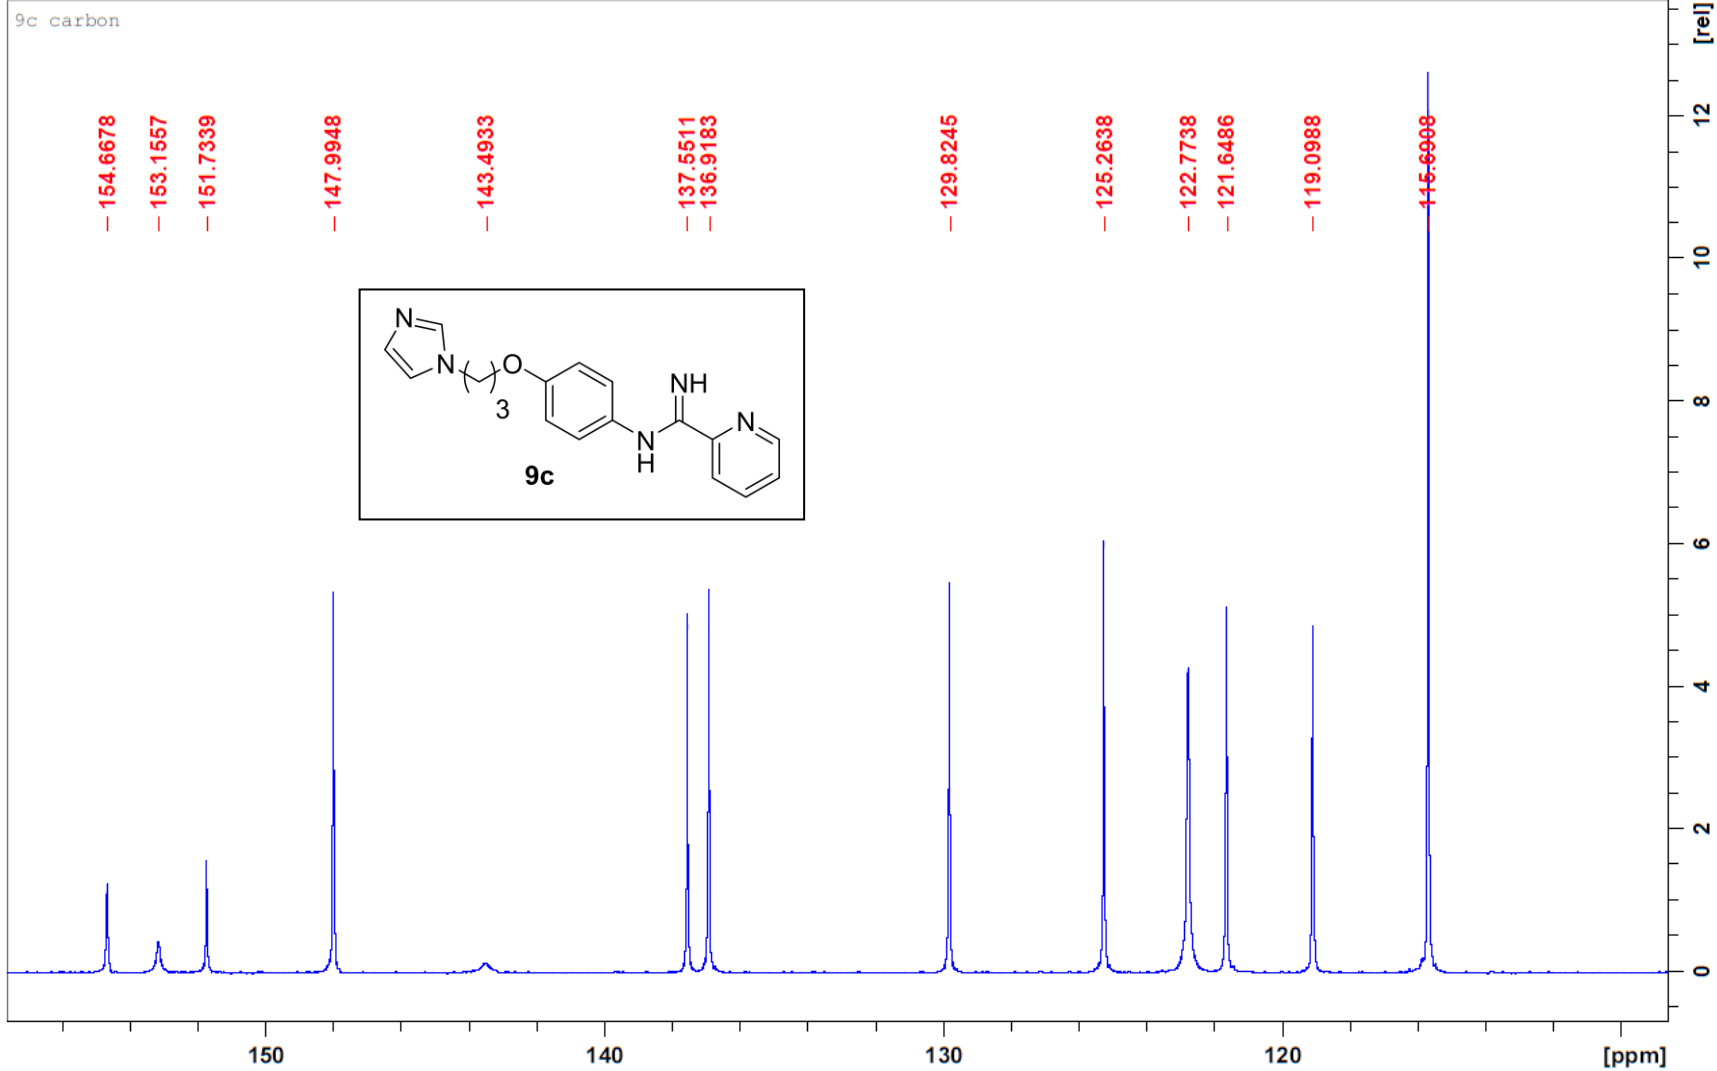

Figure S12. Expanded  $^{13}\text{C}$  NMR spectrum of compound **9c** (176 MHz,  $\text{CDCl}_3$ ).

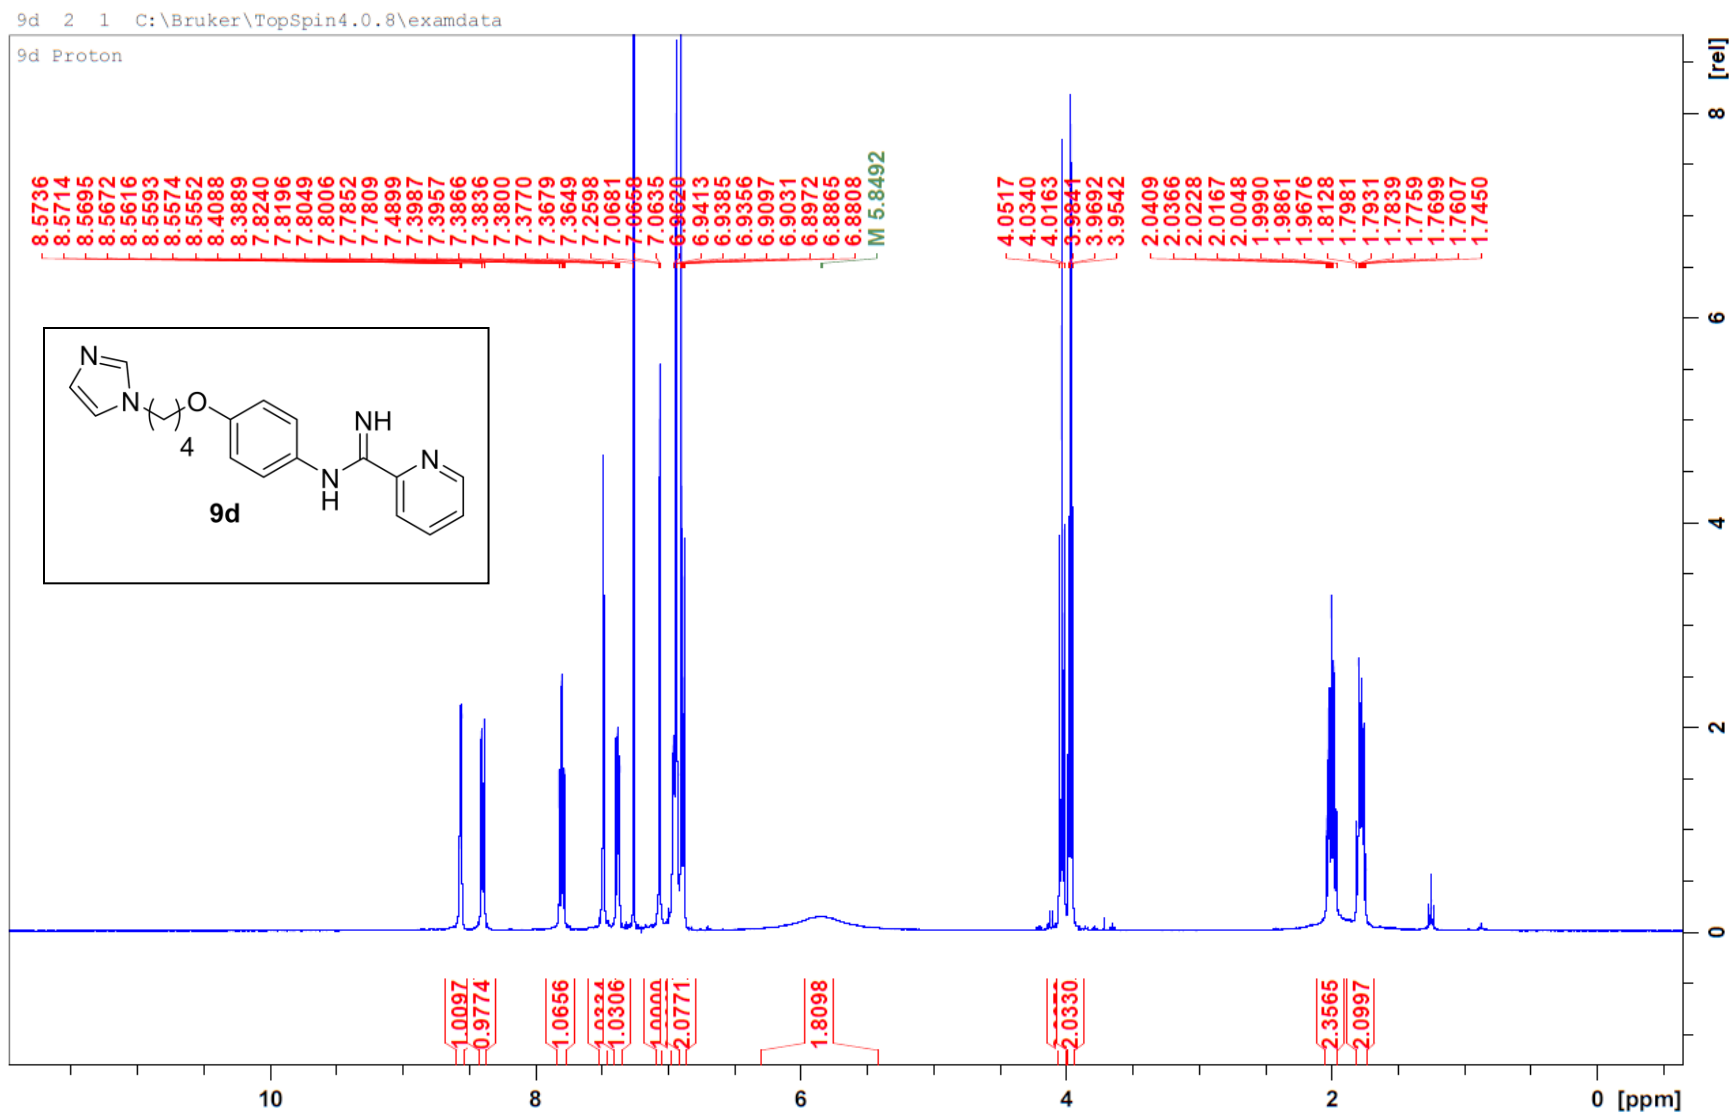

Figure S13. <sup>1</sup>H NMR spectrum of compound **9d** (400 MHz, CDCl<sub>3</sub>).

9d 2 1 C:\Bruker\TopSpin4.0.8\examdata

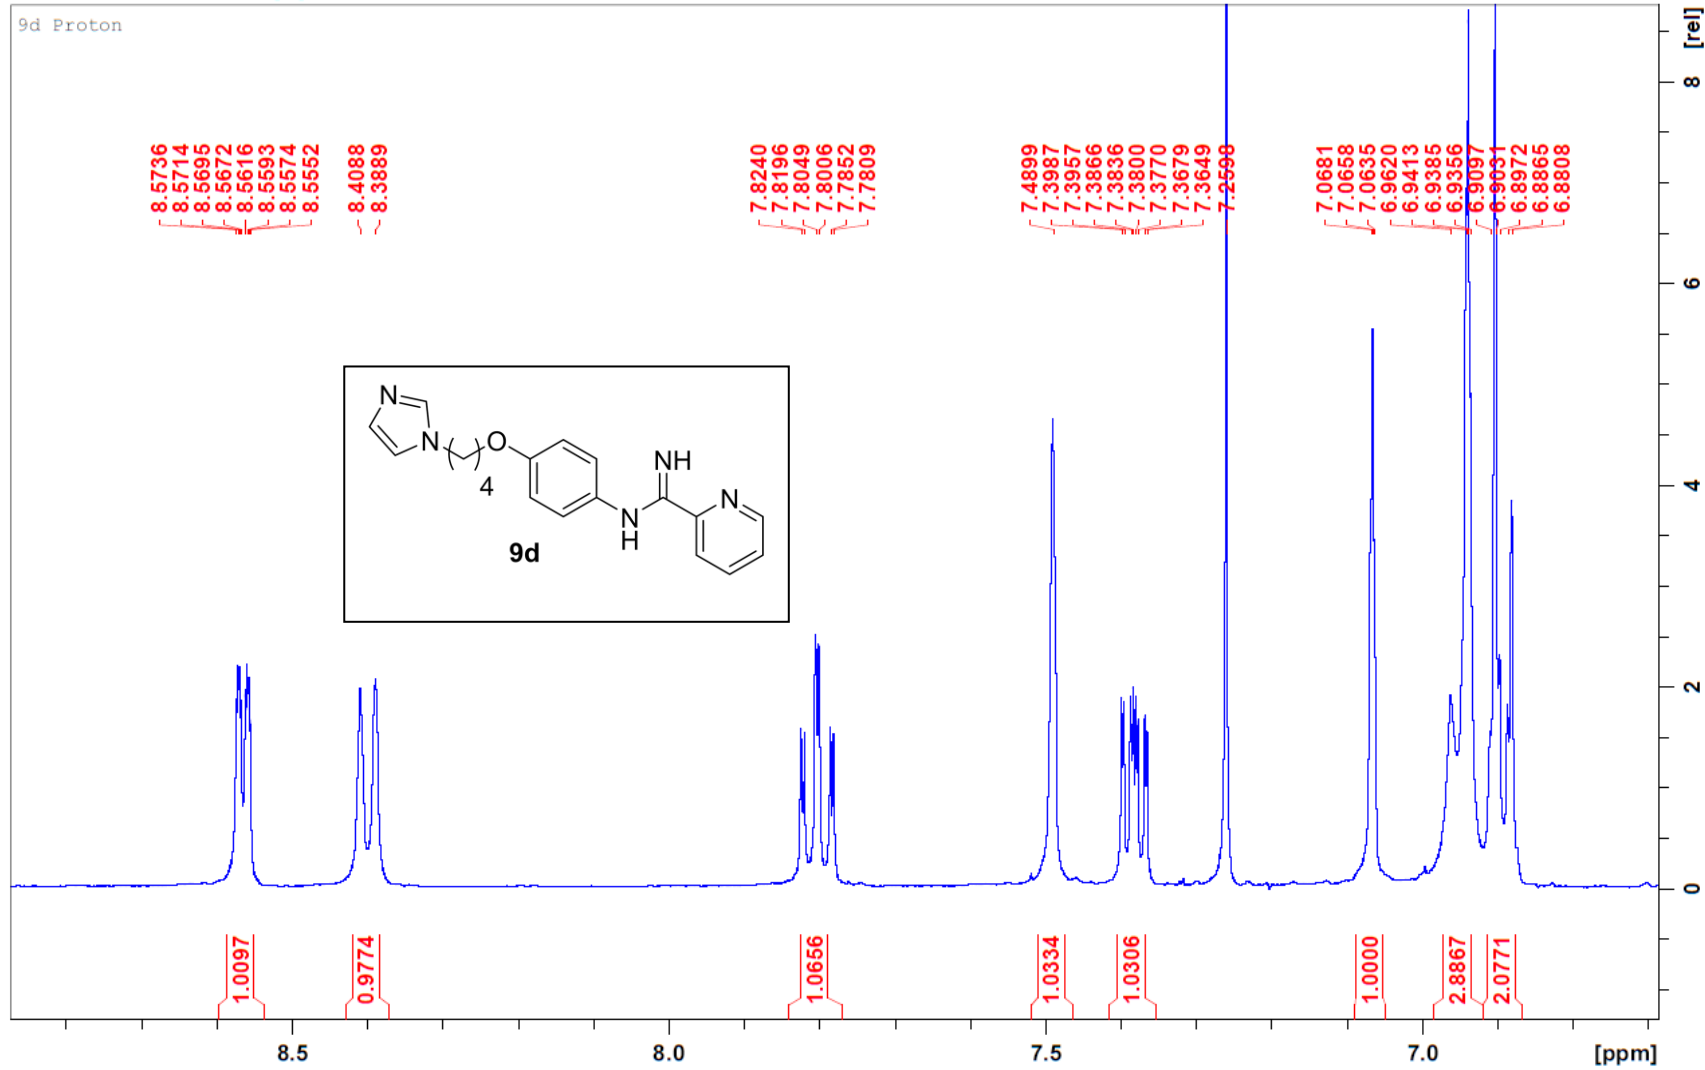

Figure S14. Expanded  $^1\text{H}$  NMR spectrum of compound **9d** (400 MHz,  $\text{CDCl}_3$ ).

9d 3 1 C:\Bruker\TopSpin4.0.8\examdata

9d Carbon

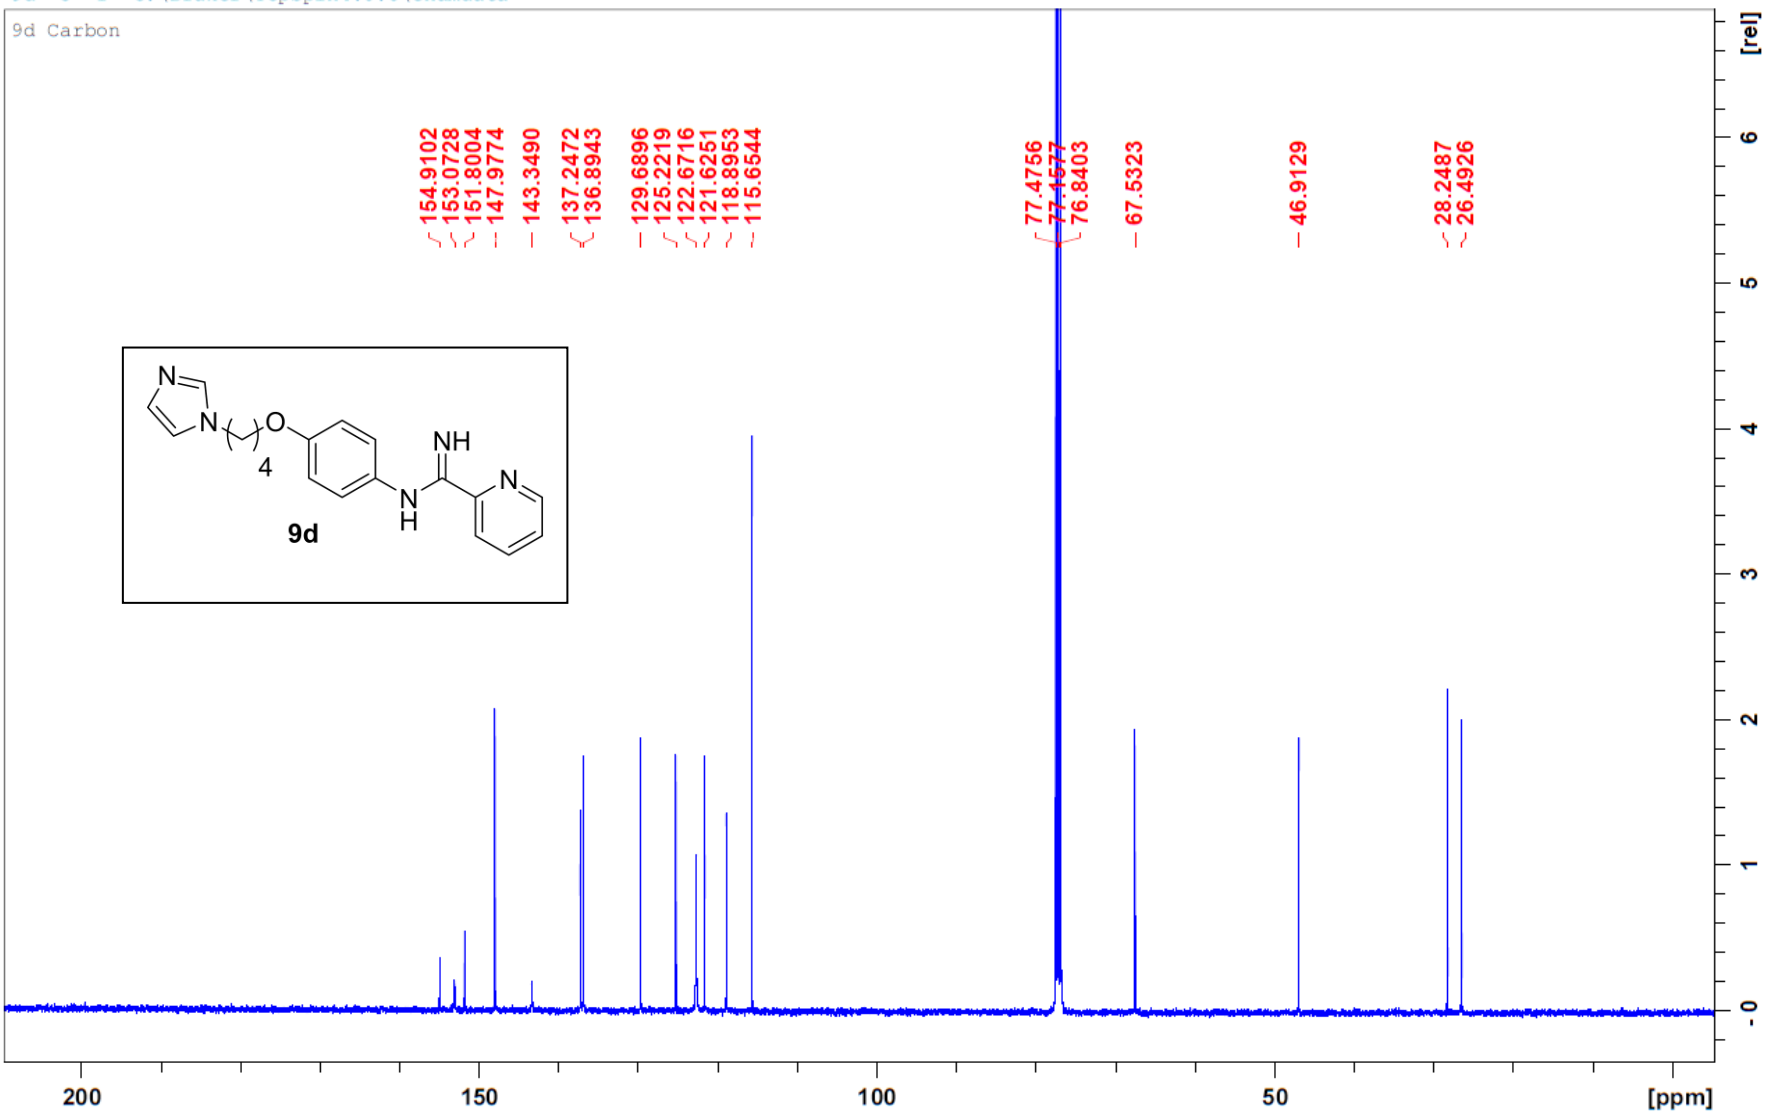

Figure S15.  $^{13}\text{C}$  NMR spectrum of compound **9d** (100 MHz,  $\text{CDCl}_3$ ).





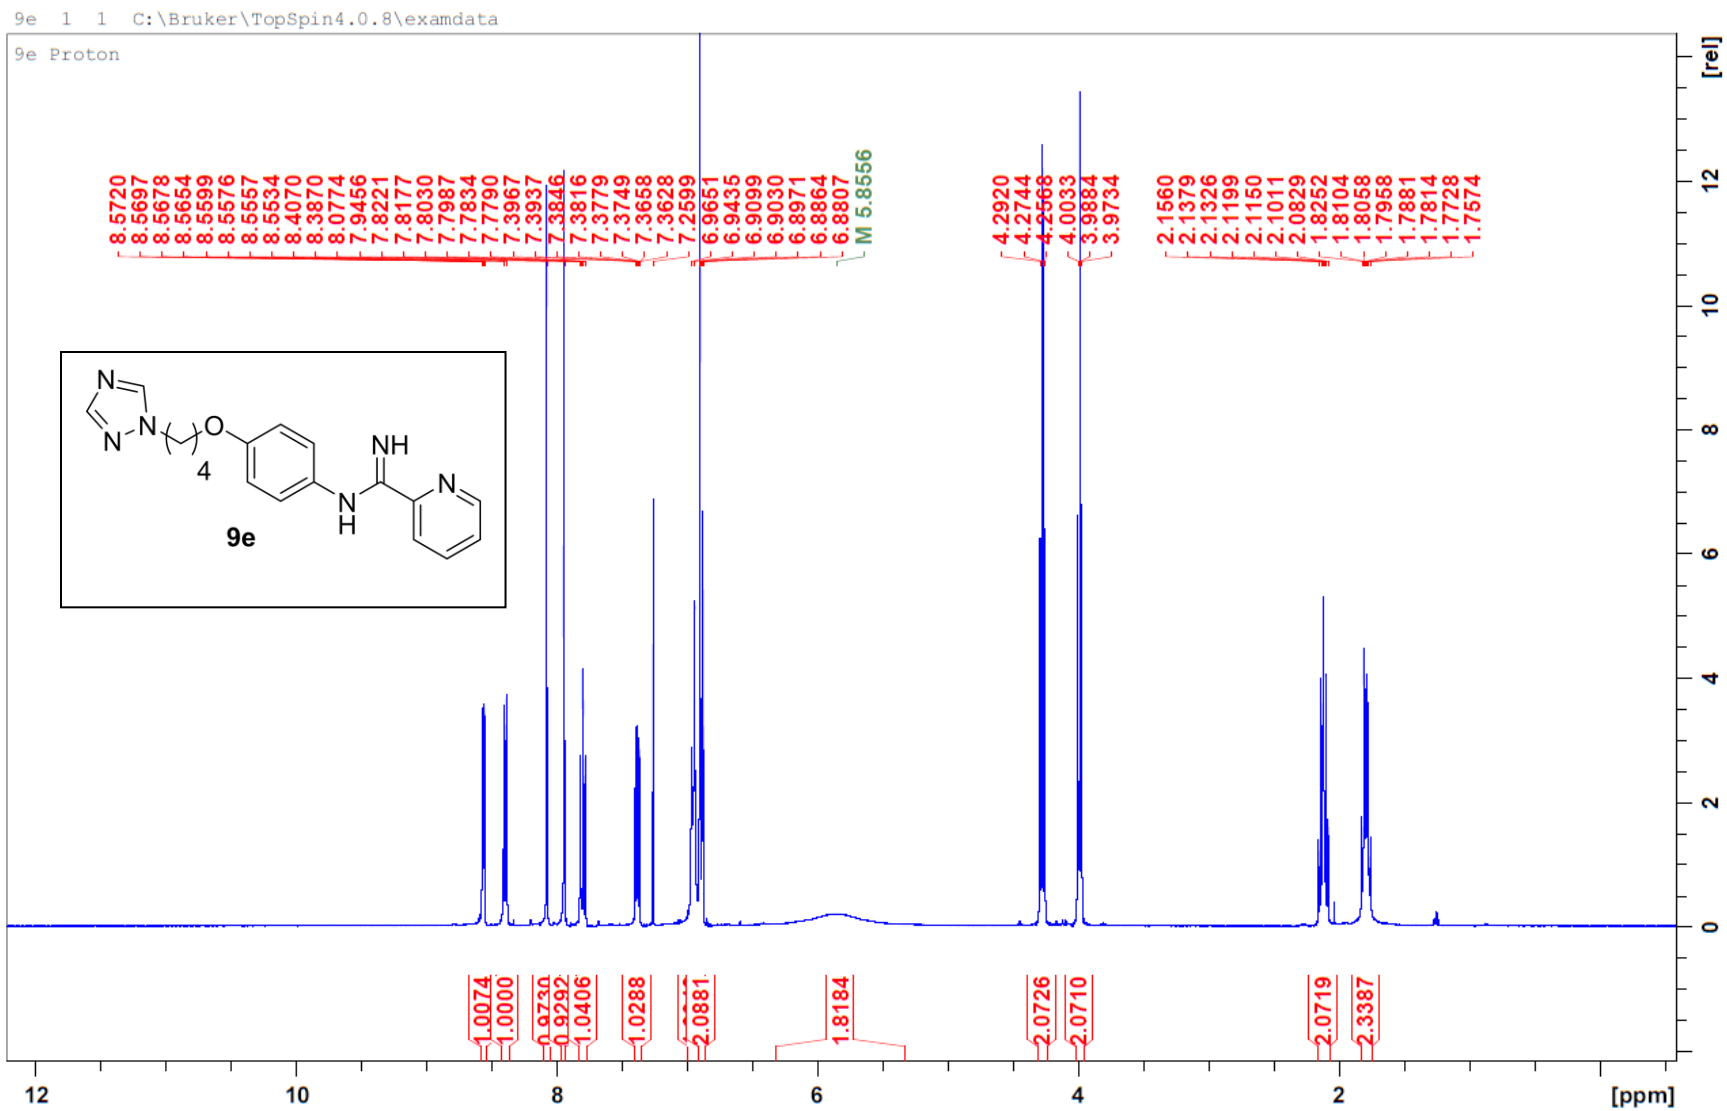

Figure S17. <sup>1</sup>H NMR spectrum of compound **9e** (400 MHz, CDCl<sub>3</sub>).

9e 1 1 C:\Bruker\TopSpin4.0.8\examdata

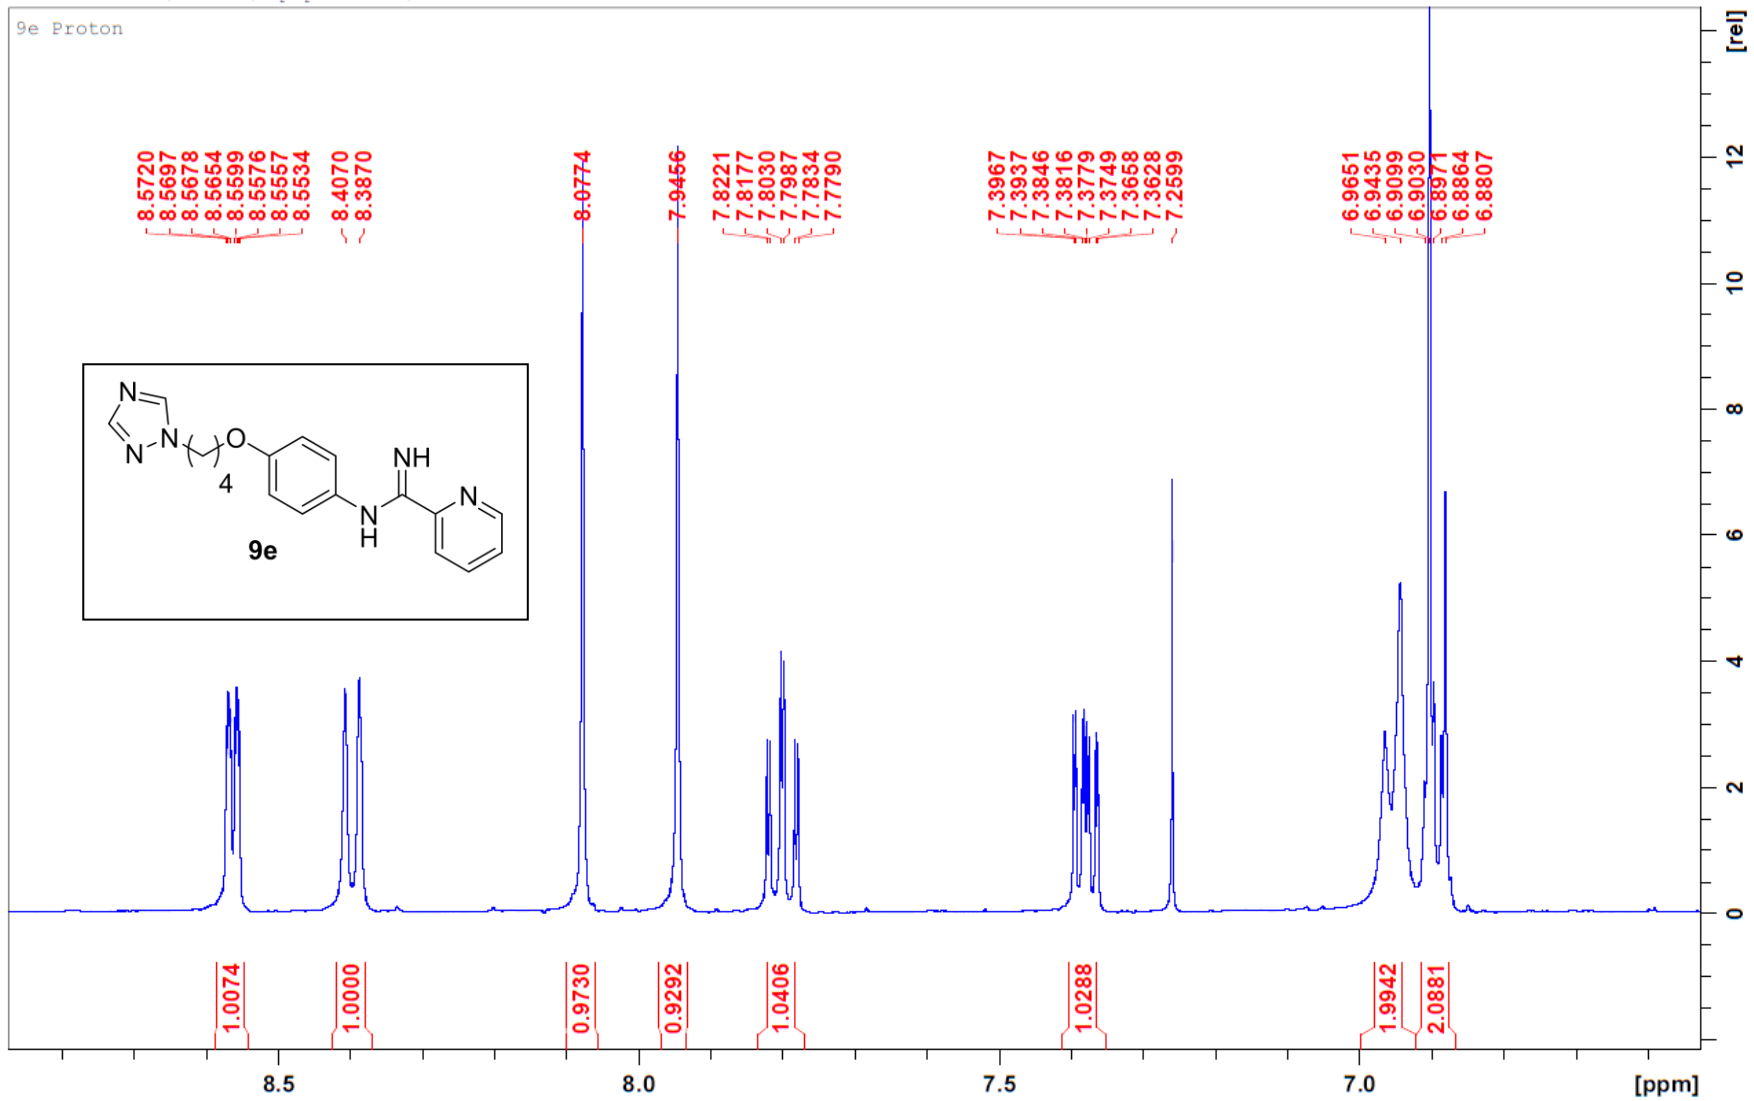

Figure S18. Expanded <sup>1</sup>H NMR spectrum of compound **9e** (400 MHz, CDCl<sub>3</sub>).

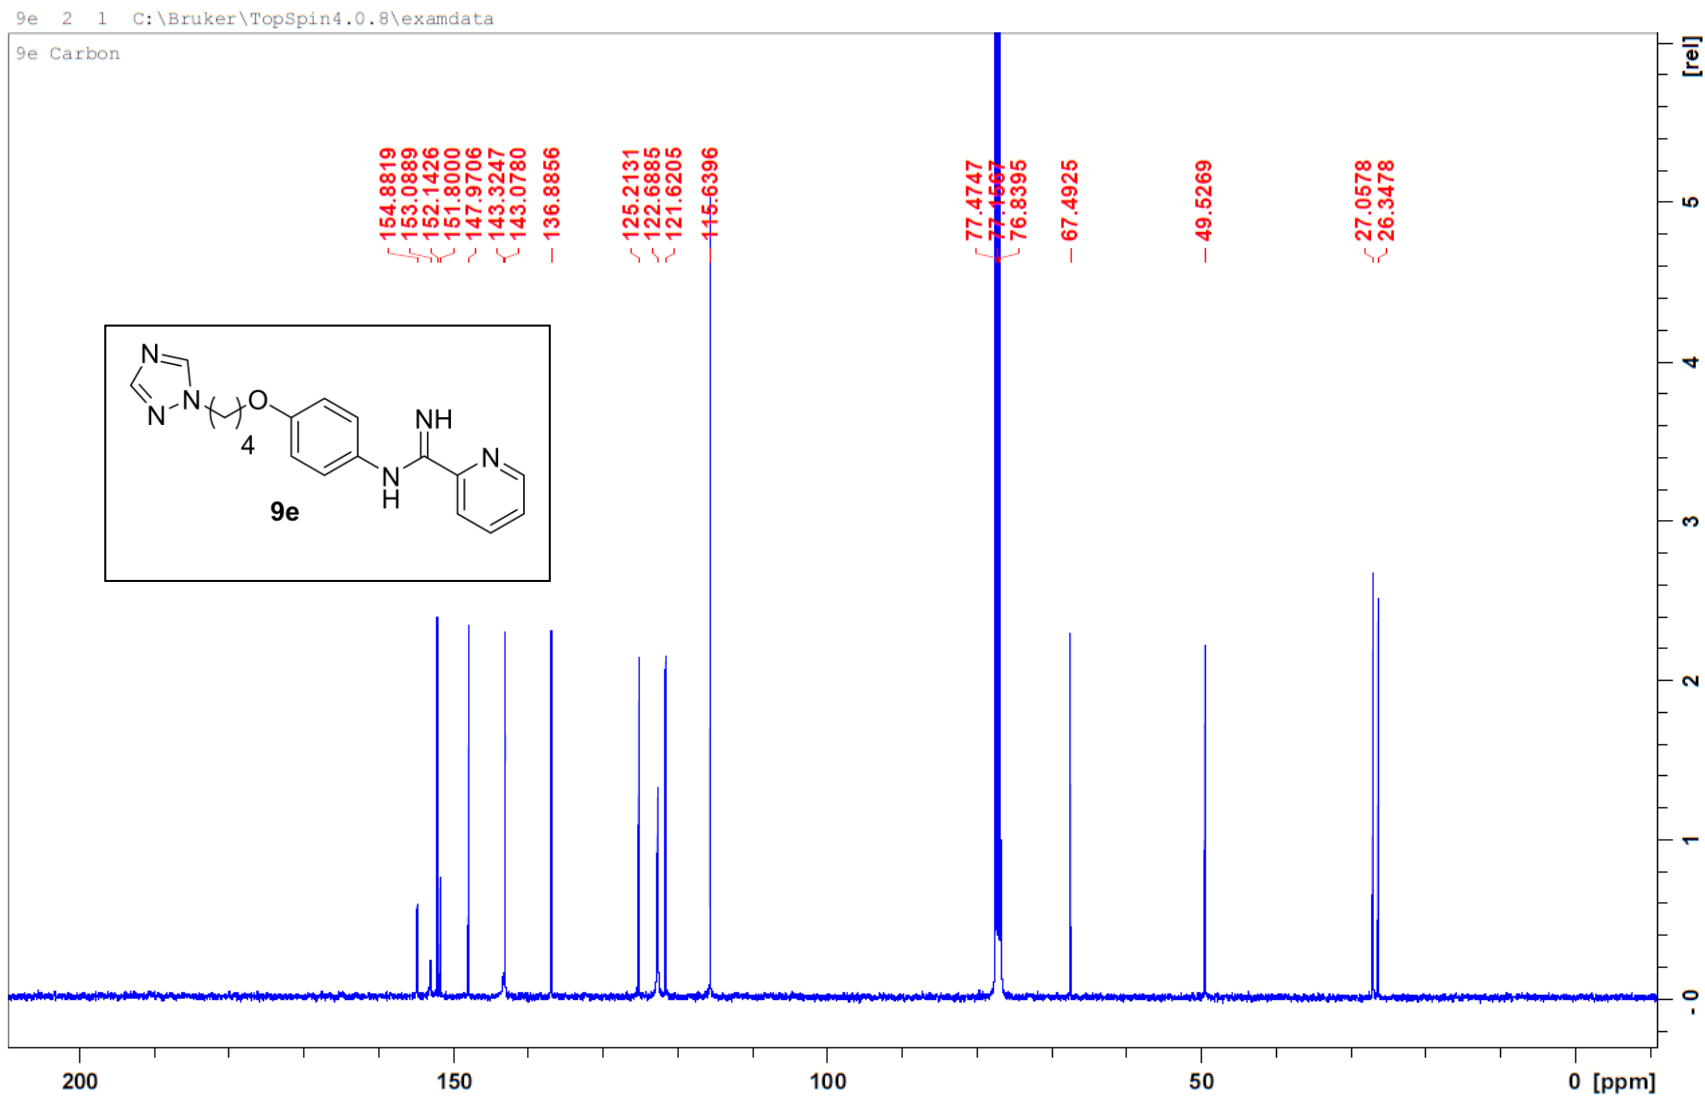

**Figure S19.**  $^{13}\text{C}$  NMR spectrum of compound **9e** (100 MHz,  $\text{CDCl}_3$ ).

9e 2 1 C:\Bruker\TopSpin4.0.8\examdata

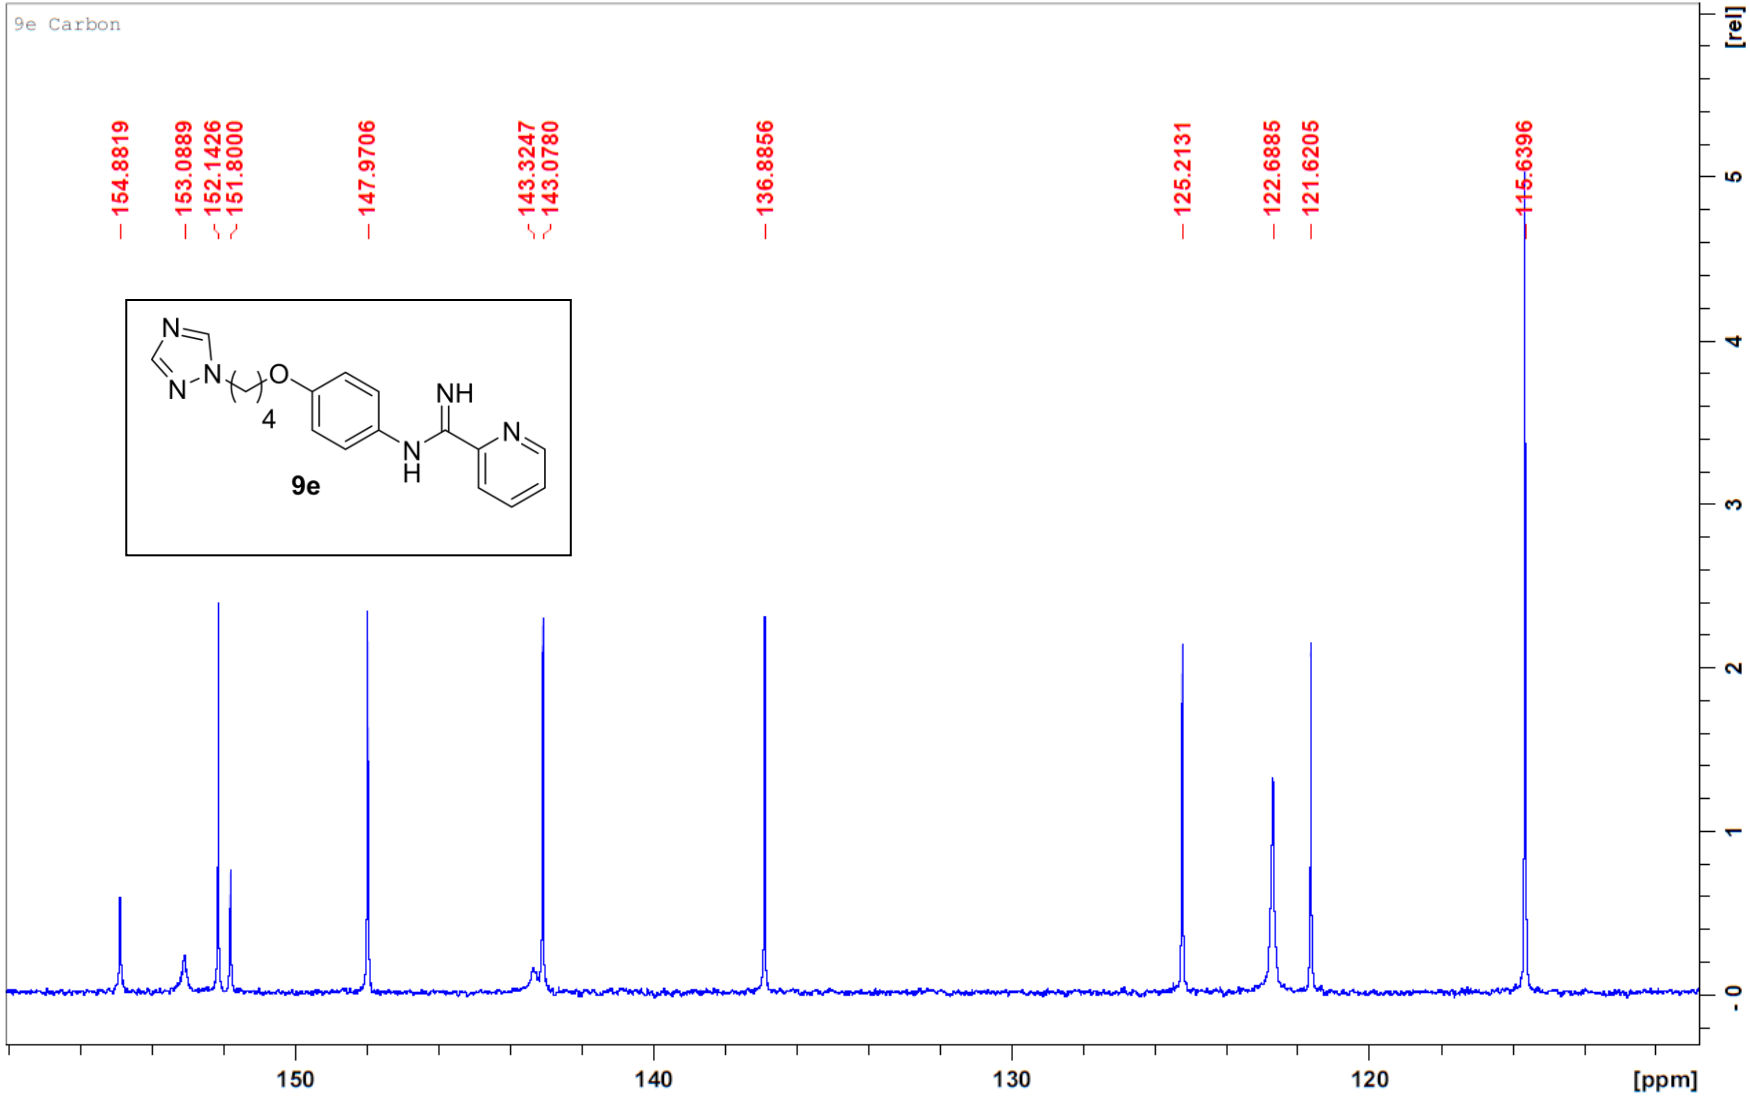

**Figure S20.** Expanded  $^{13}\text{C}$  NMR spectrum of compound **9e** (100 MHz,  $\text{CDCl}_3$ ).

9f 3 1 C:\Bruker\TopSpin4.0.8\examdata

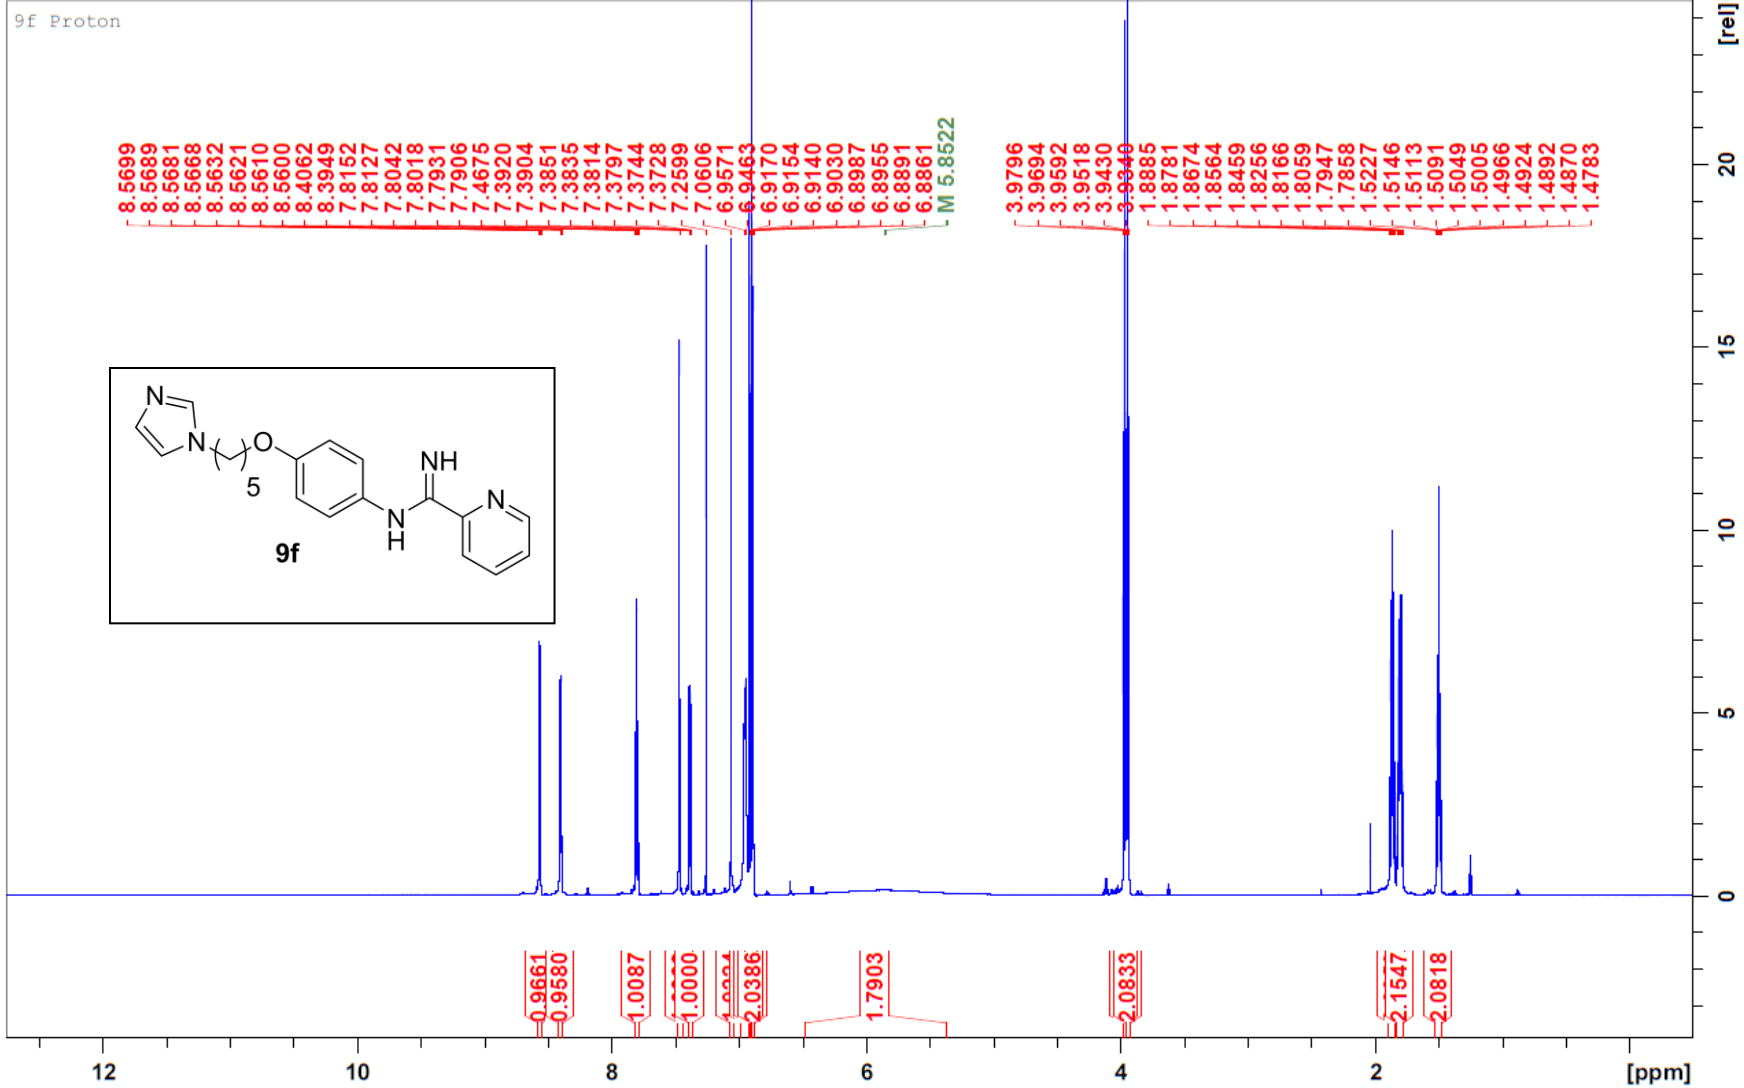

Figure S21.  $^1\text{H}$  NMR spectrum of compound **9f** (700 MHz,  $\text{CDCl}_3$ ).

9f 3 1 C:\Bruker\TopSpin4.0.8\examdata

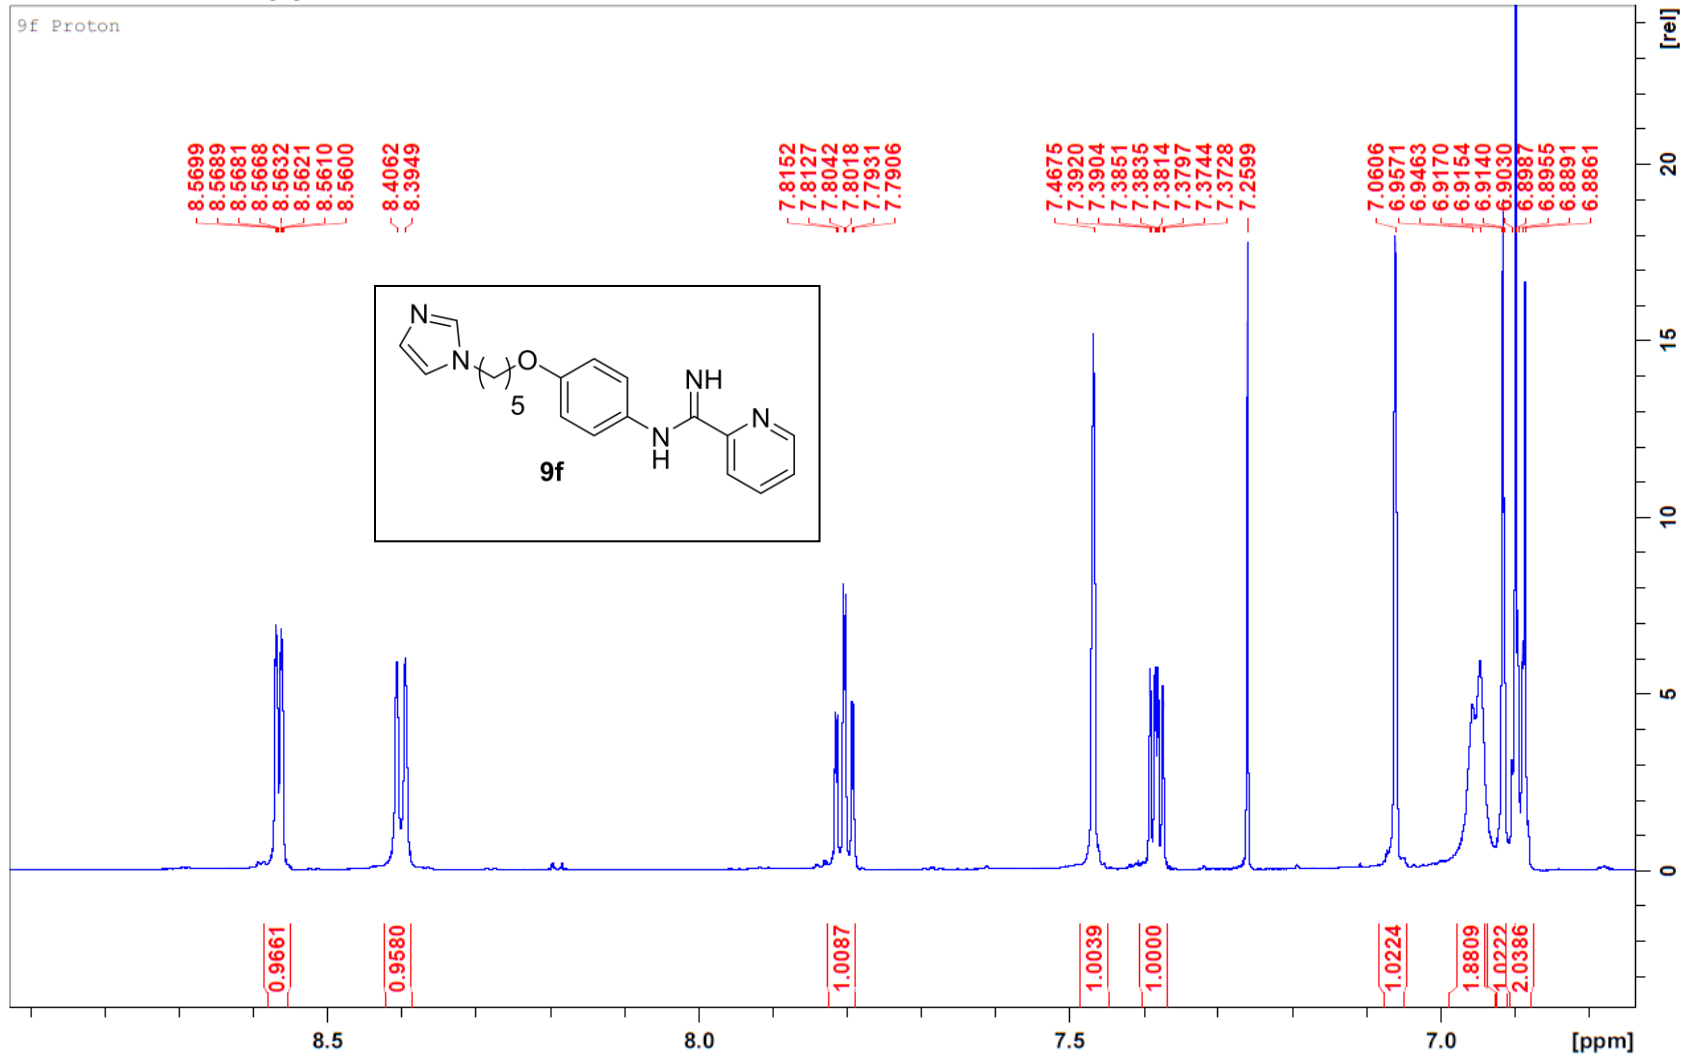

Figure S22. Expanded  $^1\text{H}$  NMR spectrum of compound 9f (700 MHz,  $\text{CDCl}_3$ ).

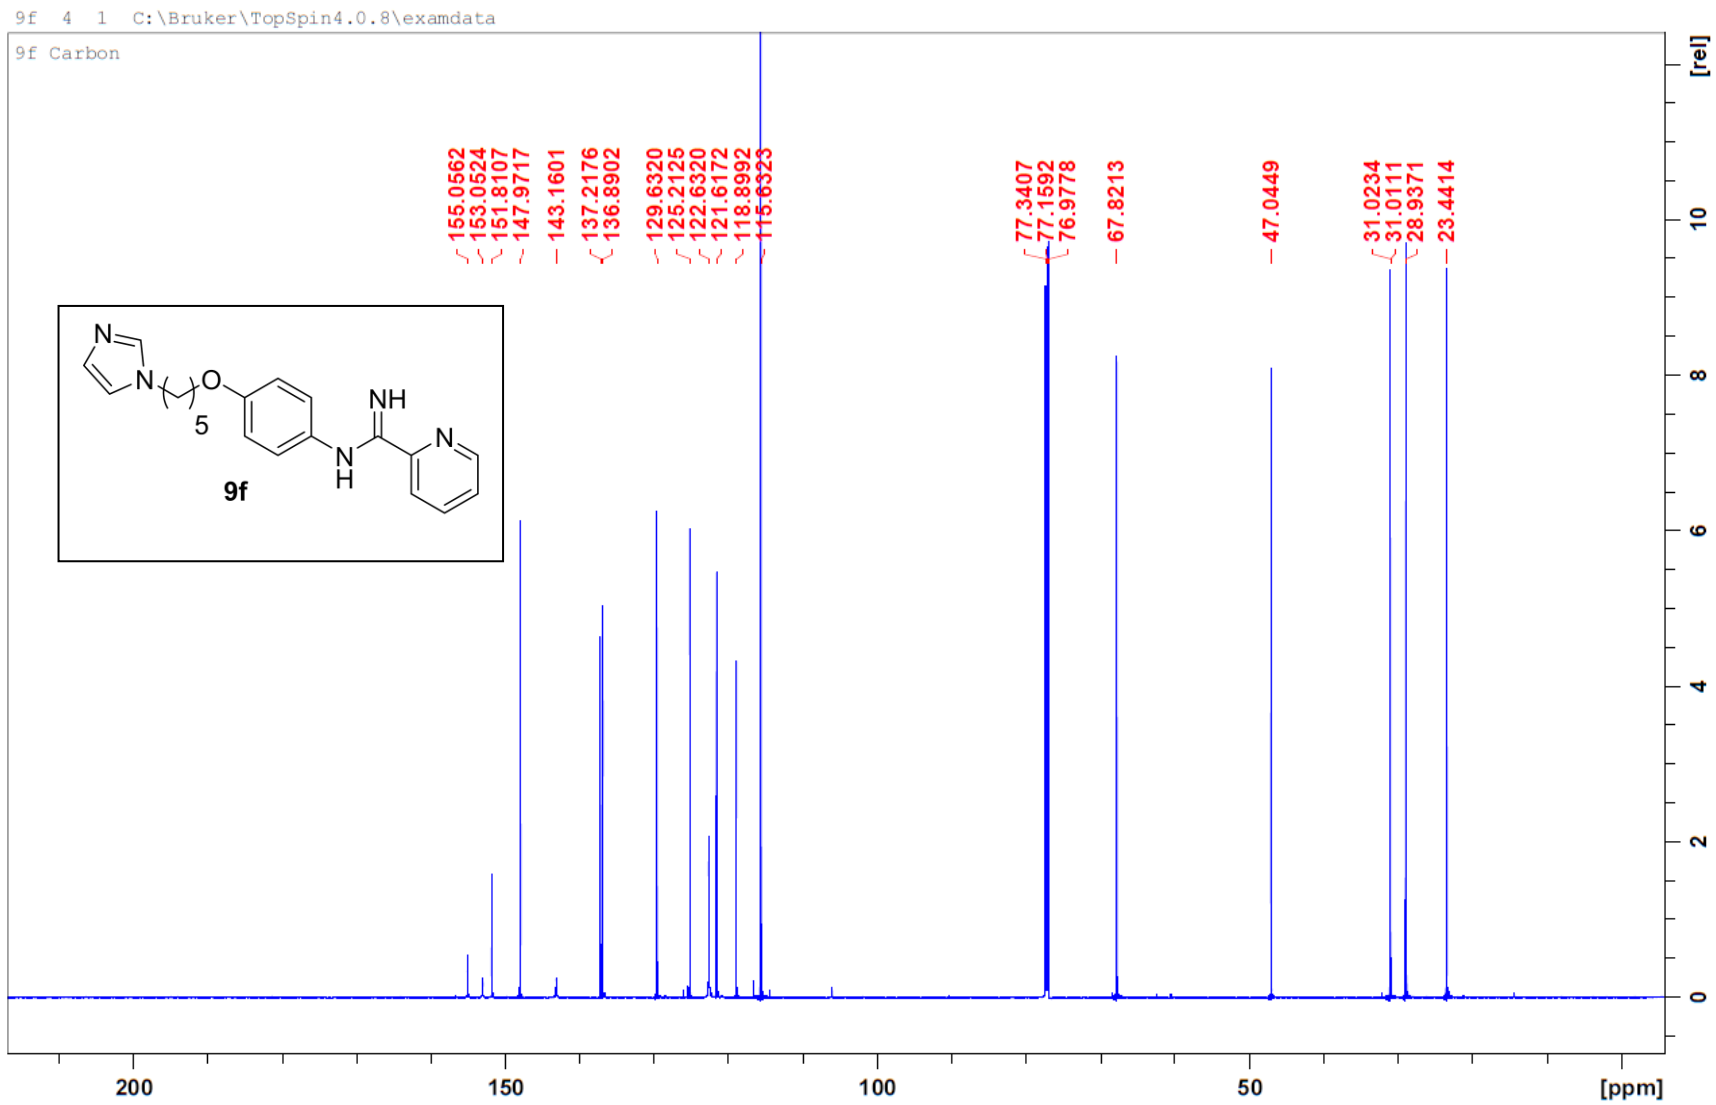

**Figure S23.**  $^{13}\text{C}$  NMR spectrum of compound **9f** (176 MHz,  $\text{CDCl}_3$ ).



9f 4 1 C:\Bruker\TopSpin4.0.8\examdata

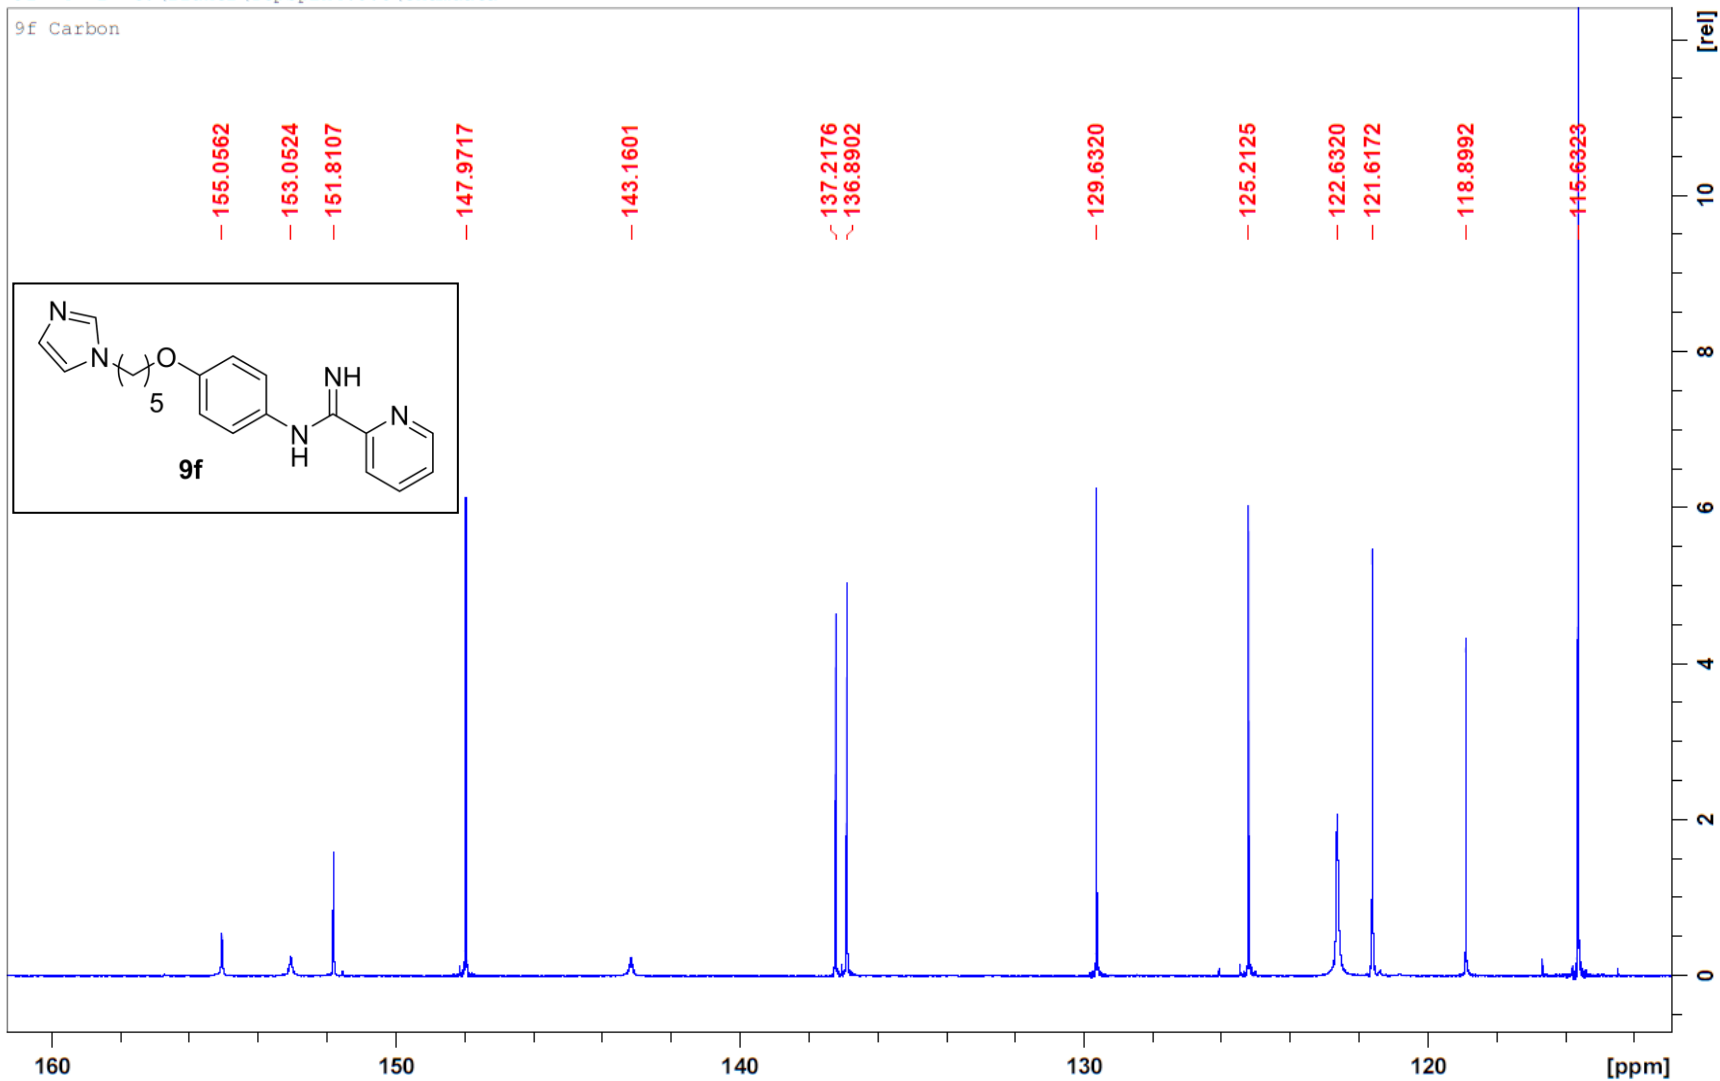

**Figure S24.** Expanded  $^{13}\text{C}$  NMR spectrum of compound **9f** (176 MHz,  $\text{CDCl}_3$ ).

9g 1 1 C:\Bruker\TopSpin4.0.8\examdata

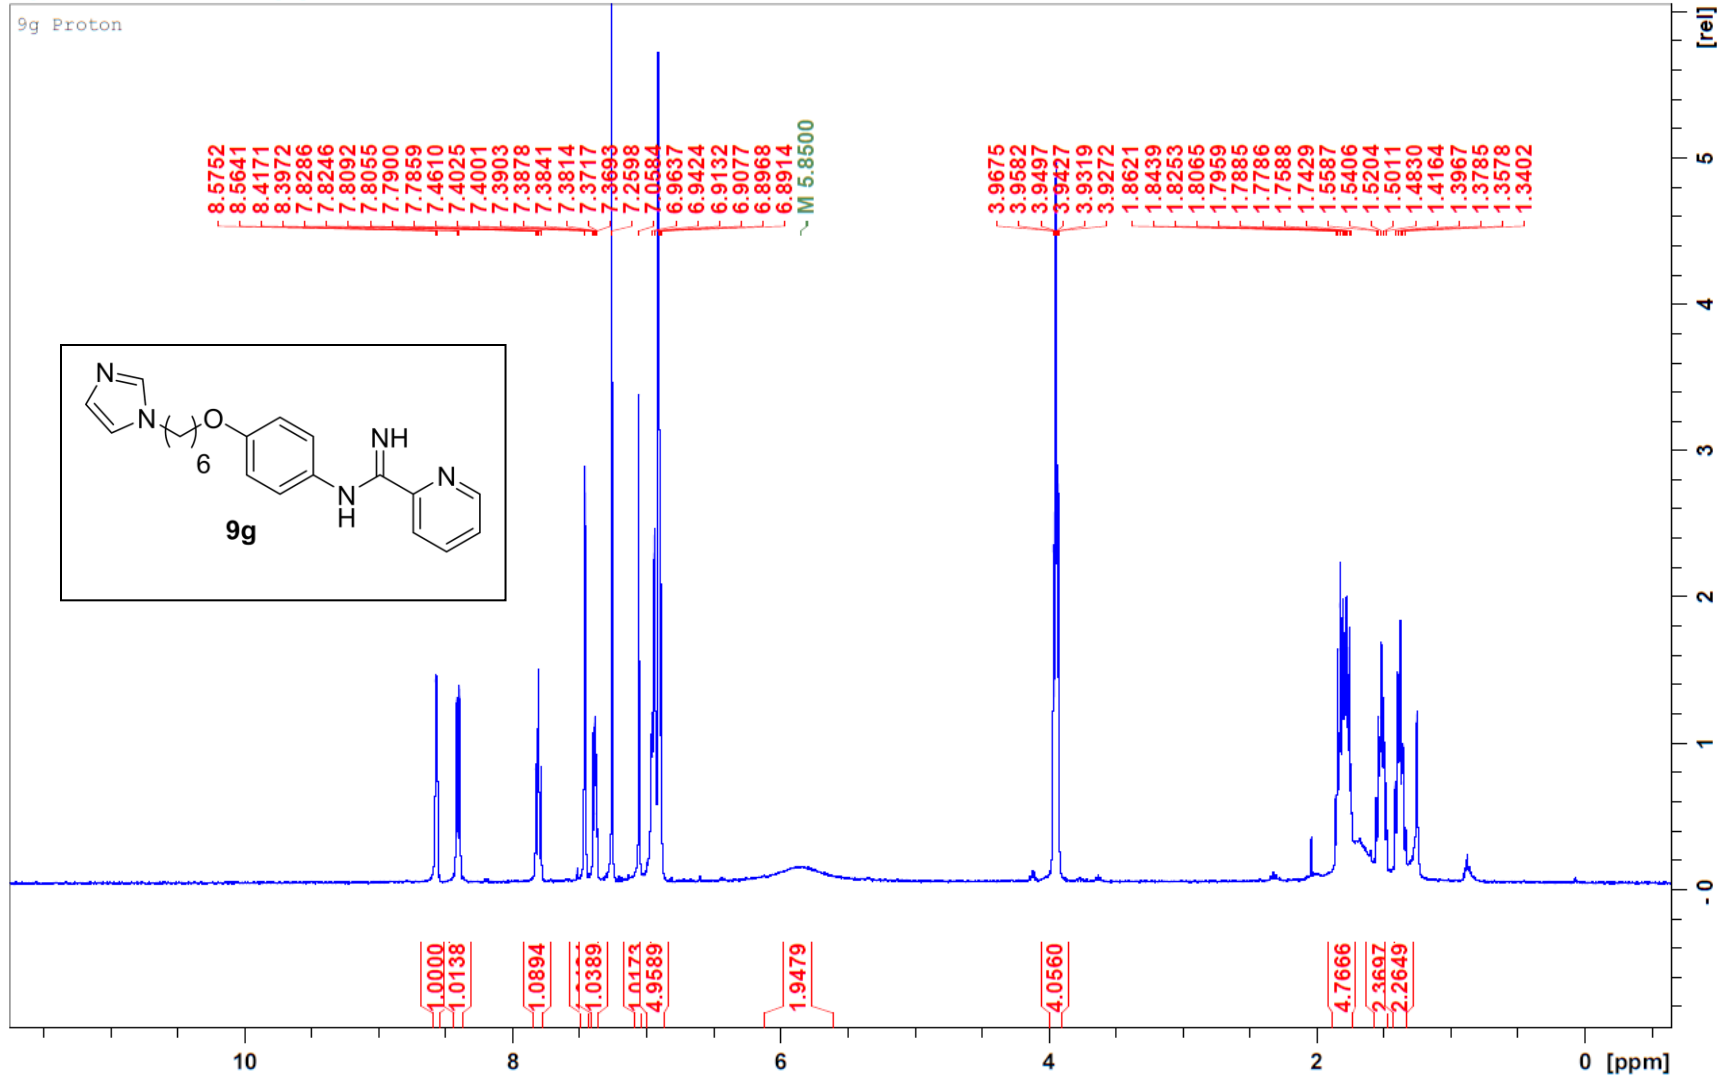

Figure S25.  $^1\text{H}$  NMR spectrum of compound **9g** (400 MHz,  $\text{CDCl}_3$ ).

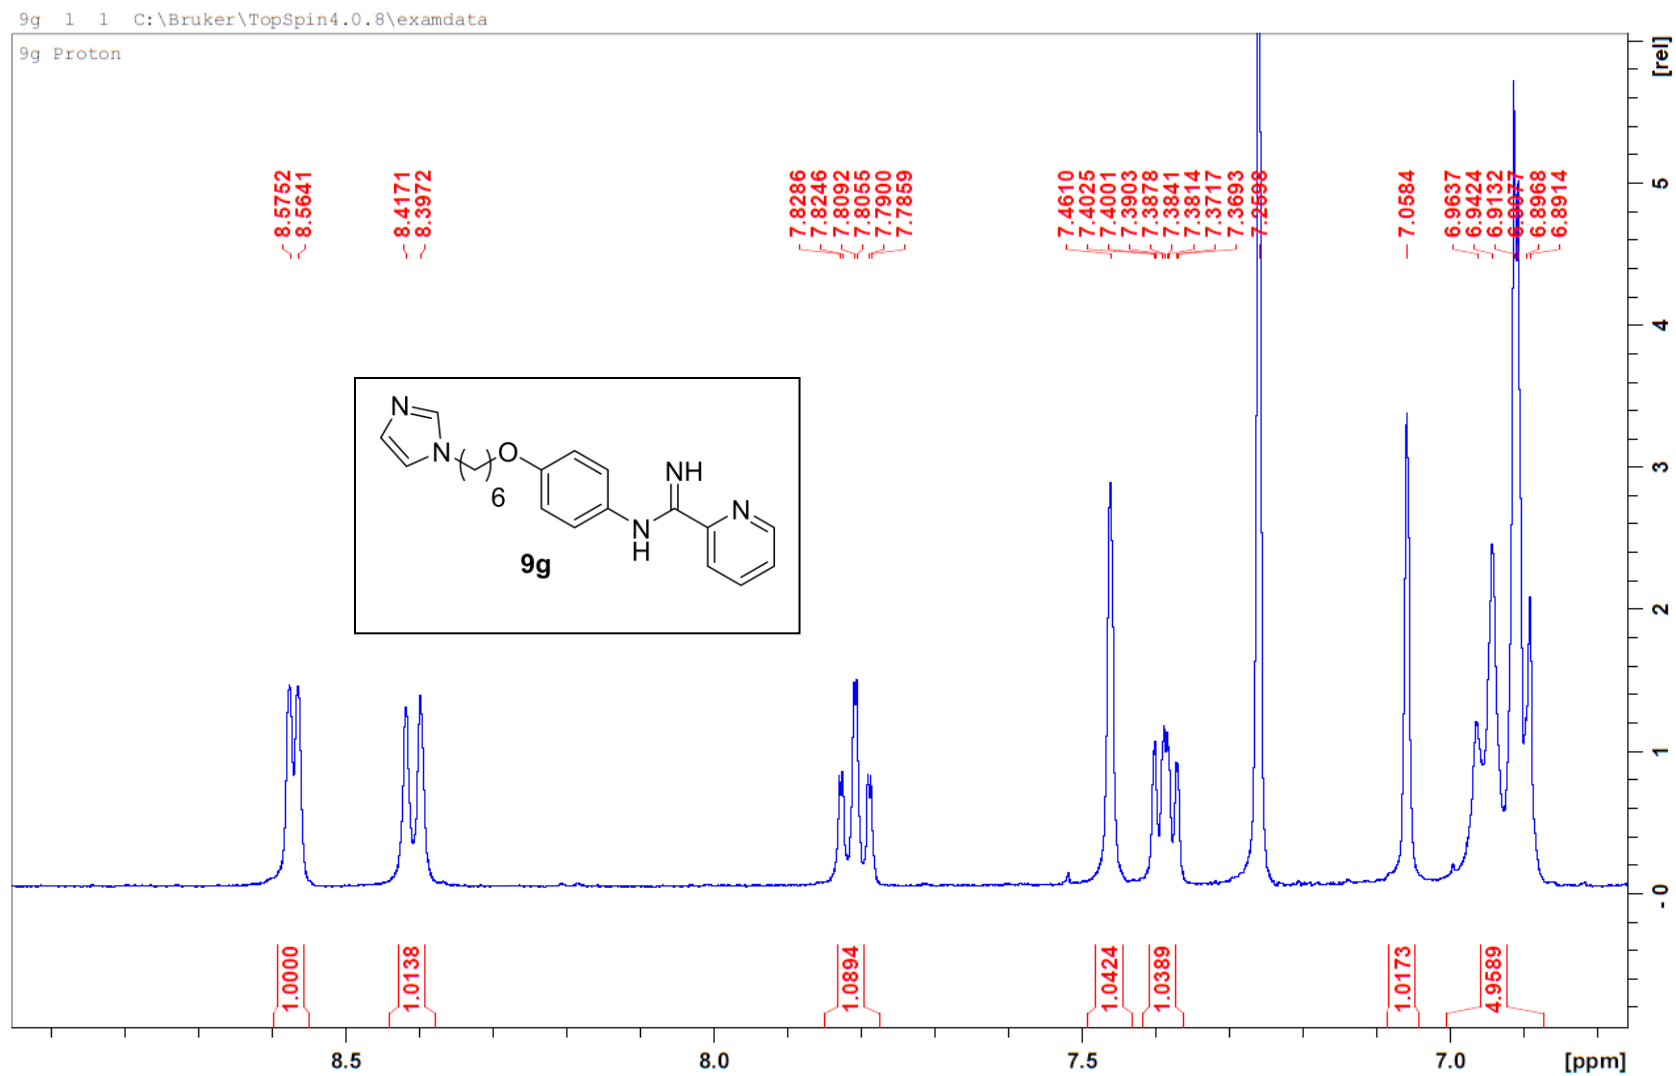

Figure S26. Expanded  $^1\text{H}$  NMR spectrum of compound **9g** (400 MHz,  $\text{CDCl}_3$ ).

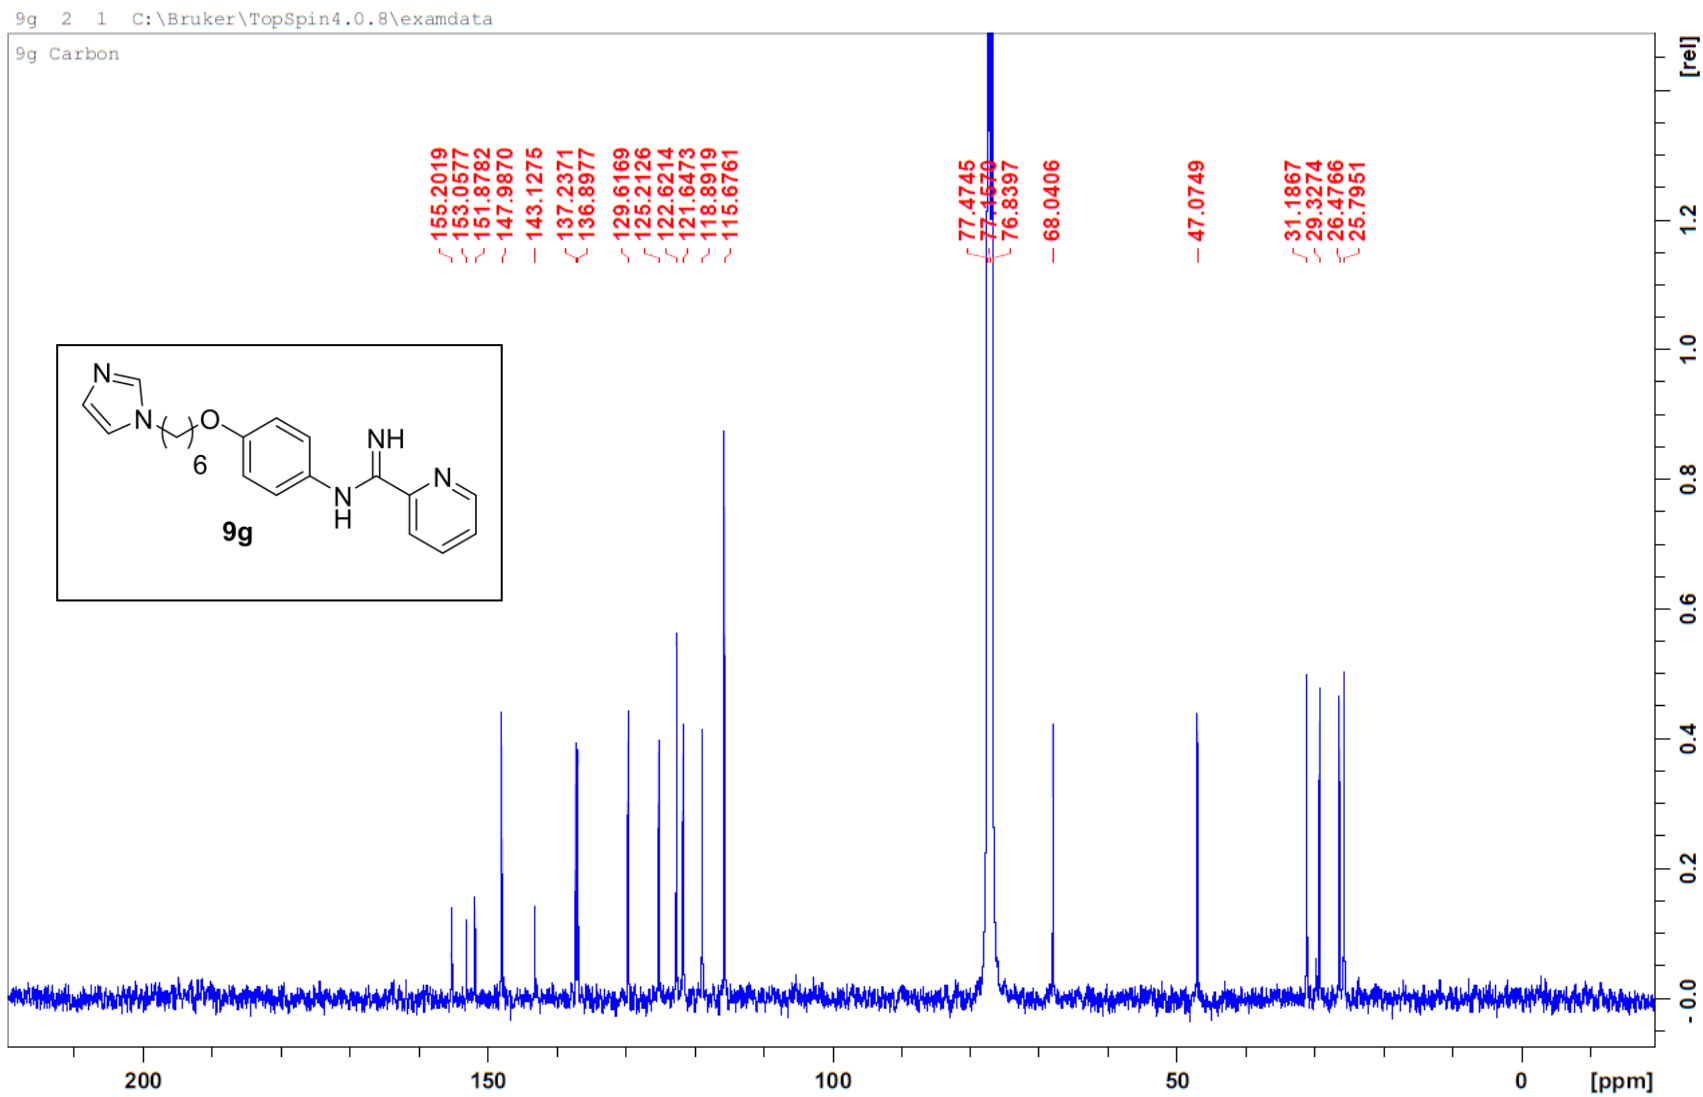

**Figure S27.**  $^{13}\text{C}$  NMR spectrum of compound **9g** (100 MHz,  $\text{CDCl}_3$ ).

9g 2 1 C:\Bruker\TopSpin4.0.8\examdata

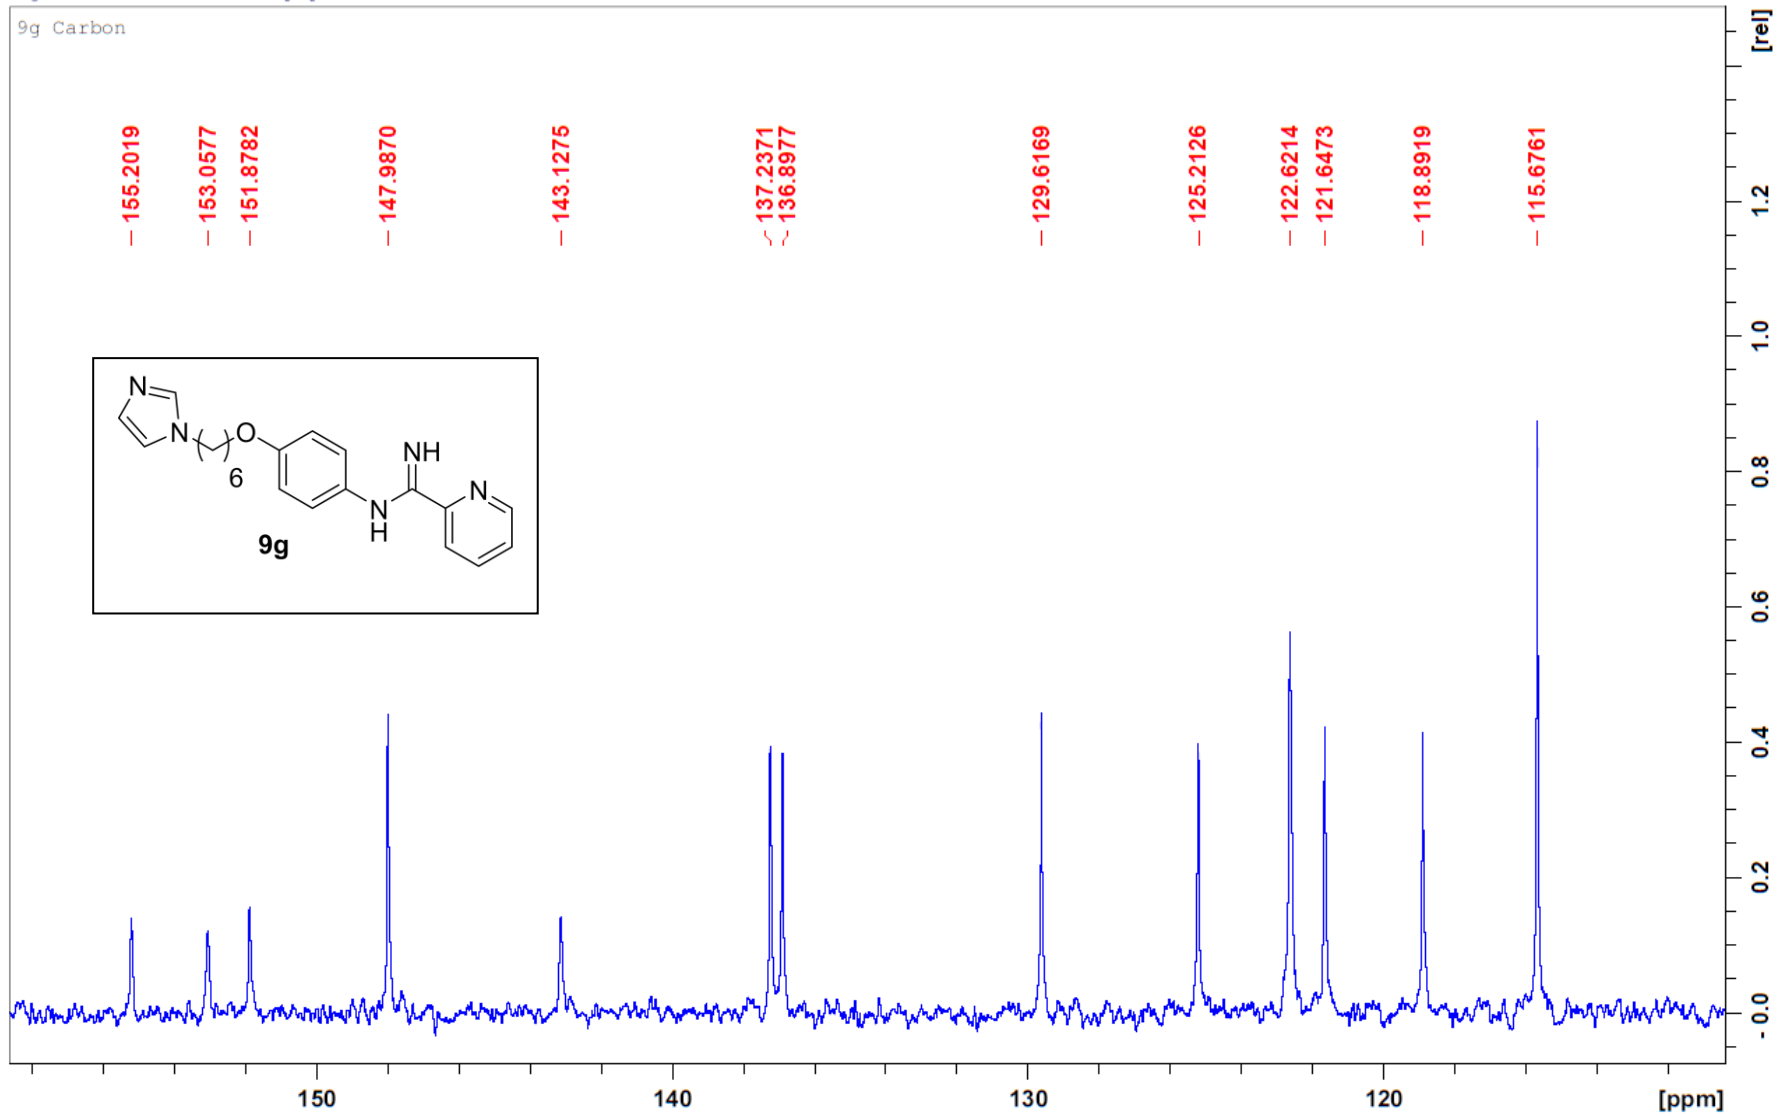

**Figure S28.** Expanded  $^{13}\text{C}$  NMR spectrum of compound **9g** (100 MHz,  $\text{CDCl}_3$ ).

9h 1 1 C:\Bruker\TopSpin4.0.8\examdata

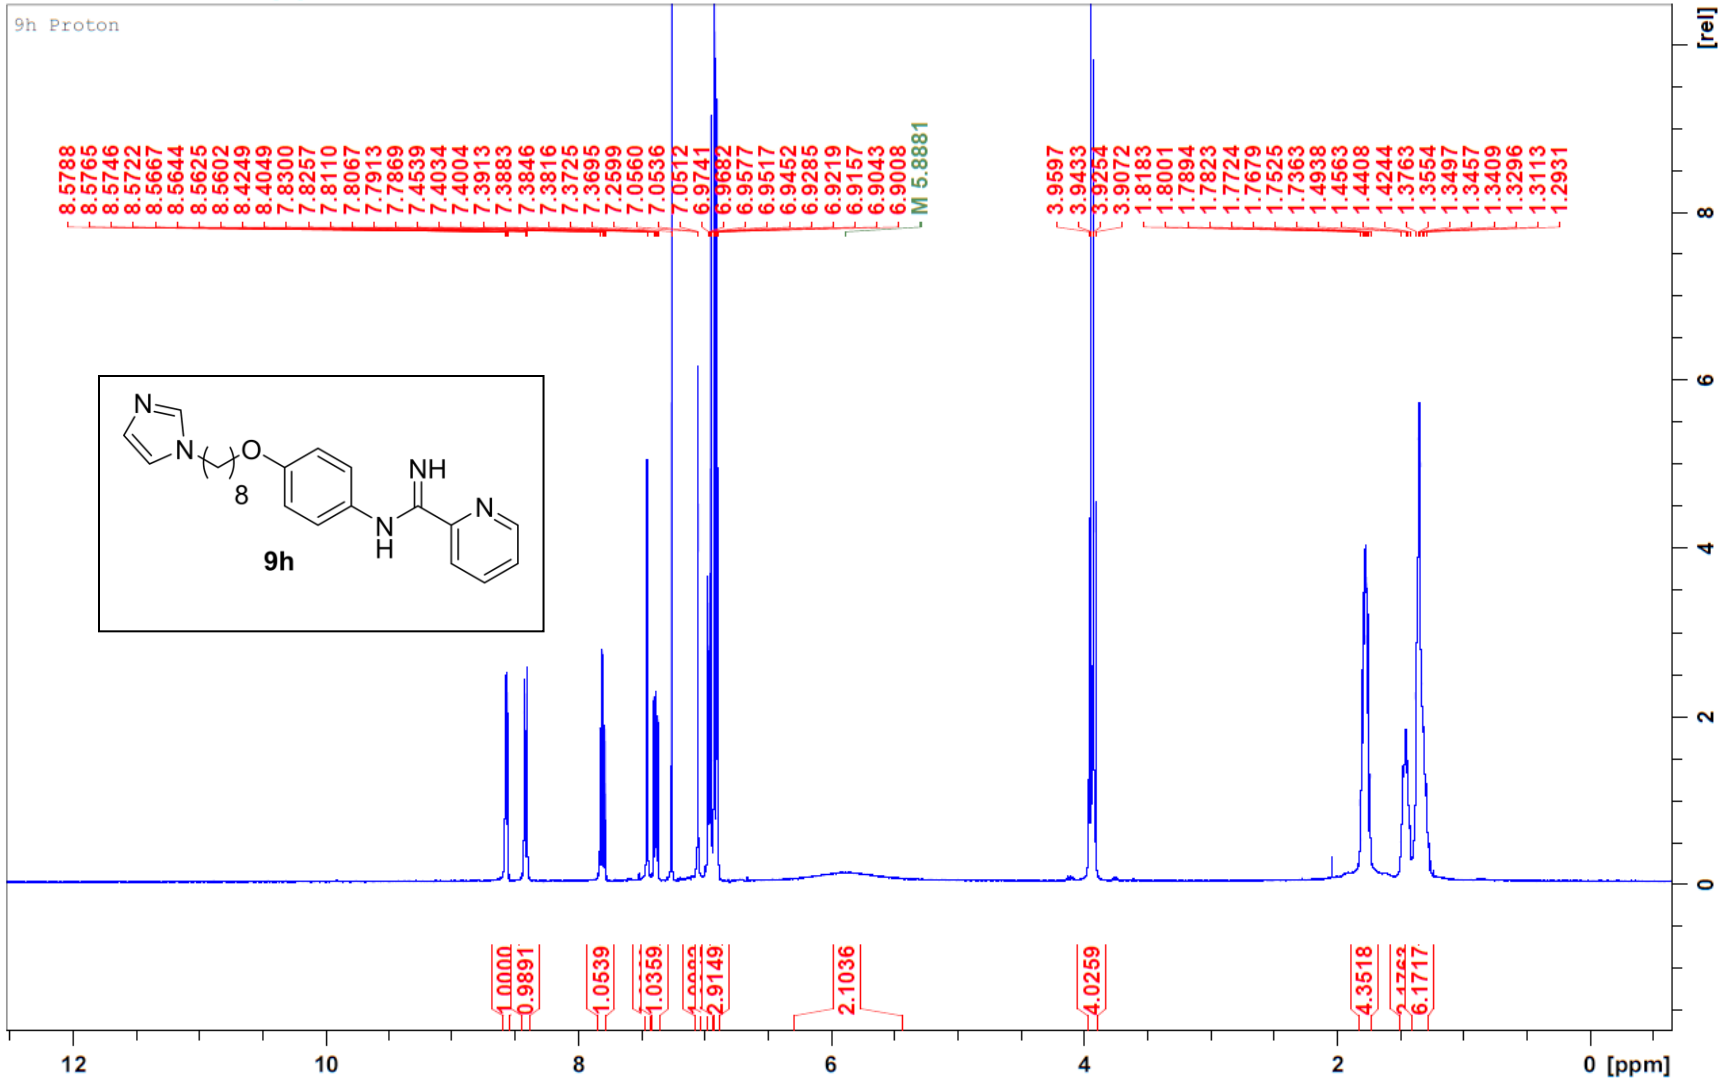

Figure S29.  $^1\text{H}$  NMR spectrum of compound 9h (400 MHz,  $\text{CDCl}_3$ ).

9h 1 1 C:\Bruker\TopSpin4.0.8\examdata

9h Proton

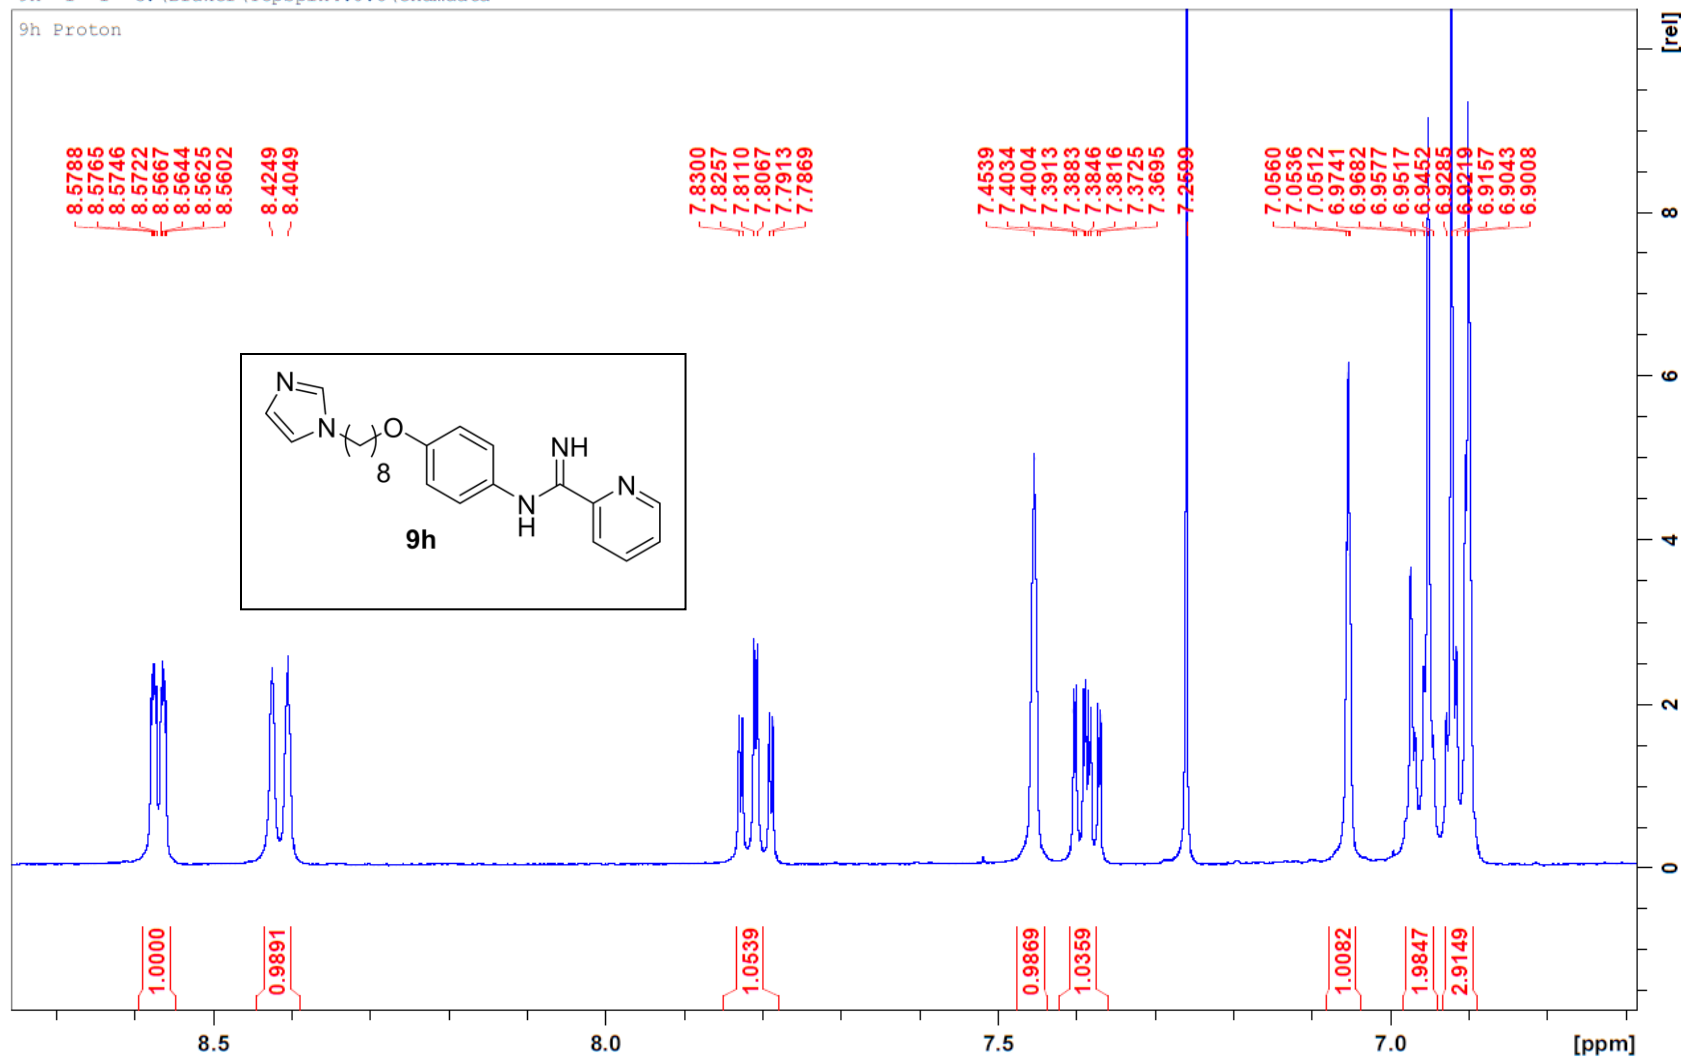

**Figure S30.** Expanded <sup>1</sup>H NMR spectrum of compound **9h** (400 MHz, CDCl<sub>3</sub>).

9h 2 1 C:\Bruker\TopSpin4.0.8\examdata

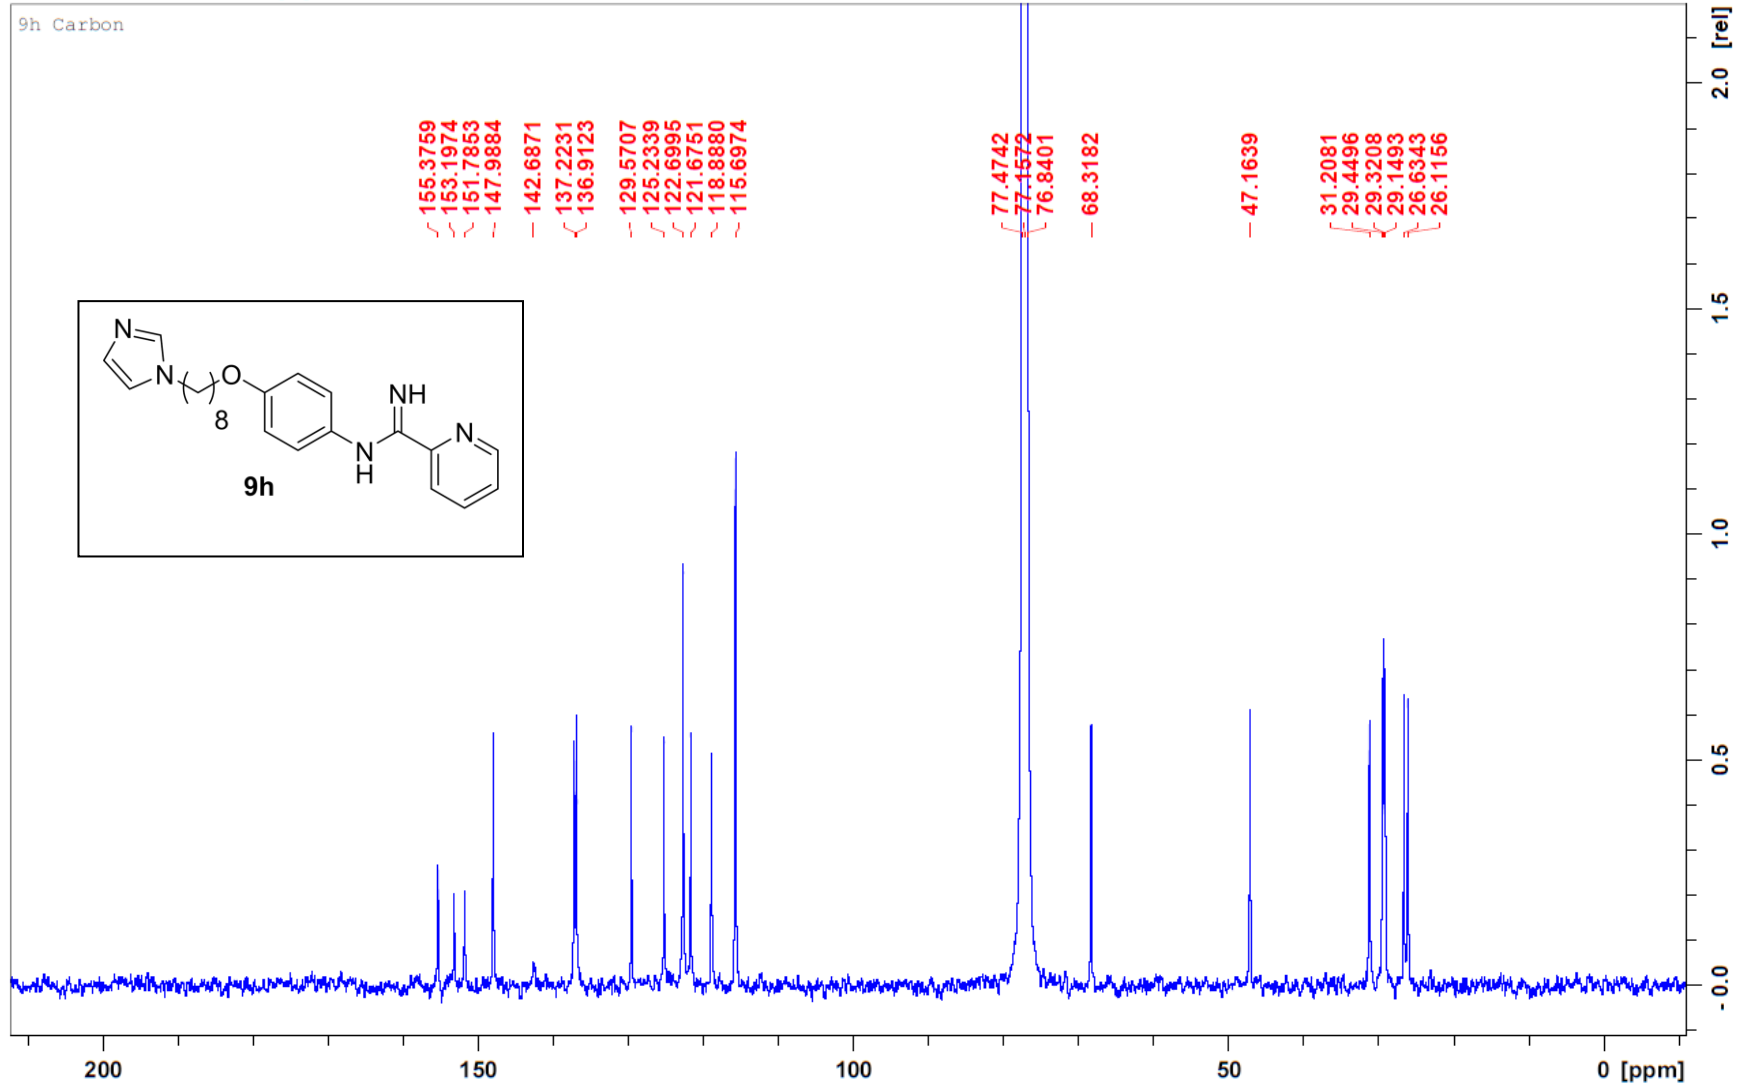

Figure S31. <sup>13</sup>C NMR spectrum of compound **9h** (100 MHz, CDCl<sub>3</sub>).



9h 2 1 C:\Bruker\TopSpin4.0.8\examdata

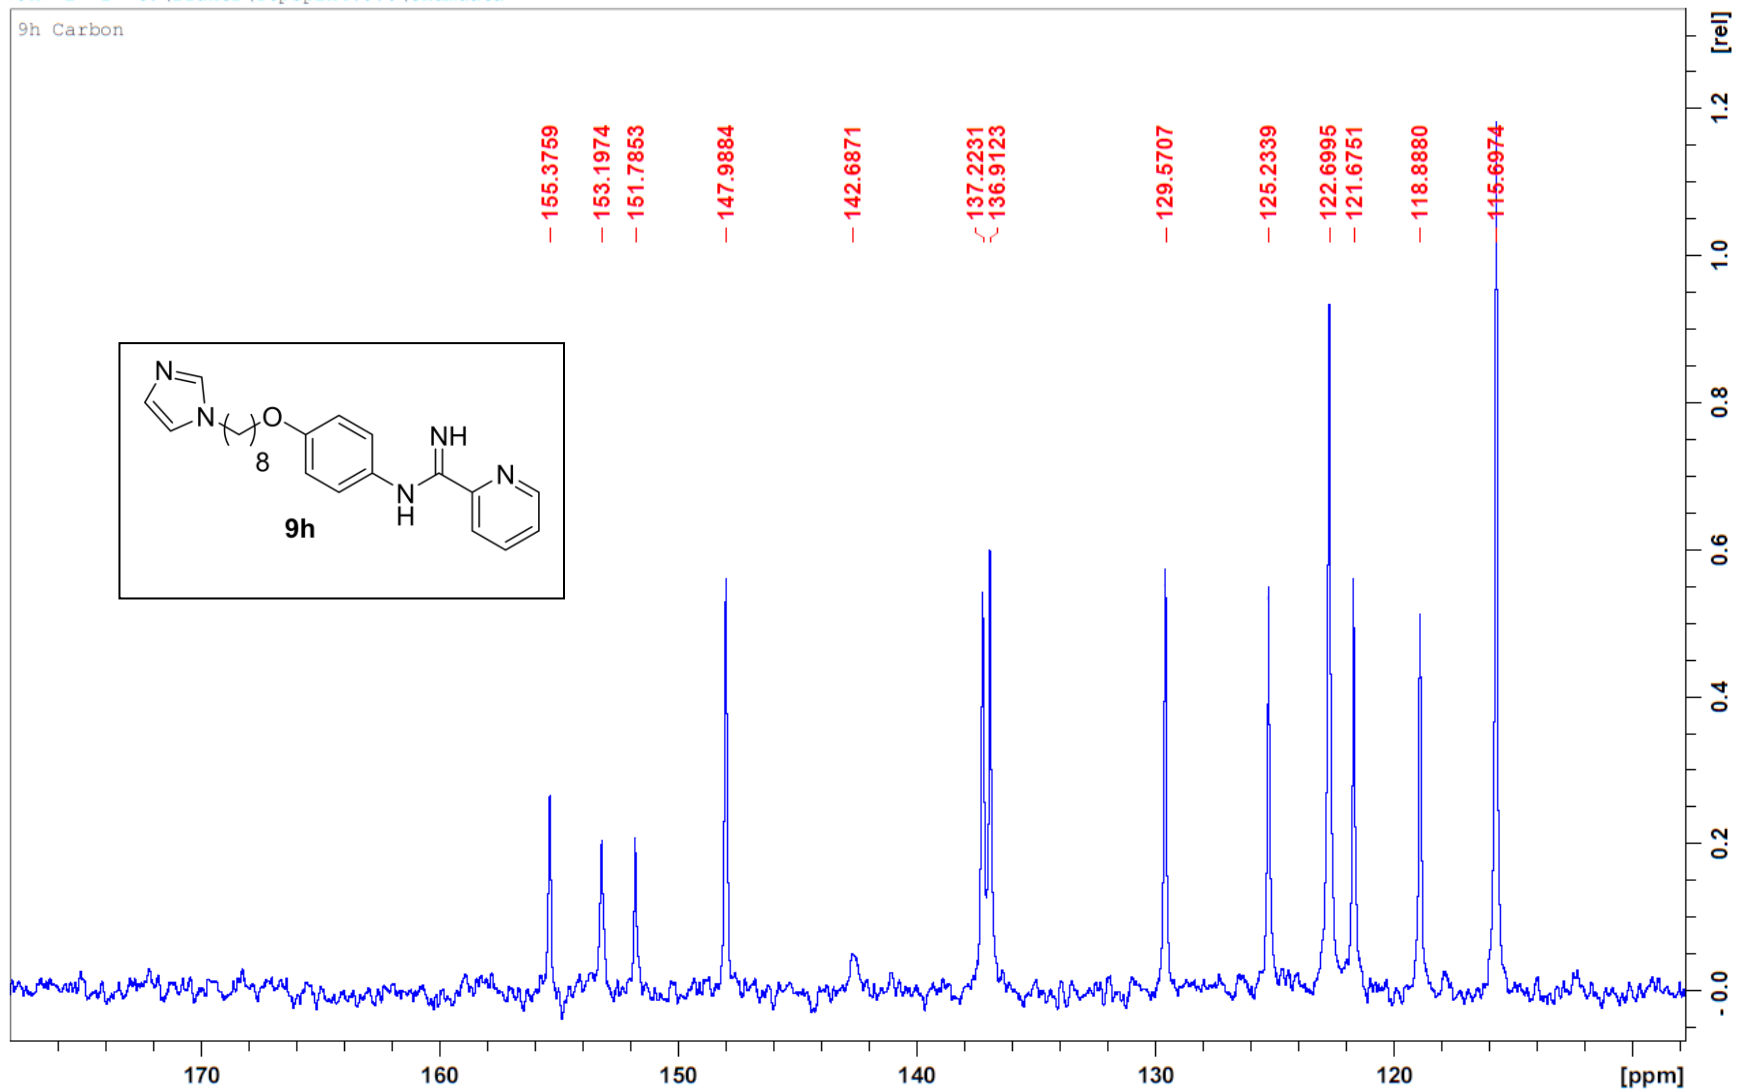

**Figure S32.** Expanded  $^{13}\text{C}$  NMR spectrum of compound **9h** (100 MHz,  $\text{CDCl}_3$ ).

9i 1 1 C:\Bruker\TopSpin4.0.8\examdata

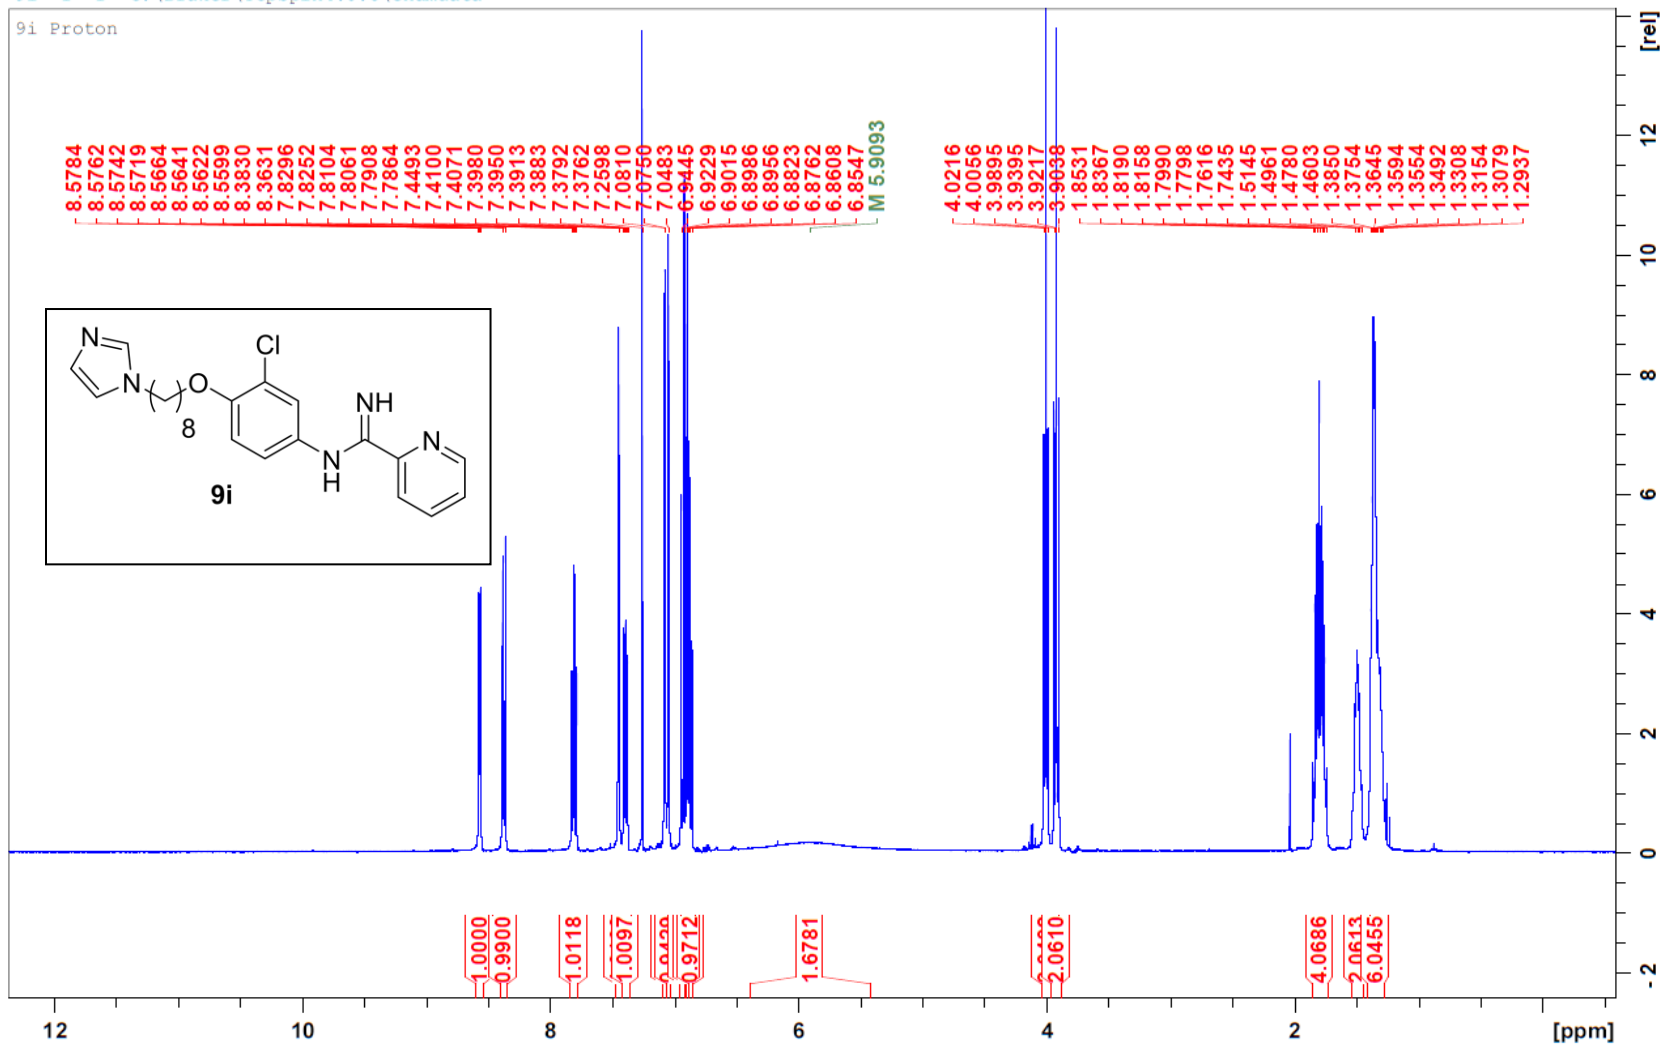

Figure S33.  $^1\text{H}$  NMR spectrum of compound **9i** (400 MHz,  $\text{CDCl}_3$ ).

9i 1 1 C:\Bruker\TopSpin4.0.8\examdata

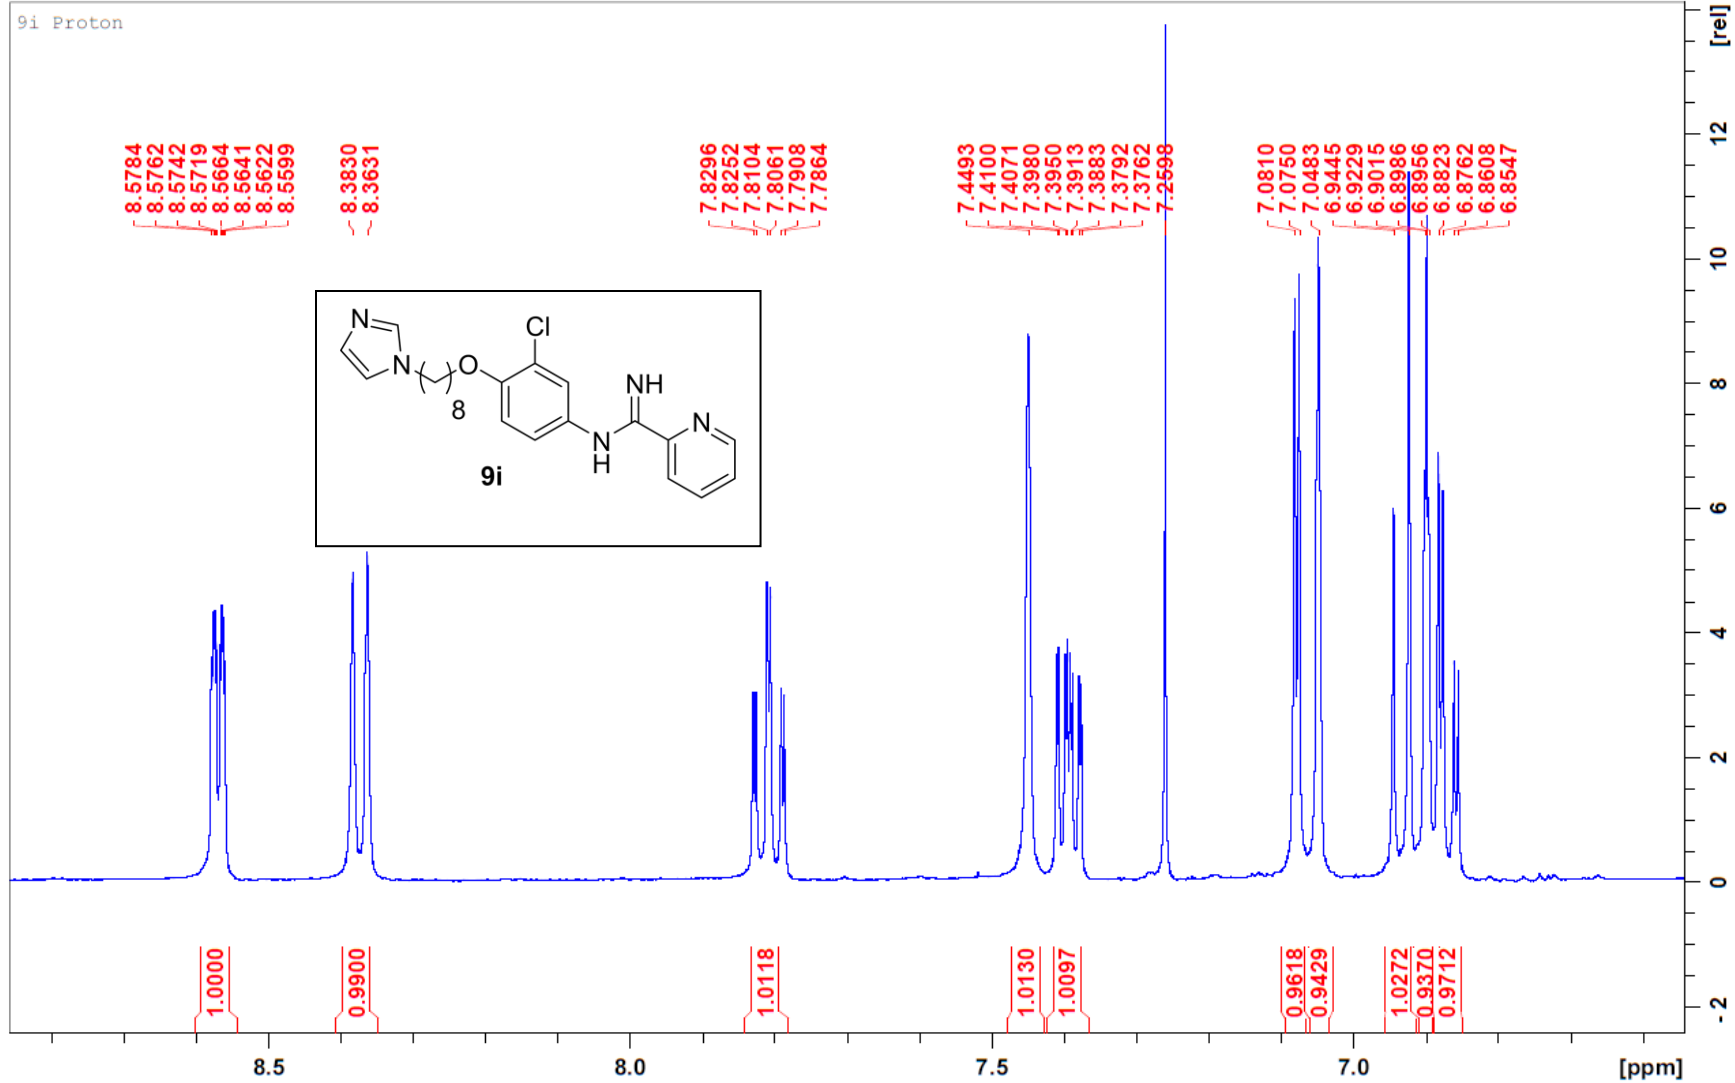

**Figure S34.** Expanded  $^1\text{H}$  NMR spectrum of compound **9i** (400 MHz,  $\text{CDCl}_3$ ).

9i 2 1 C:\Bruker\TopSpin4.0.8\examdata

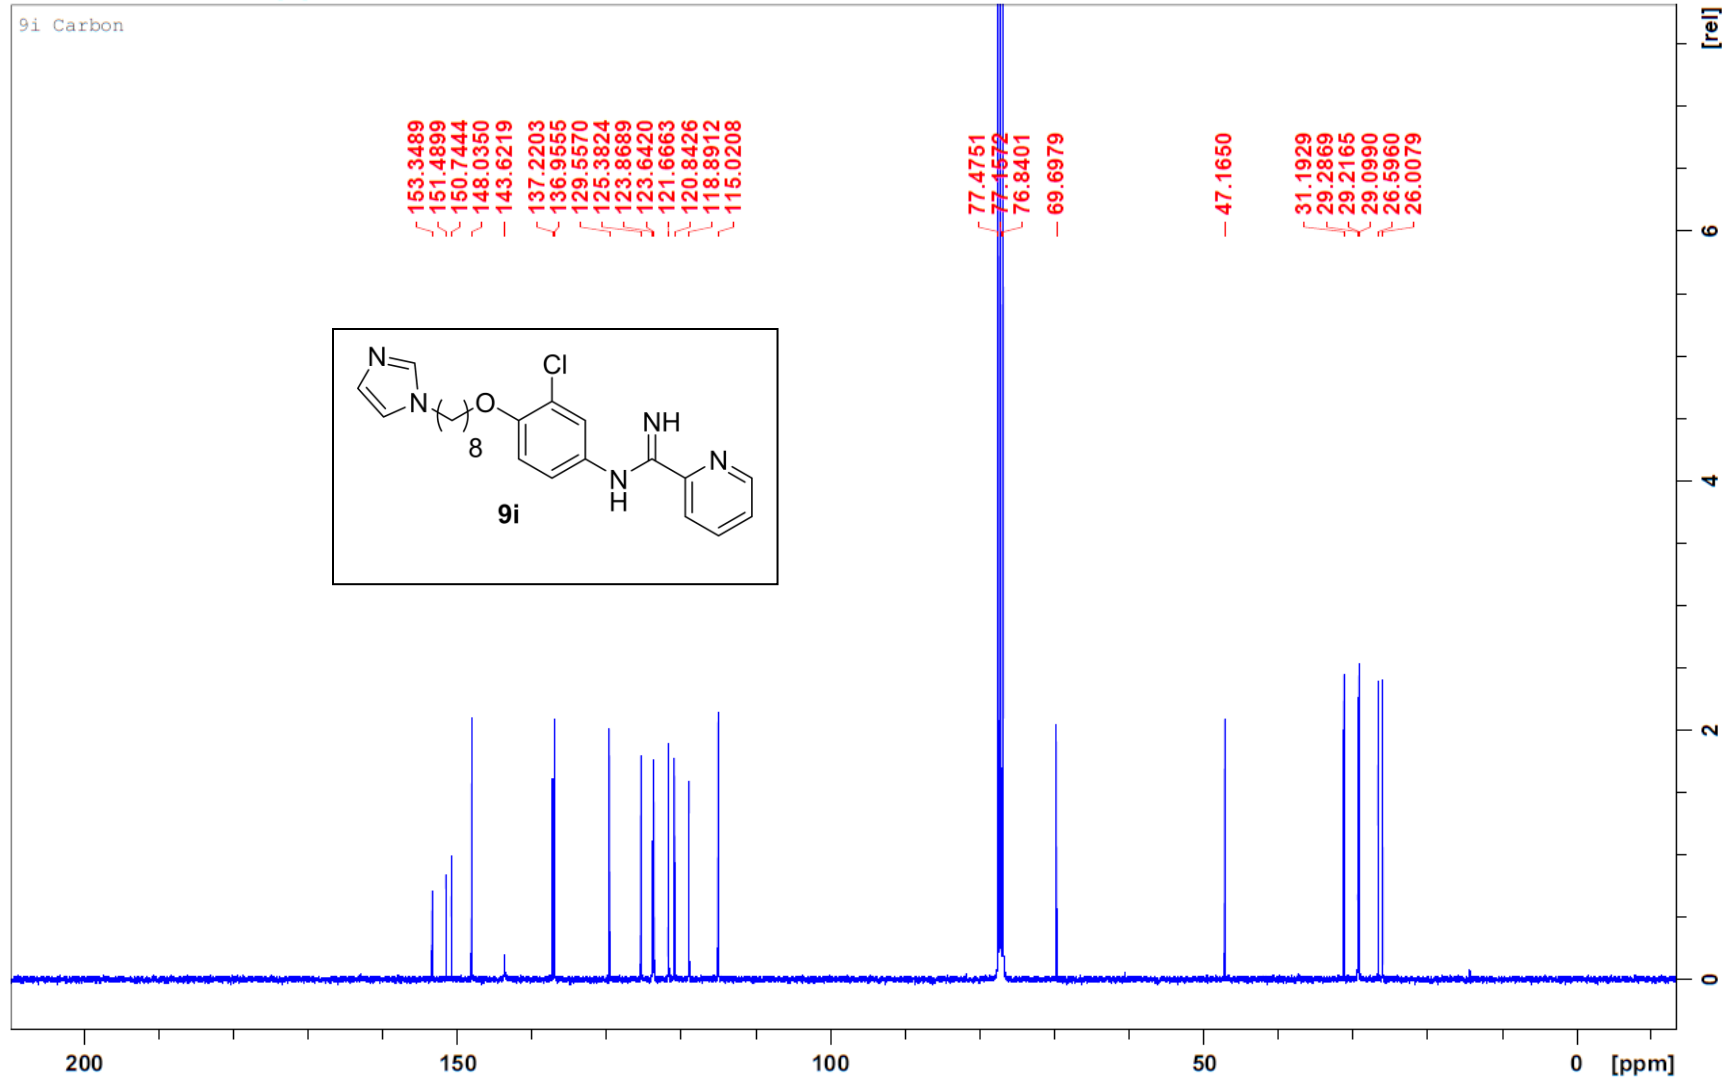

Figure S35.  $^{13}\text{C}$  NMR spectrum of compound **9i** (100 MHz,  $\text{CDCl}_3$ ).

9i 2 1 C:\Bruker\TopSpin4.0.8\examdata

9i Carbon

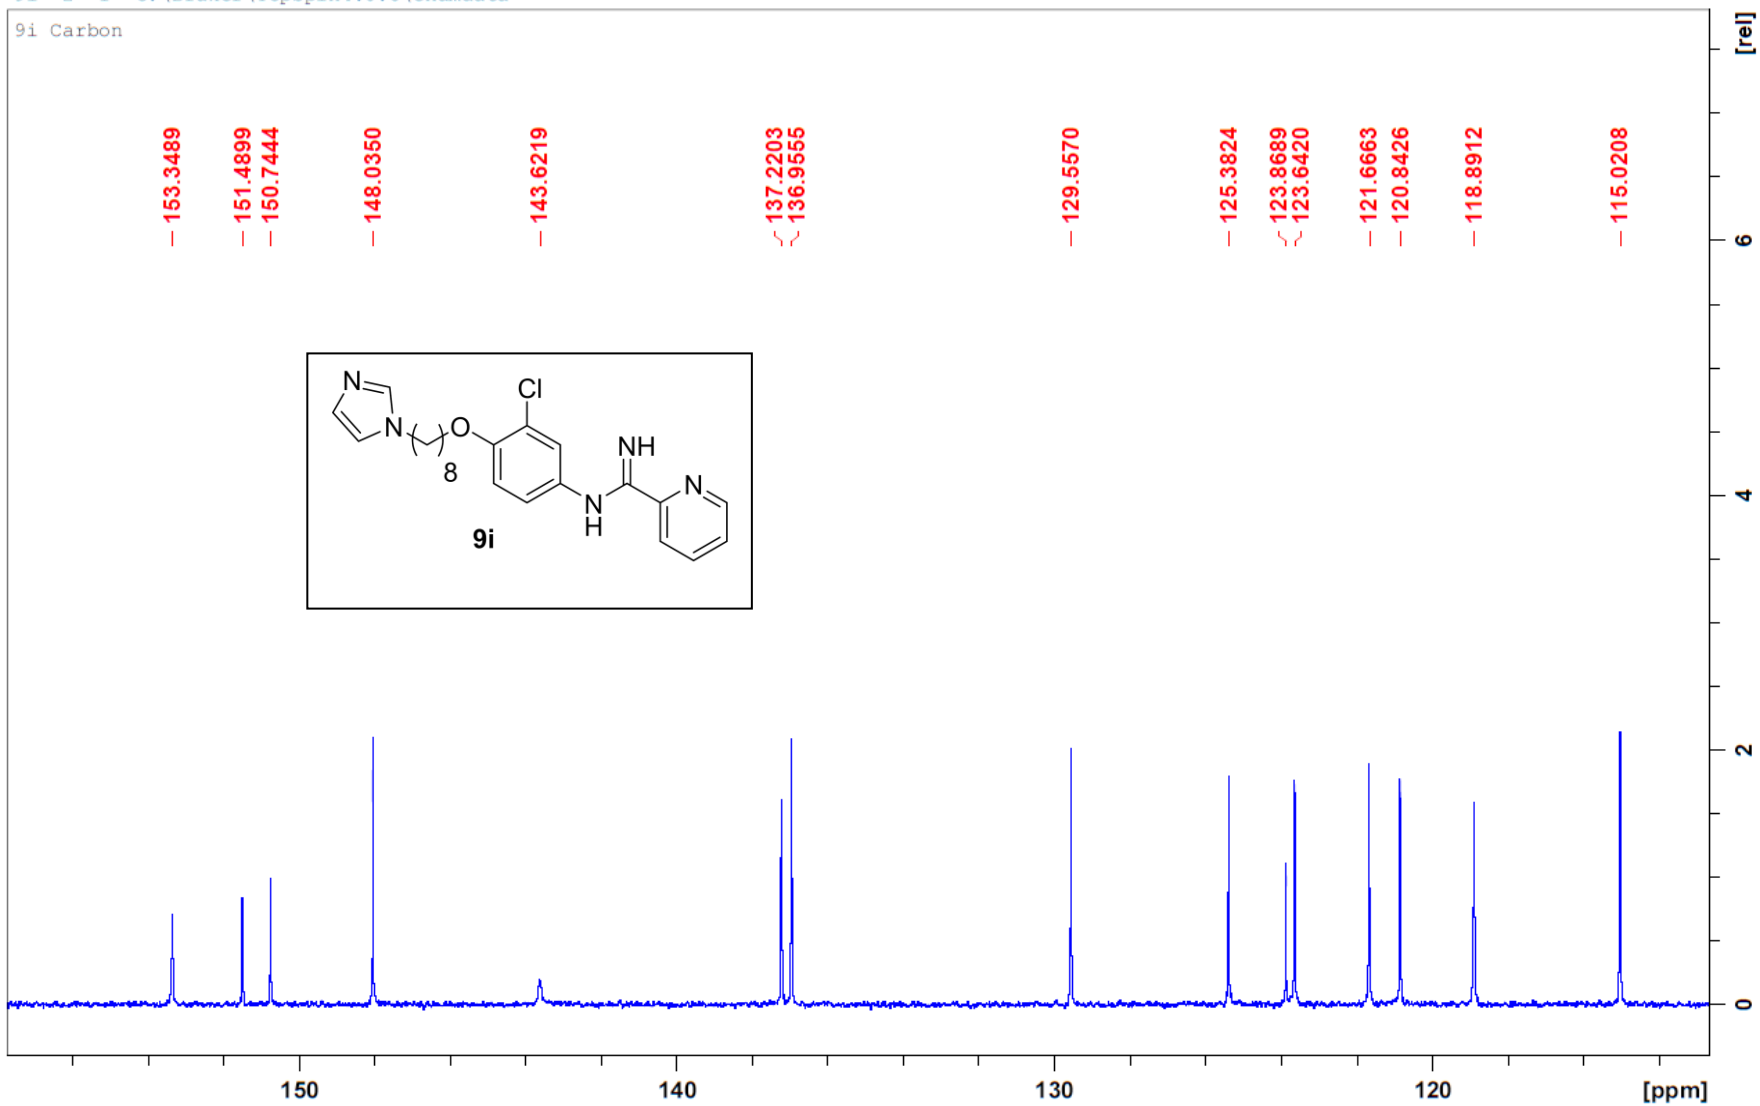

Figure S36. Expanded  $^{13}\text{C}$  NMR spectrum of compound **9i** (100 MHz,  $\text{CDCl}_3$ ).

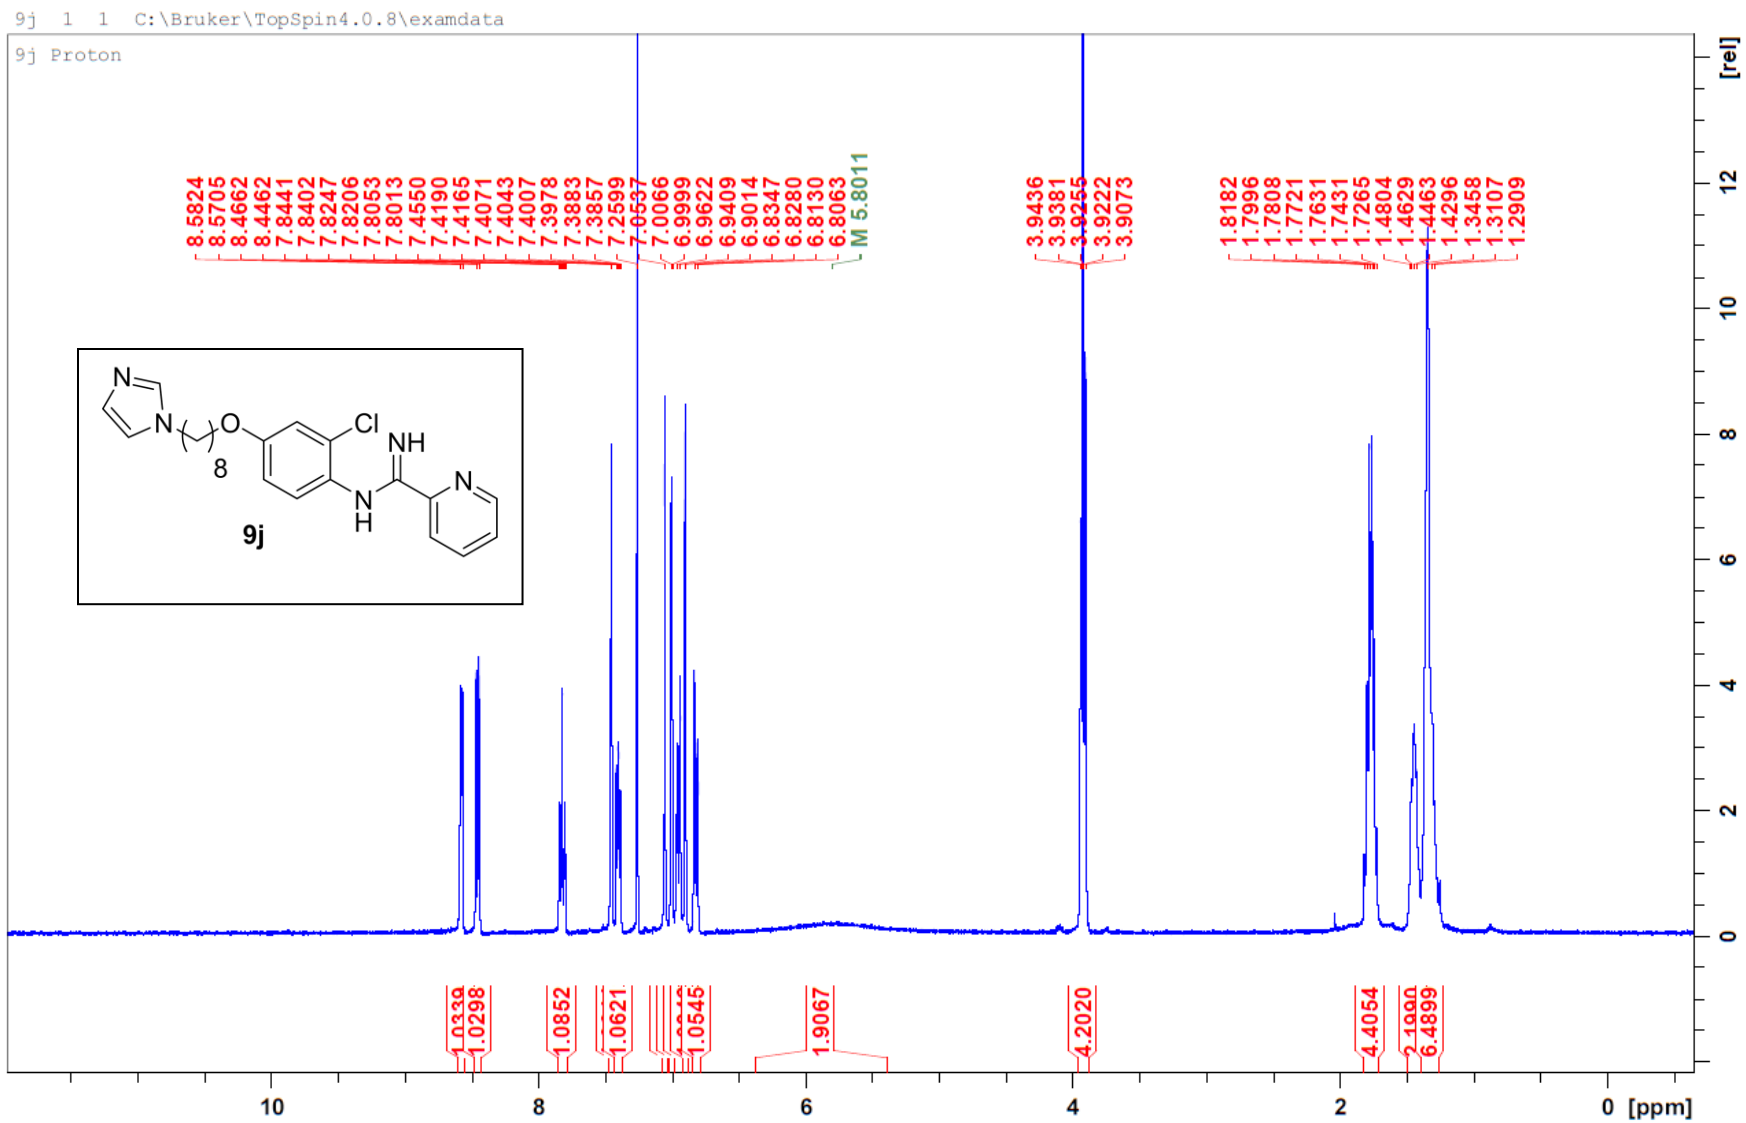

Figure S37.  $^1\text{H}$  NMR spectrum of compound **9j** (400 MHz,  $\text{CDCl}_3$ ).

9j 1 1 C:\Bruker\TopSpin4.0.8\examdata

9j Proton

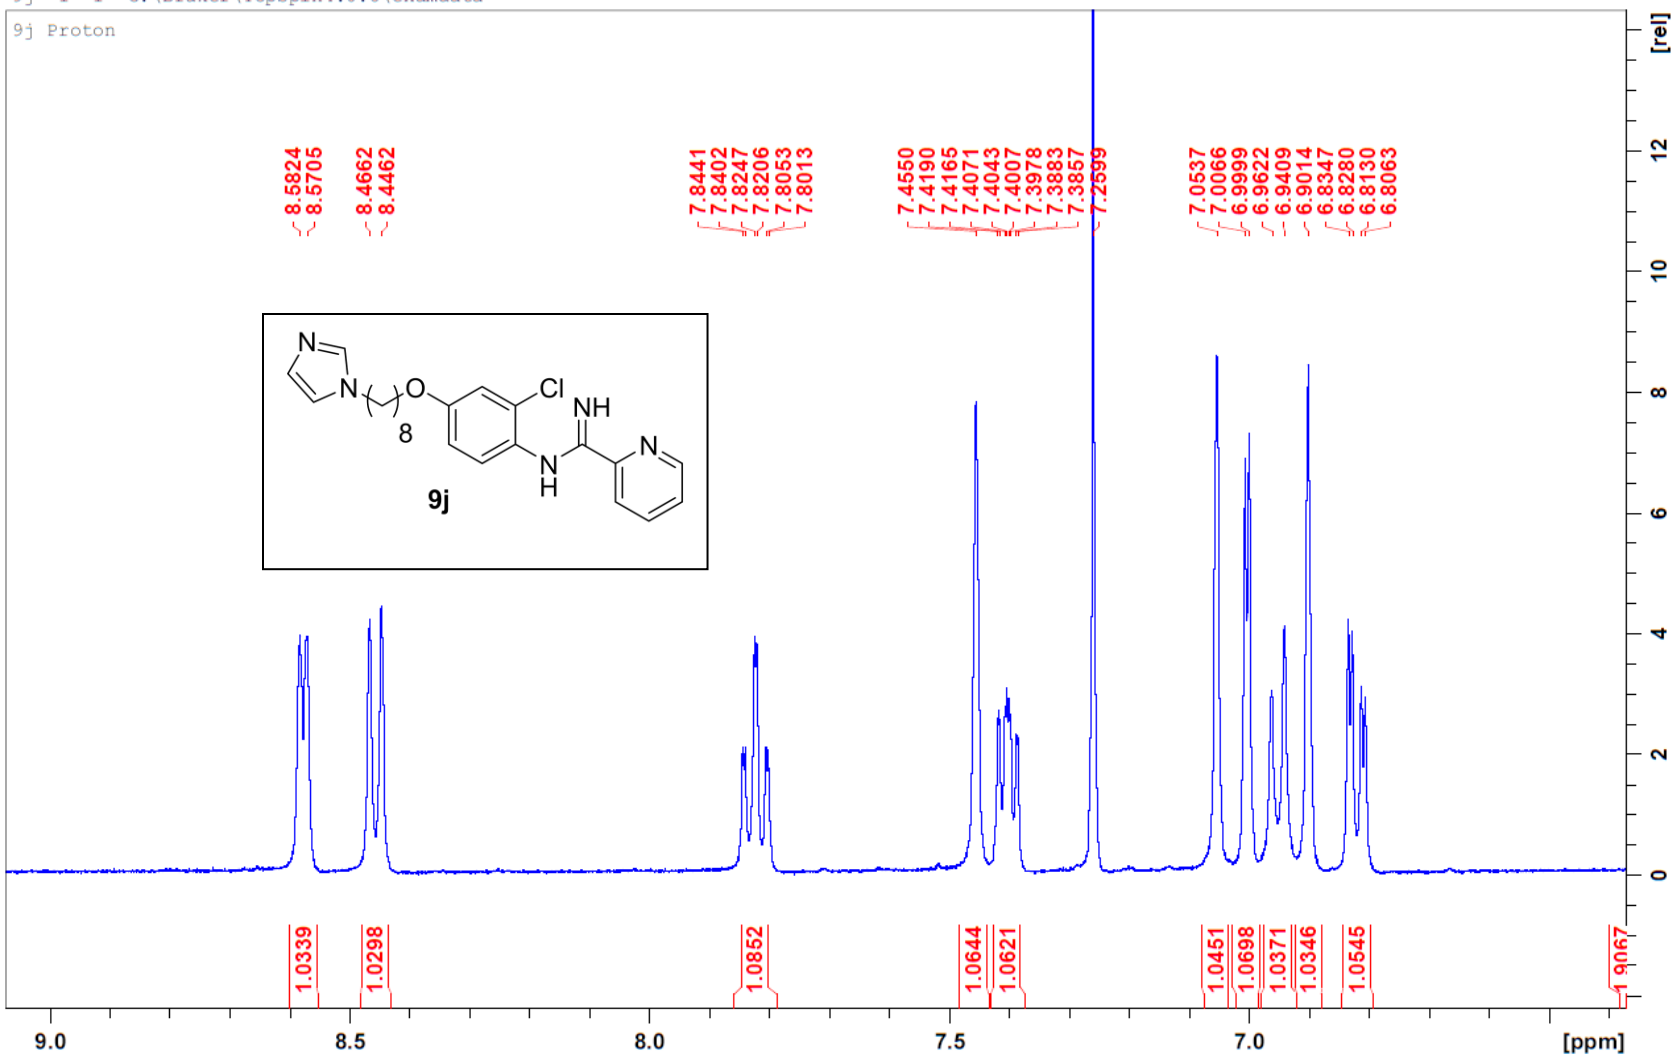

Figure S38. Expanded  $^1\text{H}$  NMR spectrum of compound **9j** (400 MHz,  $\text{CDCl}_3$ ).

9j 2 1 C:\Bruker\TopSpin4.0.8\examdata

9j Carbon

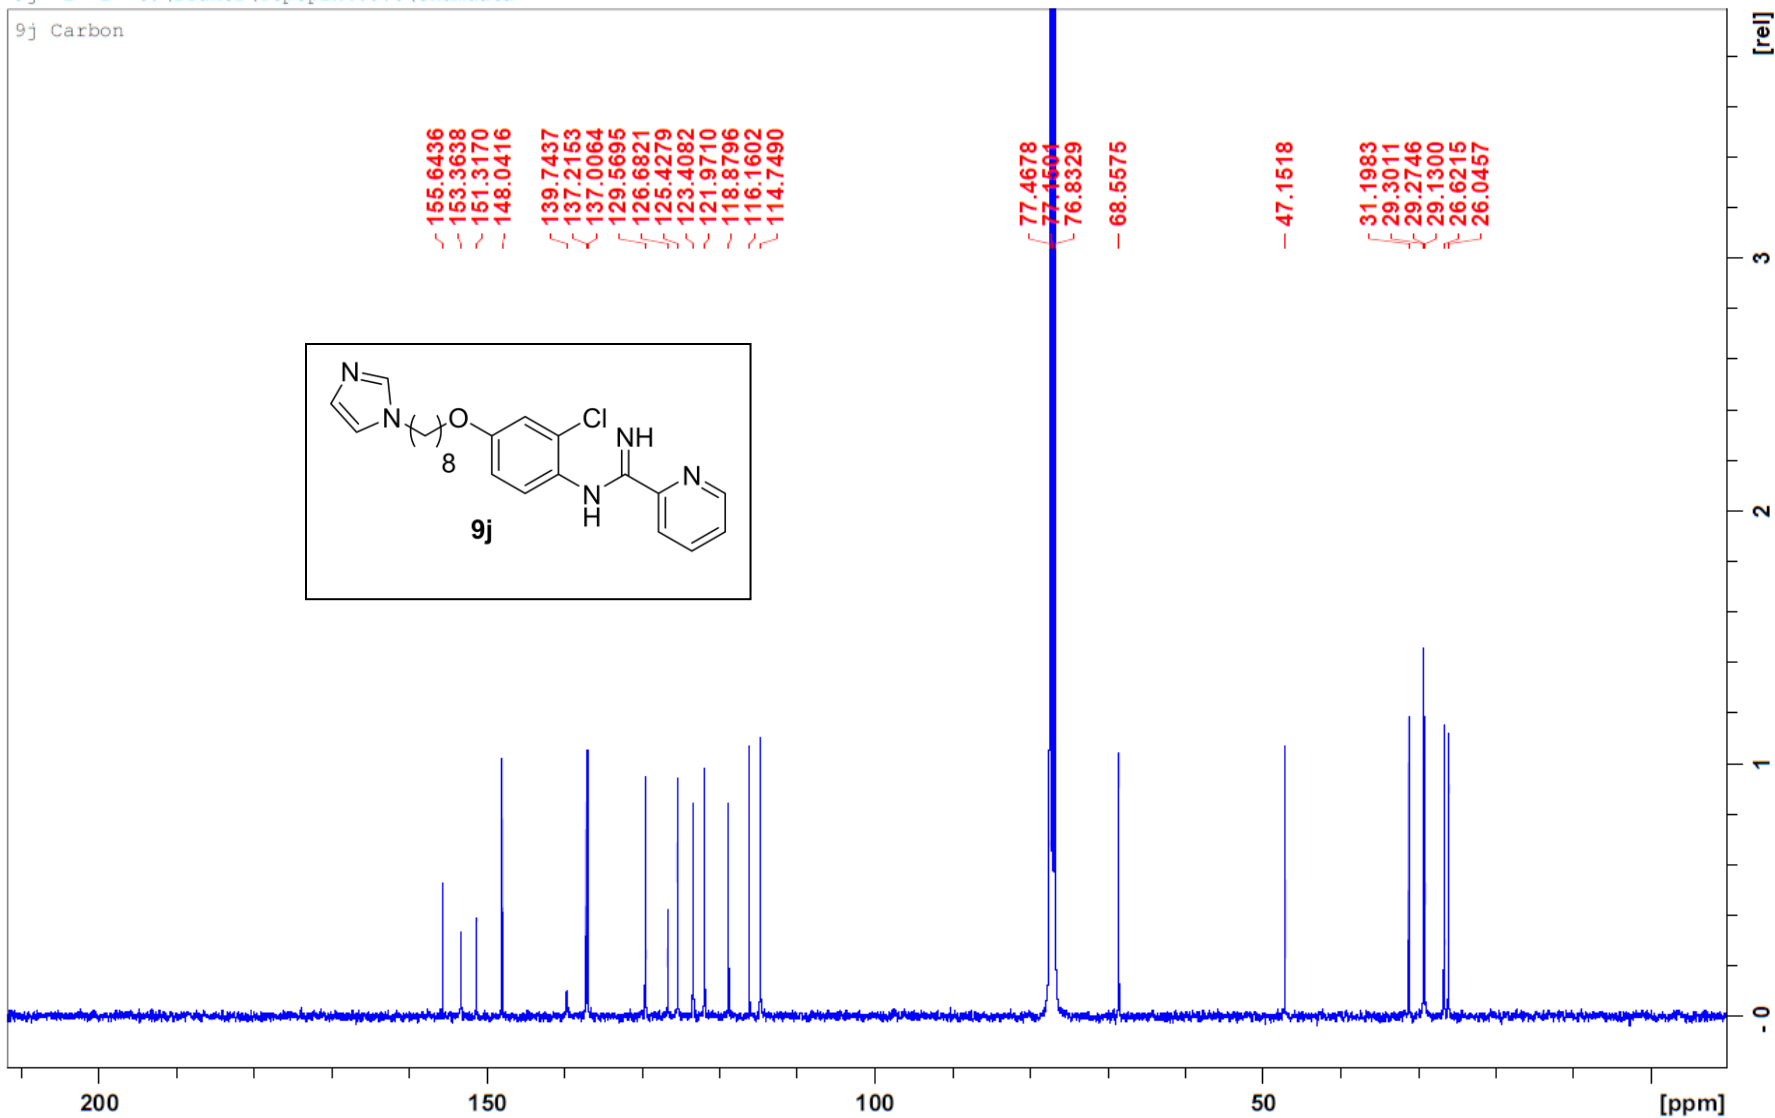

Figure S39.  $^{13}\text{C}$  NMR spectrum of compound 9j (100 MHz,  $\text{CDCl}_3$ ).



9j 2 1 C:\Bruker\TopSpin4.0.8\examdata

9j Carbon

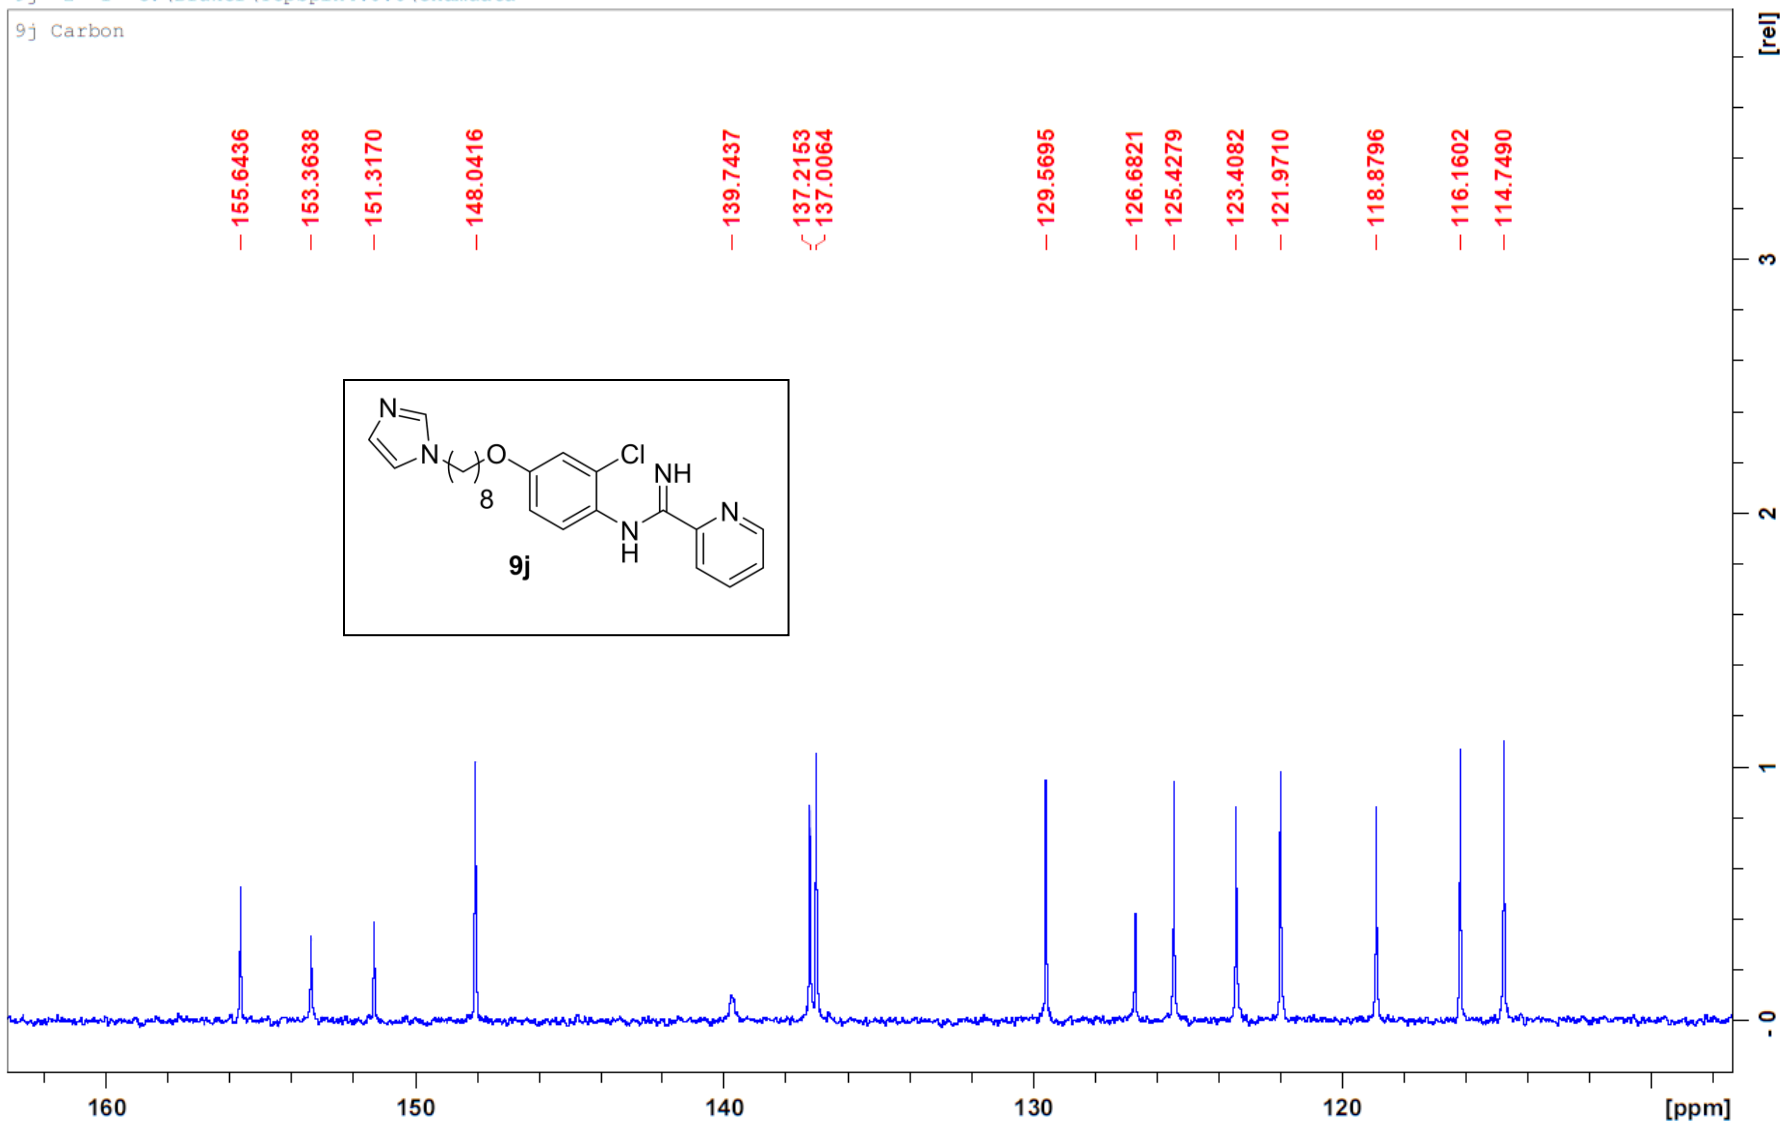

Figure S40. Expanded  $^{13}\text{C}$  NMR spectrum of compound **9j** (100 MHz,  $\text{CDCl}_3$ ).

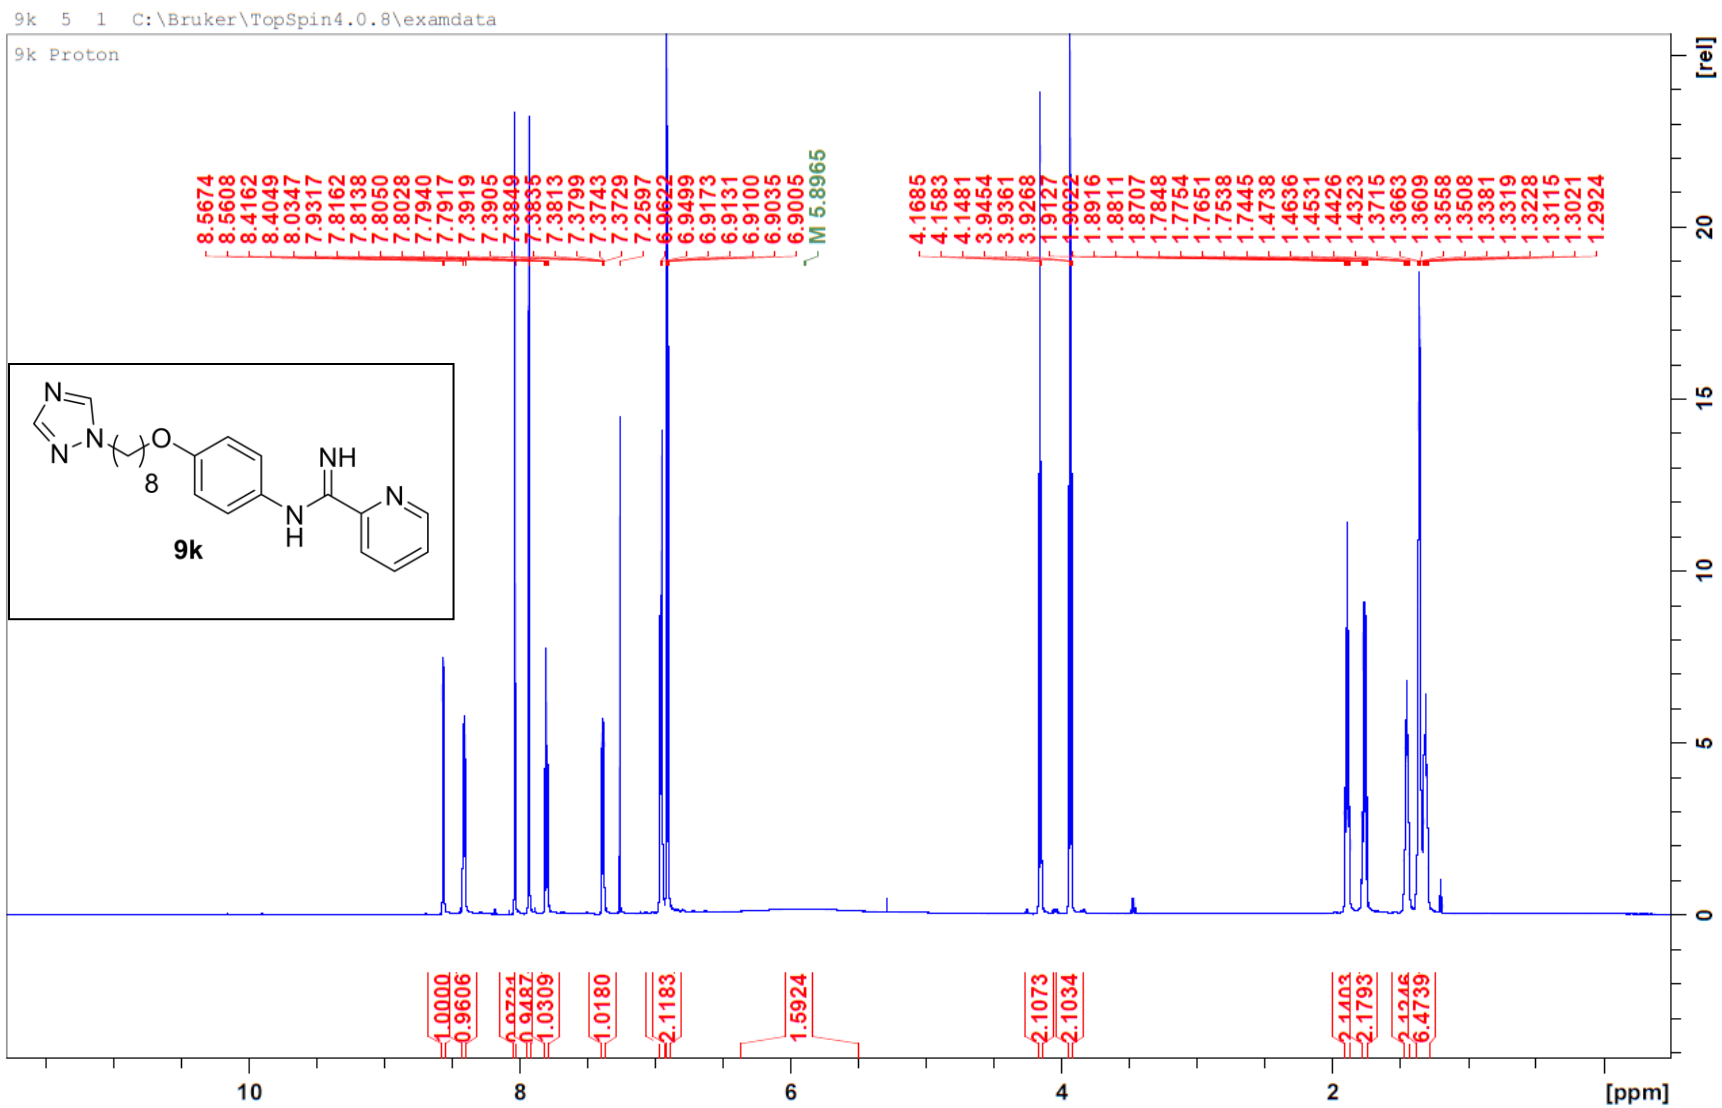

Figure S41. <sup>1</sup>H NMR spectrum of compound **9k** (700 MHz, CDCl<sub>3</sub>).

9k 5 1 C:\Bruker\TopSpin4.0.8\examdata

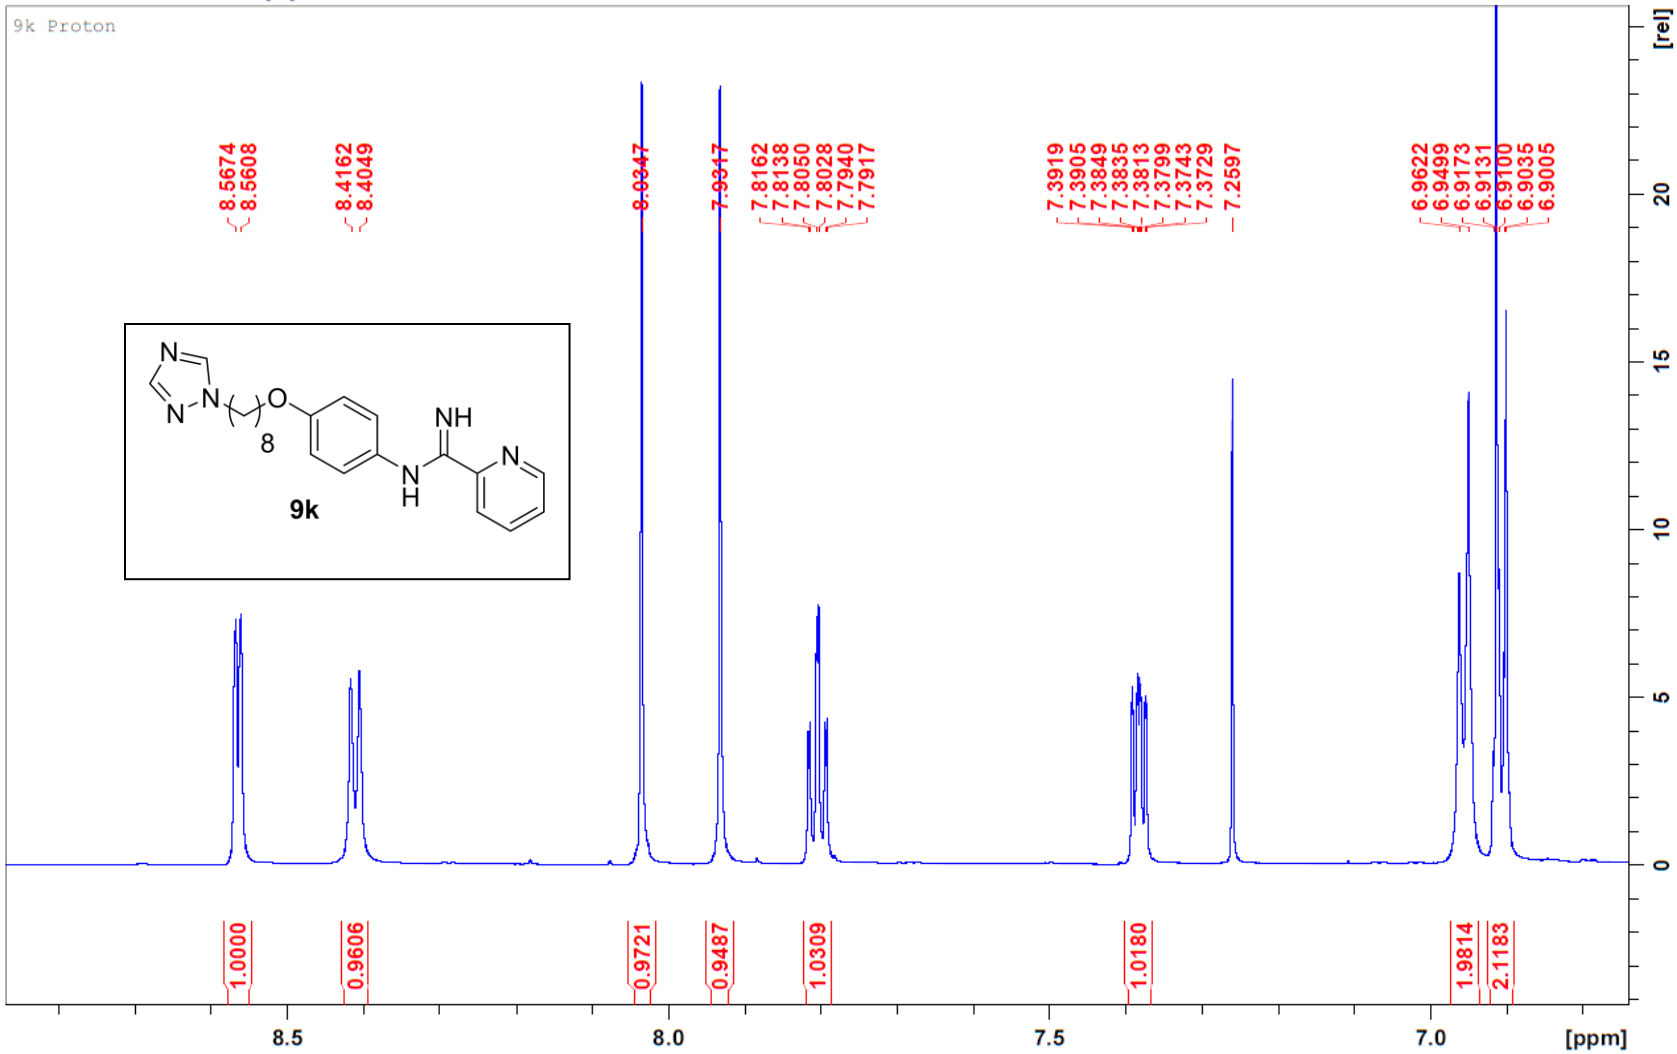

**Figure S42.** Expanded  $^1\text{H}$  NMR spectrum of compound **9k** (700 MHz,  $\text{CDCl}_3$ ).

9k 6 1 C:\Bruker\TopSpin4.0.8\examdata

9k Carbon

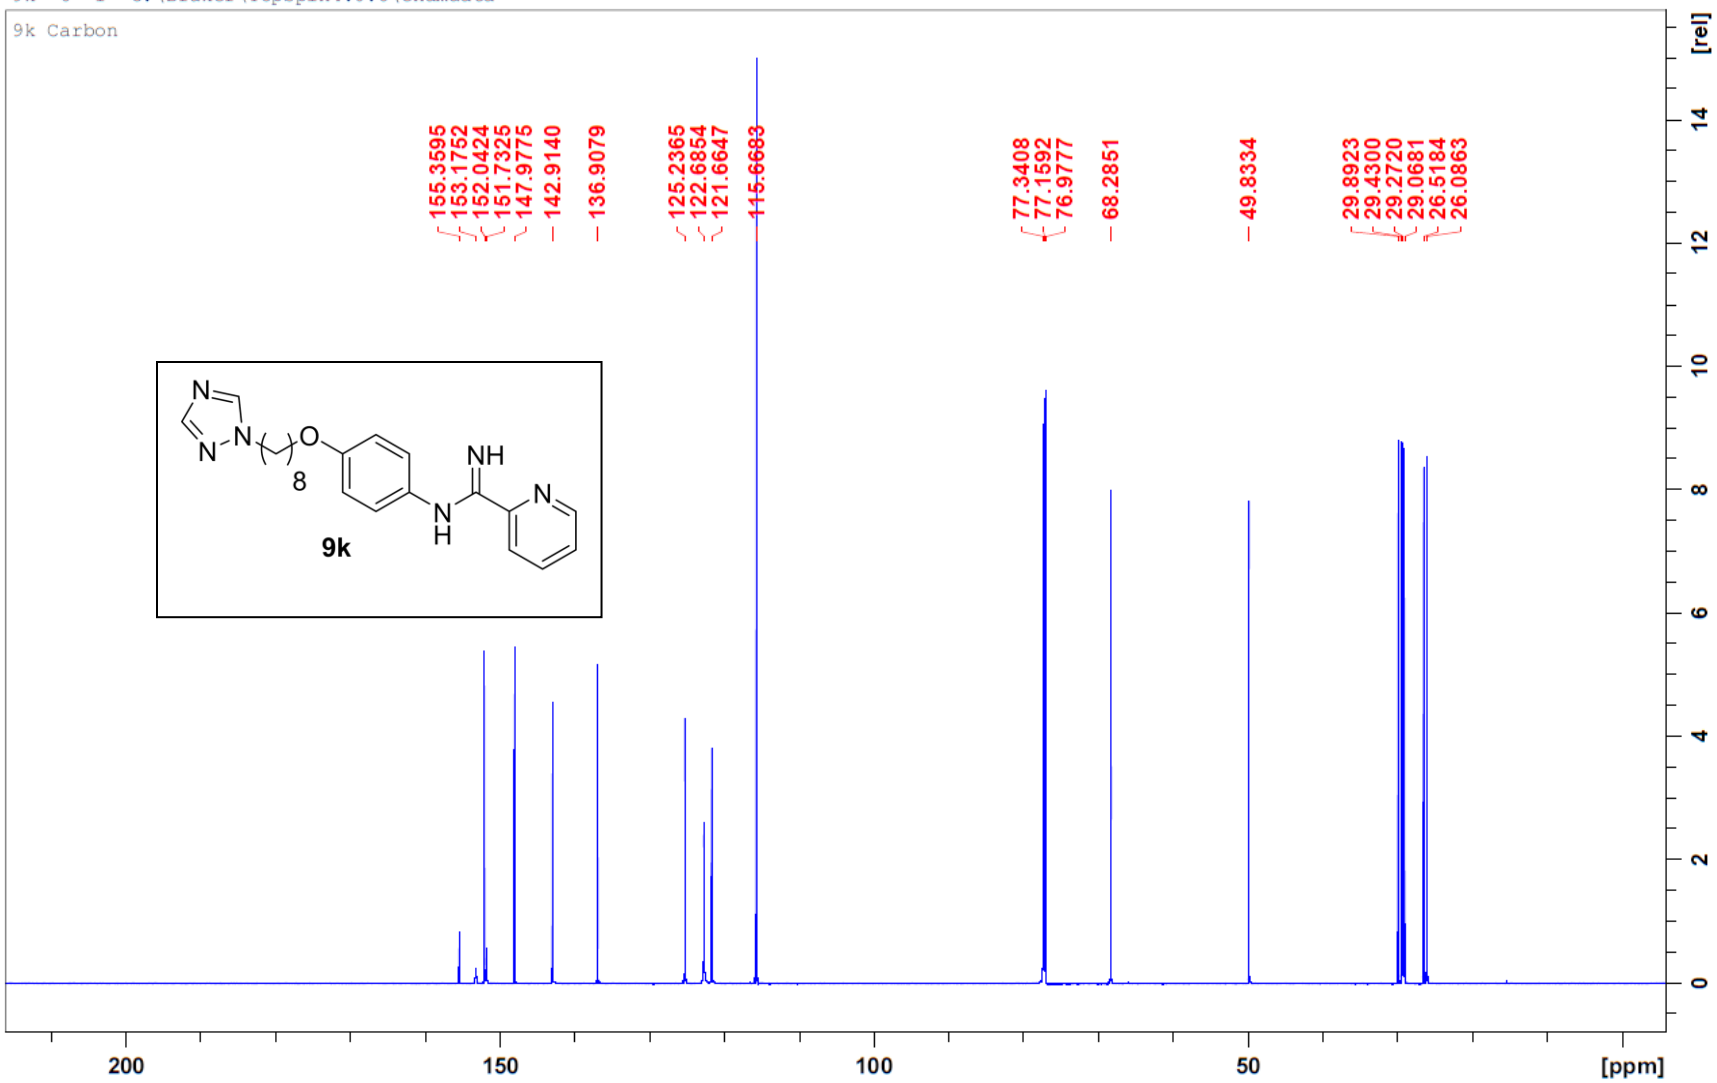

Figure S43.  $^{13}\text{C}$  NMR spectrum of compound 9k (176 MHz,  $\text{CDCl}_3$ ).

9k 6 1 C:\Bruker\TopSpin4.0.8\examdata

9k Carbon

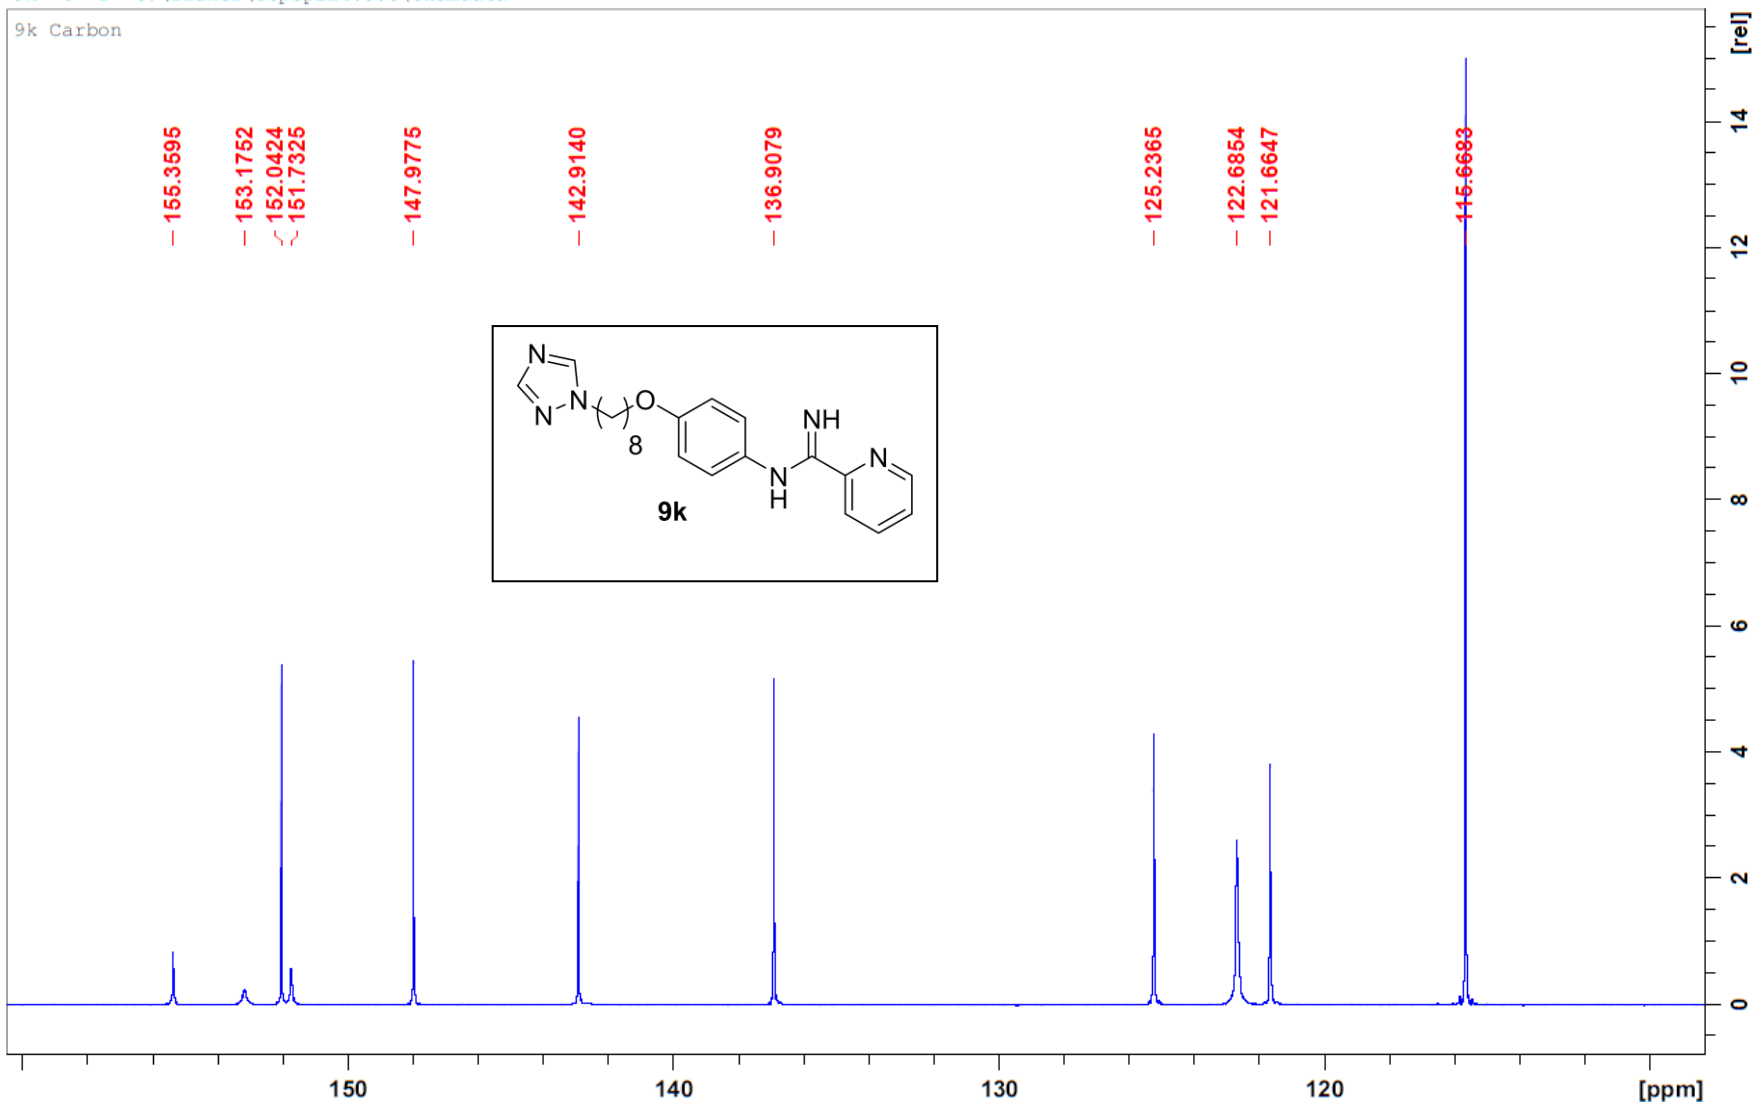

**Figure S44.** Expanded  $^{13}\text{C}$  NMR spectrum of compound **9k** (176 MHz,  $\text{CDCl}_3$ ).

91 2 1 C:\Bruker\TopSpin4.0.8\examdata

91 Proton

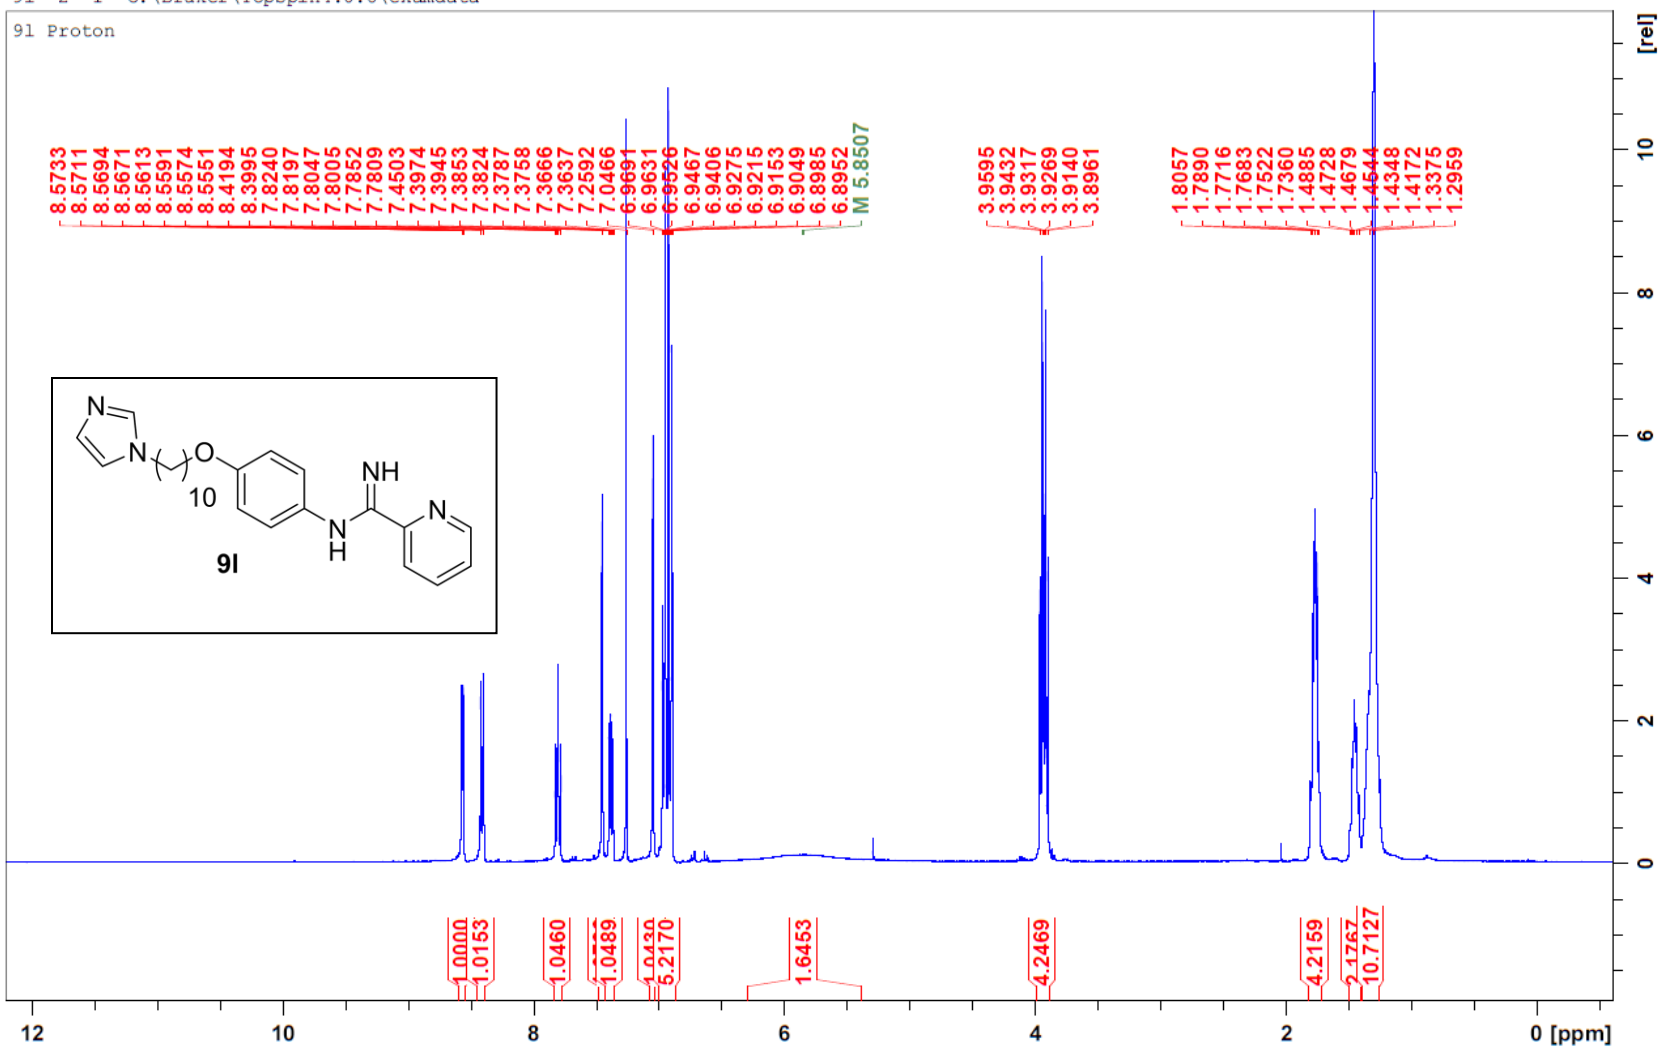

Figure S45. <sup>1</sup>H NMR spectrum of compound 91 (400 MHz, CDCl<sub>3</sub>).

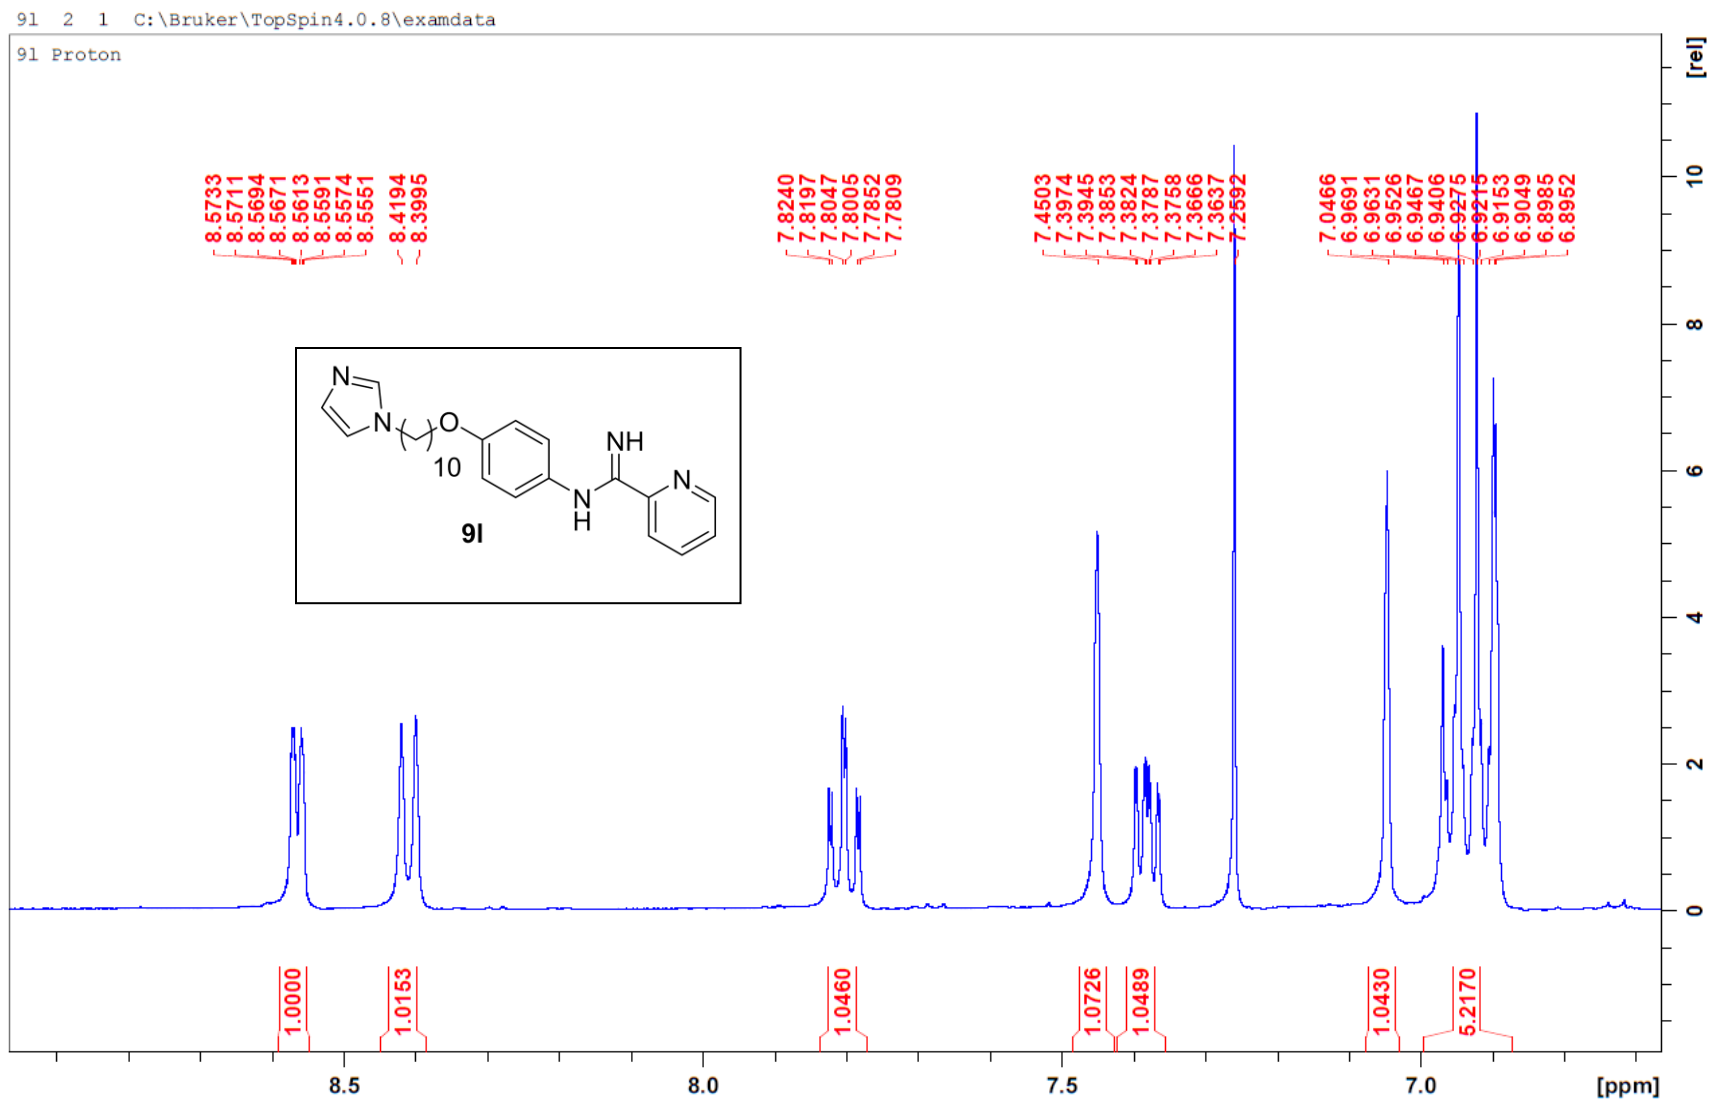

**Figure S46.** Expanded  $^1\text{H}$  NMR spectrum of compound **9I** (400 MHz,  $\text{CDCl}_3$ ).

91 3 1 C:\Bruker\TopSpin4.0.8\examdata

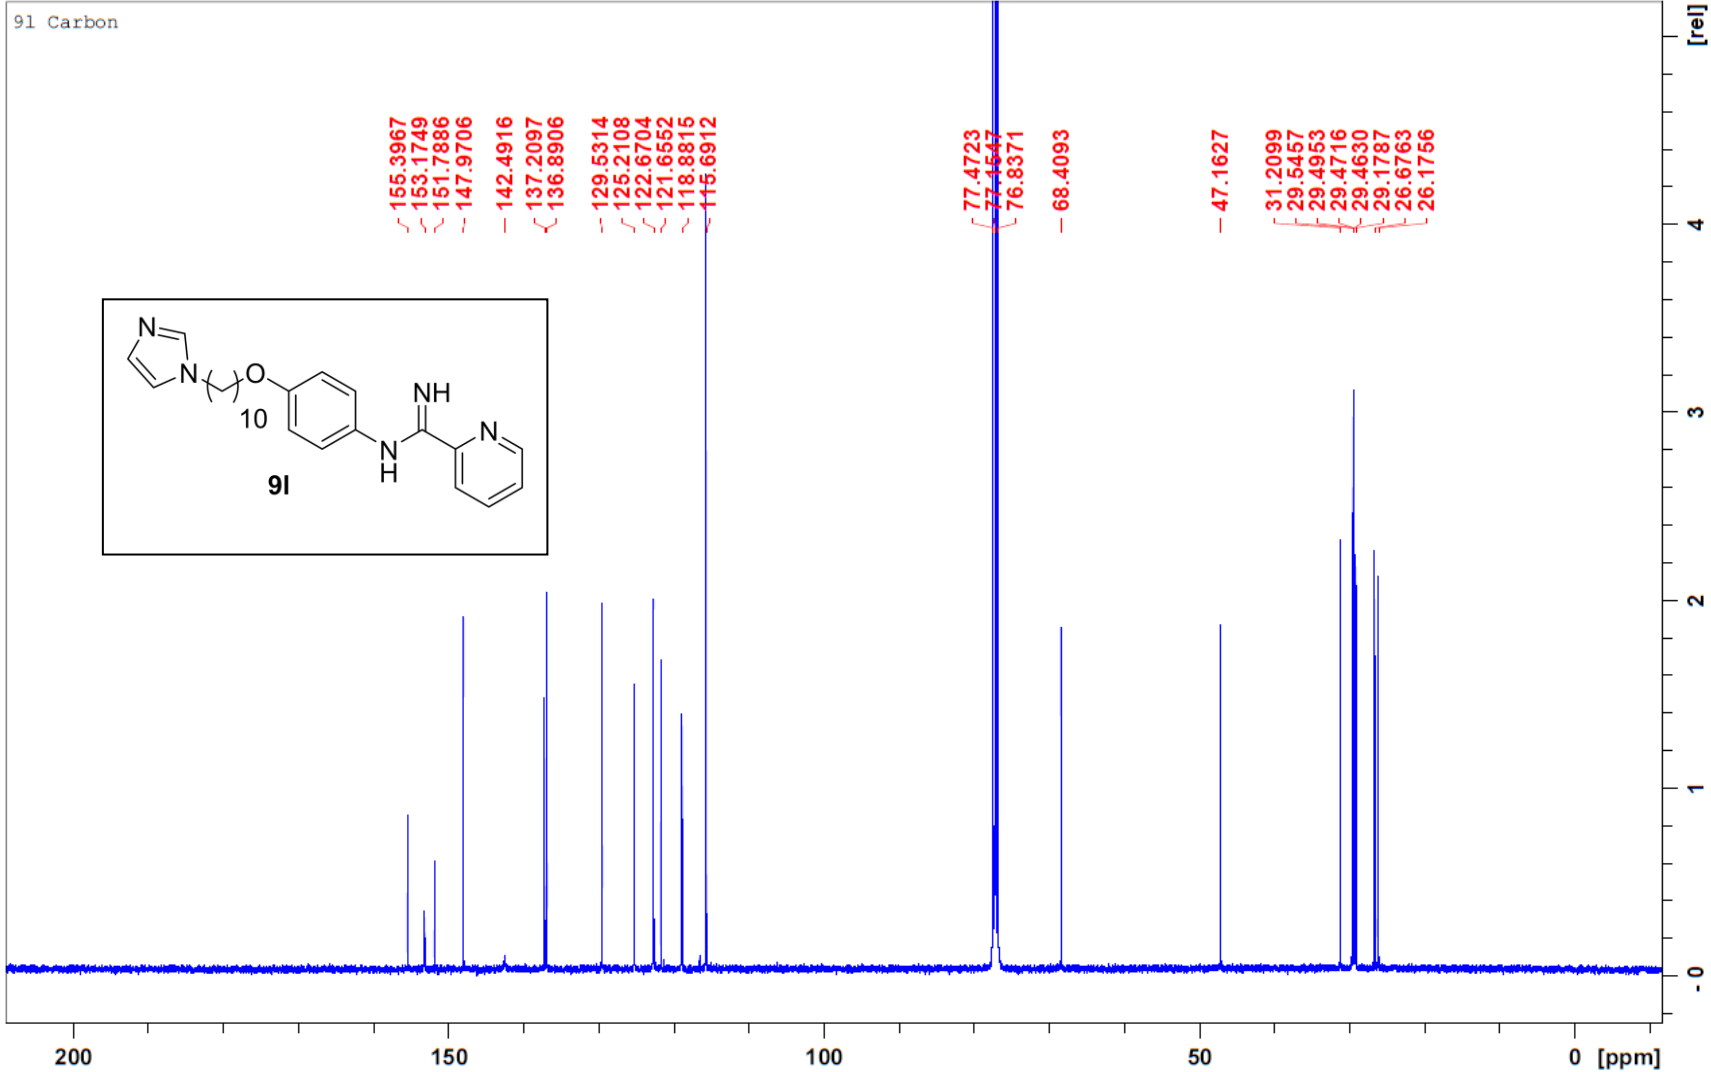

Figure S47. <sup>13</sup>C NMR spectrum of compound 9I (100 MHz, CDCl<sub>3</sub>).



91 3 1 C:\Bruker\TopSpin4.0.8\examdata

91 Carbon

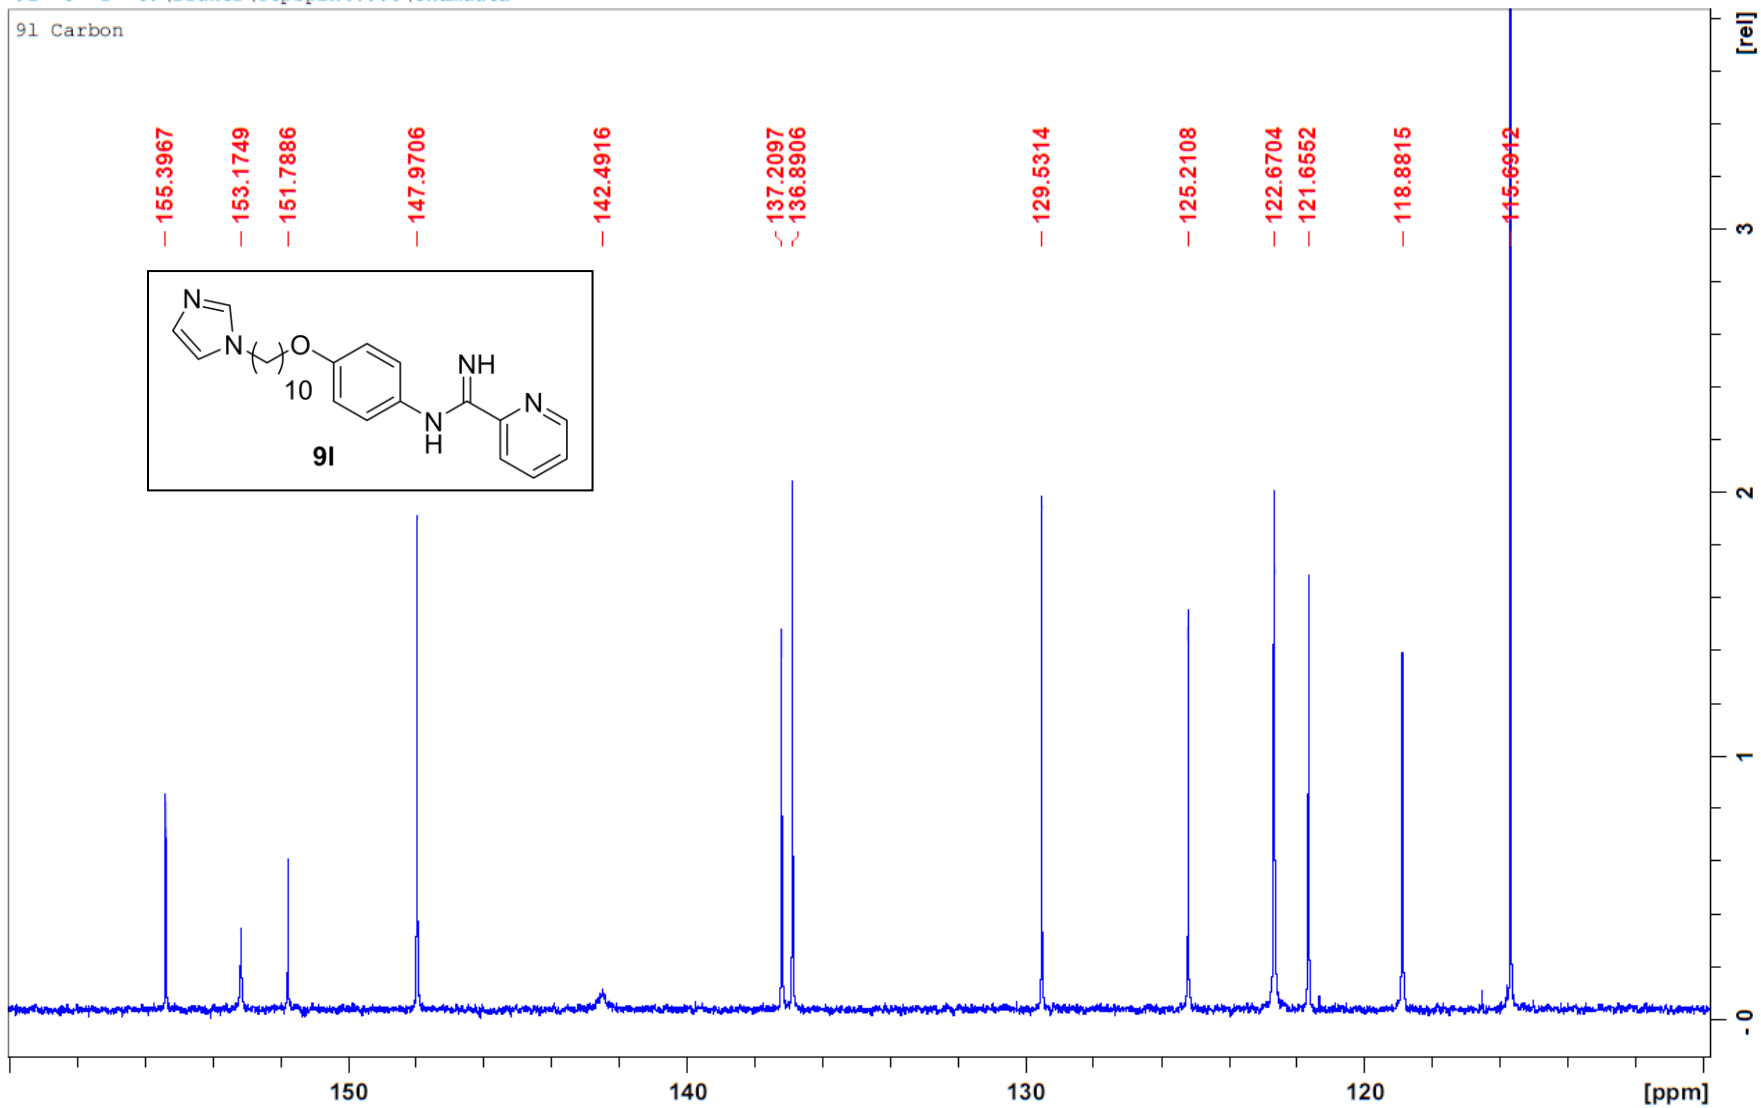

Figure S48. Expanded  $^{13}\text{C}$  NMR spectrum of compound **9I** (100 MHz,  $\text{CDCl}_3$ ).

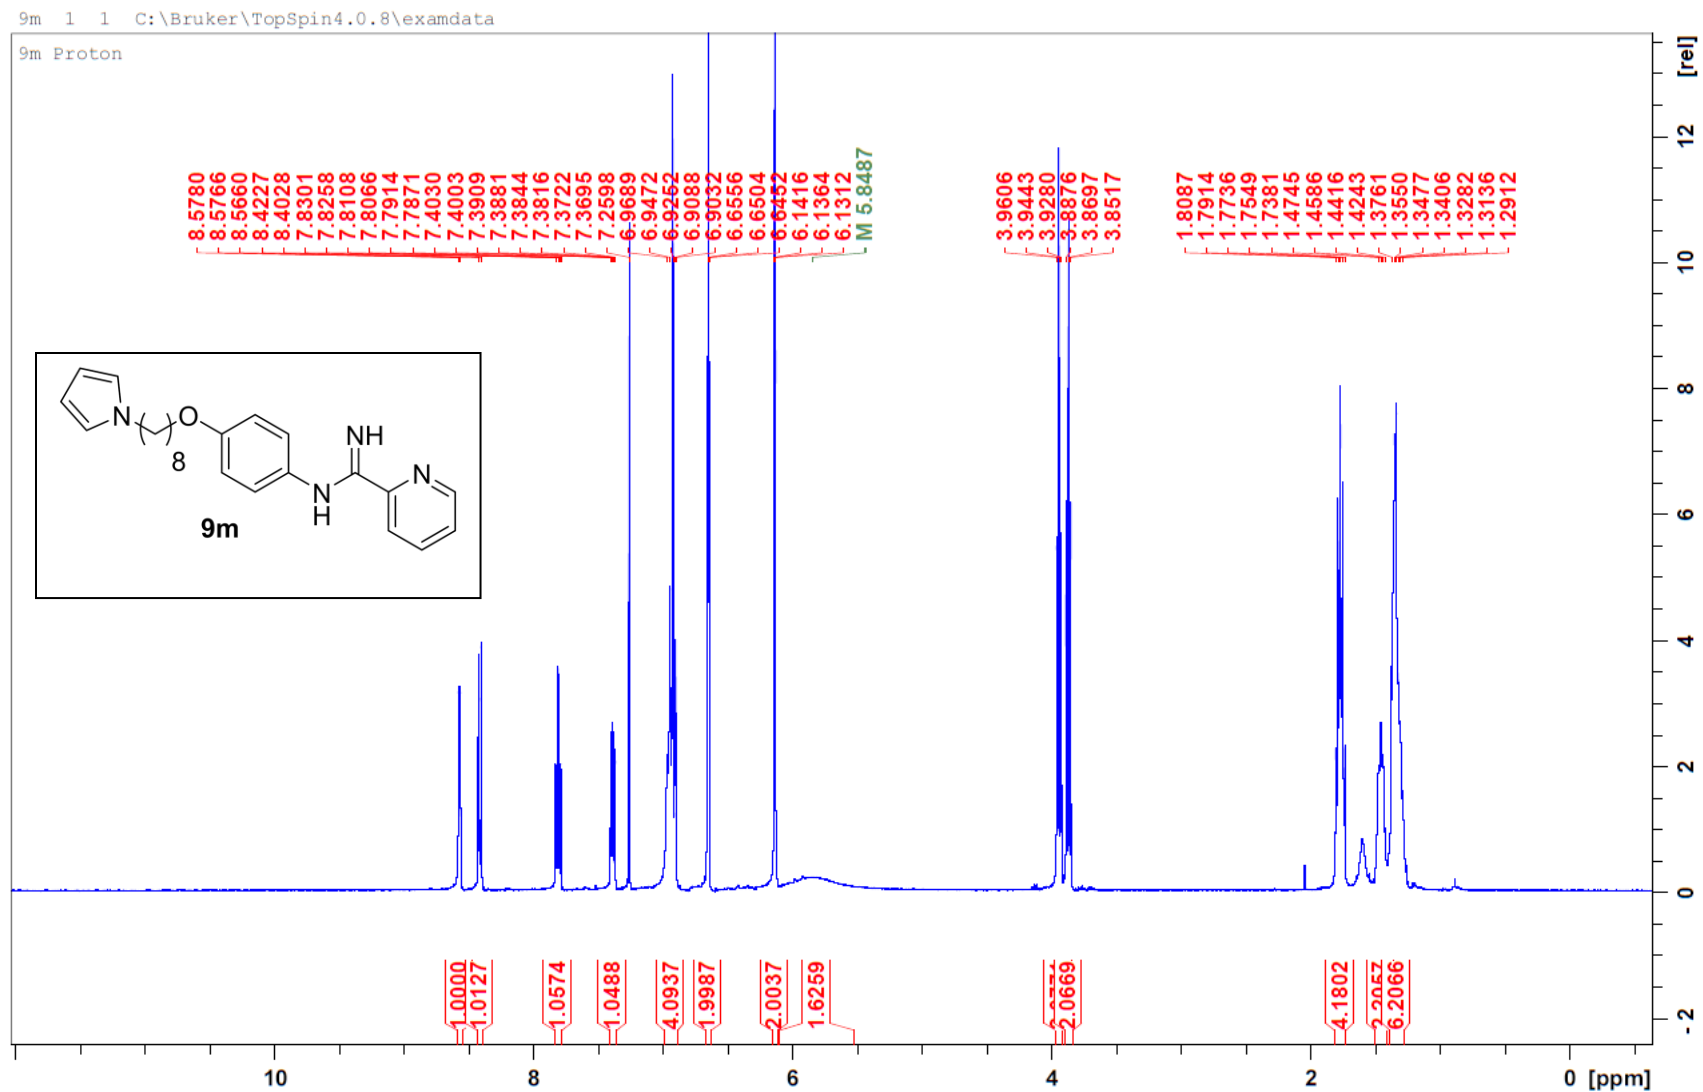

Figure S49. <sup>1</sup>H NMR spectrum of compound **9m** (400 MHz, CDCl<sub>3</sub>).

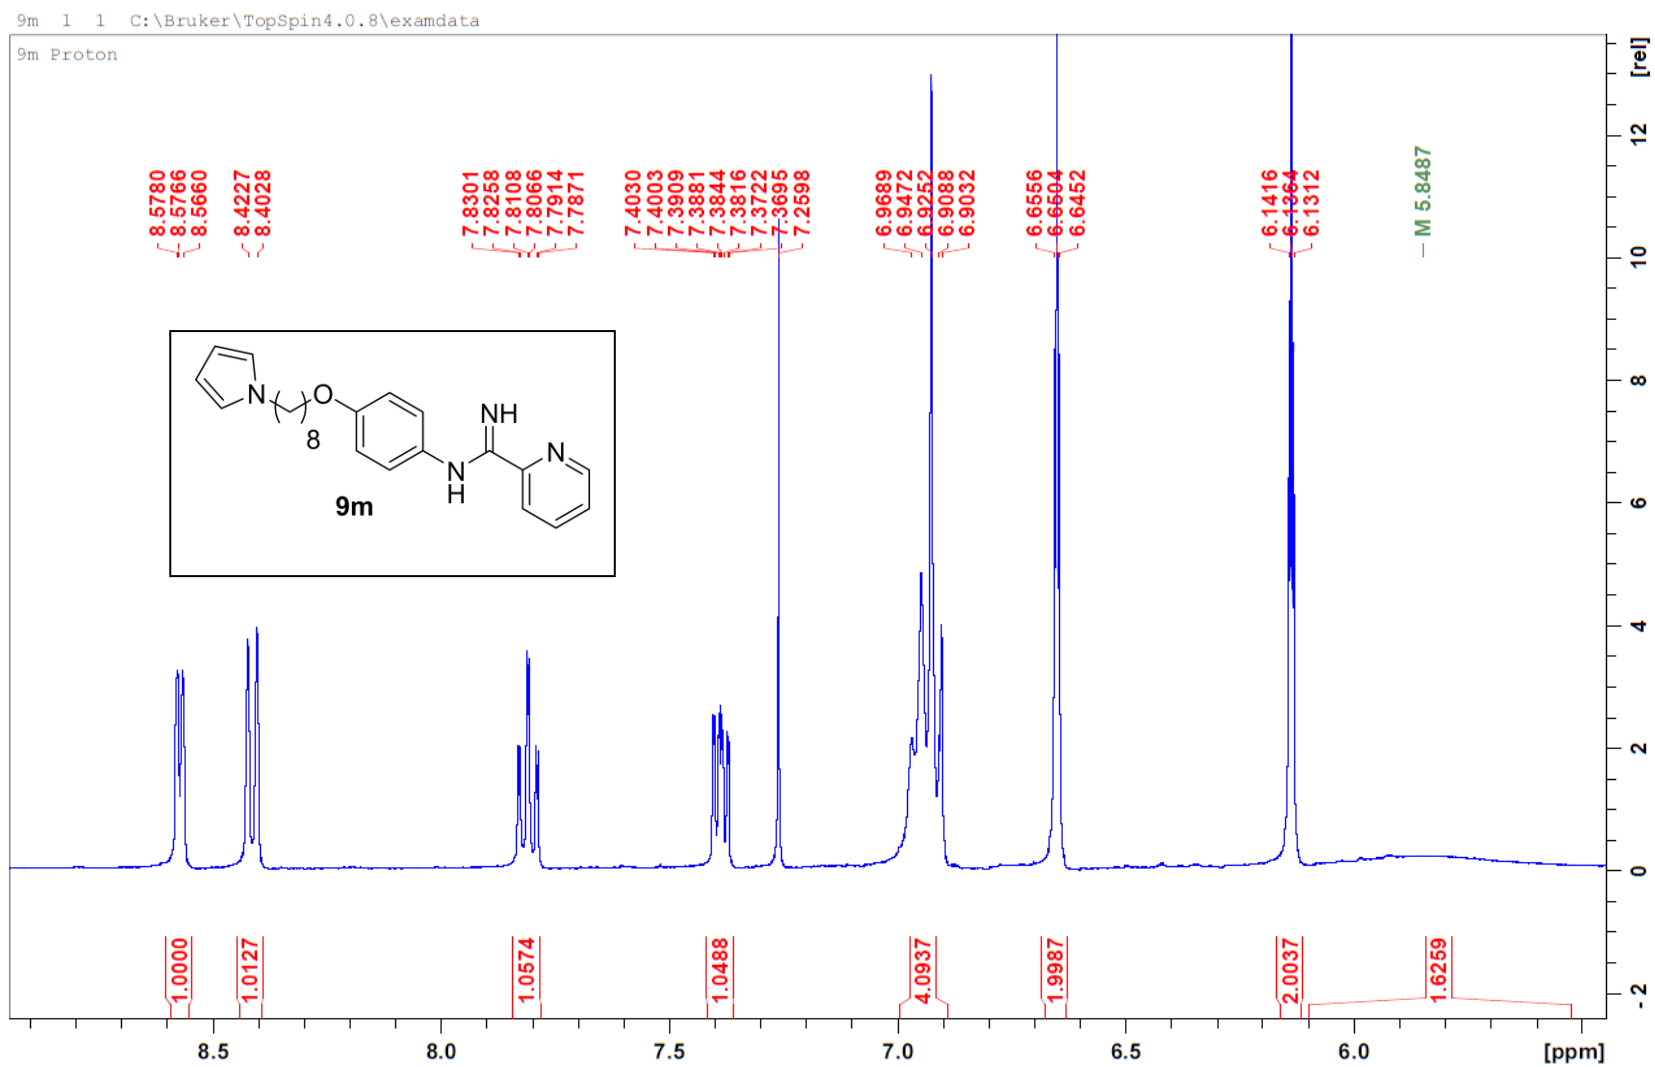

**Figure S50.** Expanded  $^1\text{H}$  NMR spectrum of compound **9m** (400 MHz,  $\text{CDCl}_3$ ).

9m 2 1 C:\Bruker\TopSpin4.0.8\examdata

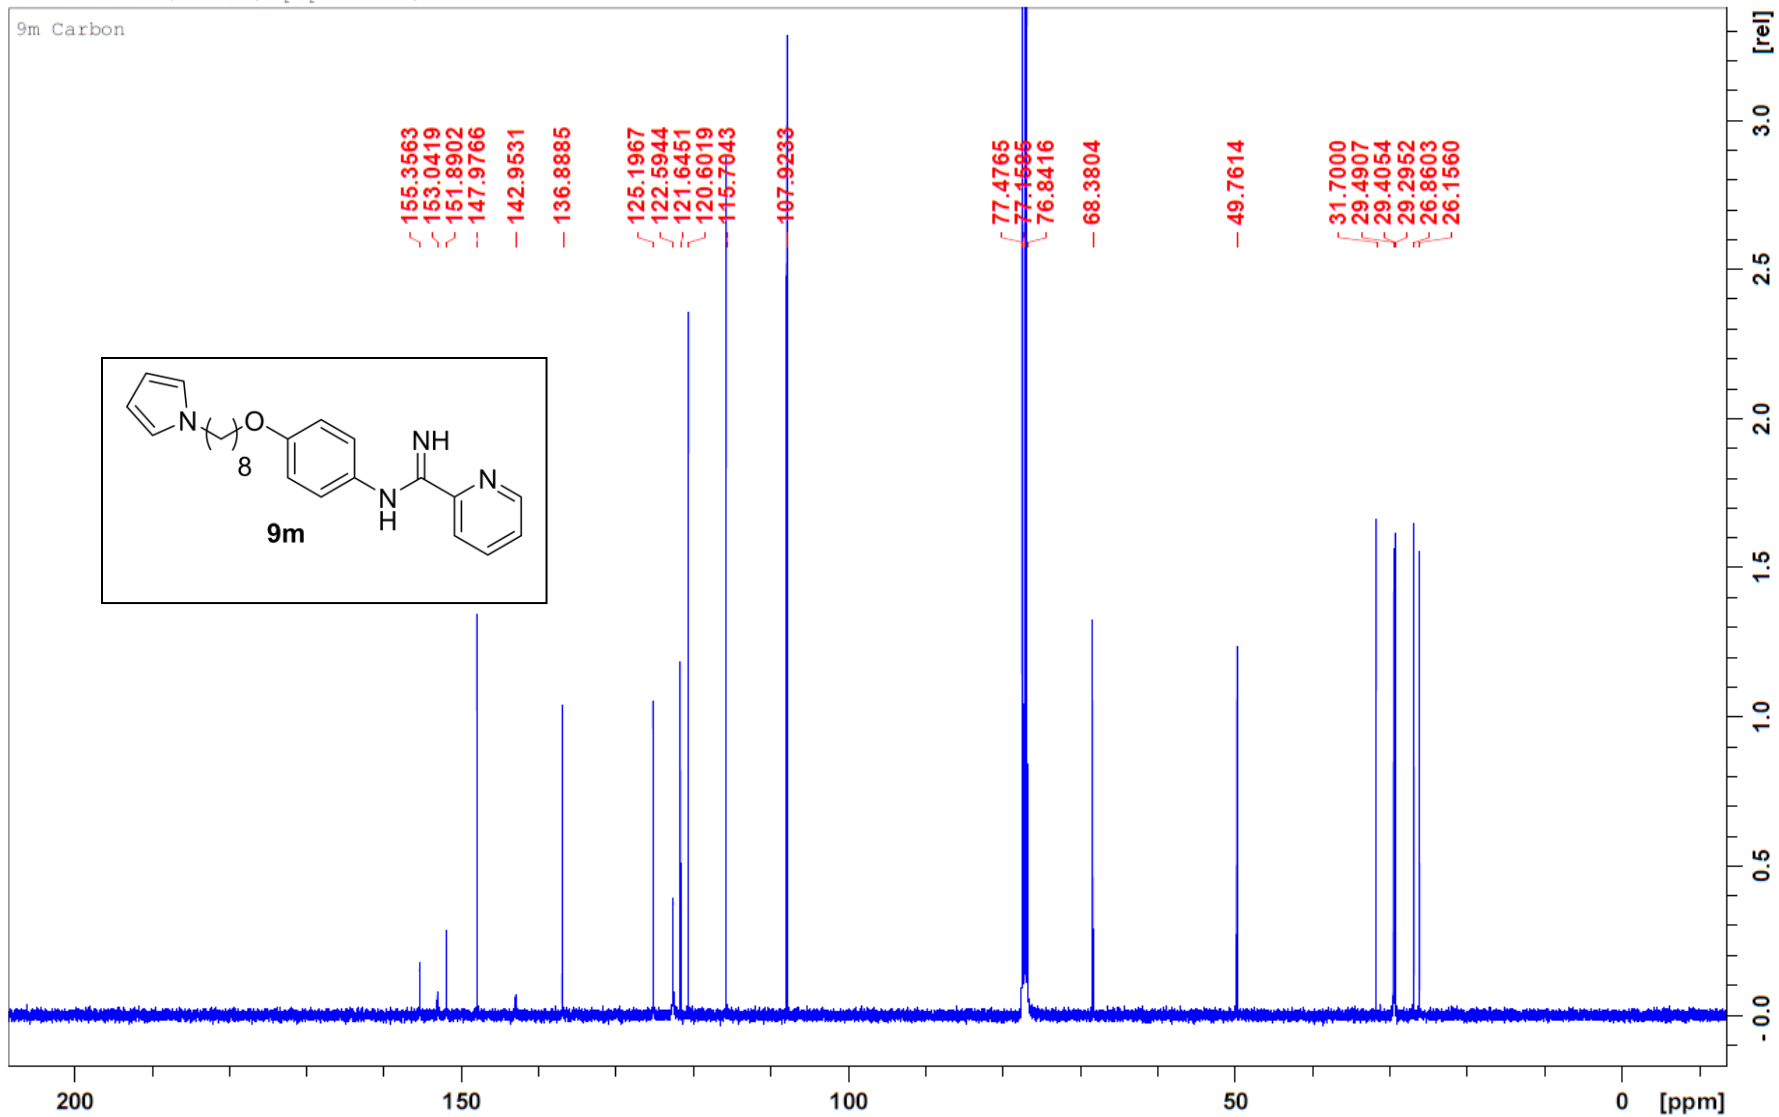

Figure S51.  $^{13}\text{C}$  NMR spectrum of compound **9m** (100 MHz,  $\text{CDCl}_3$ ).

9m 2 1 C:\Bruker\TopSpin4.0.8\examdata

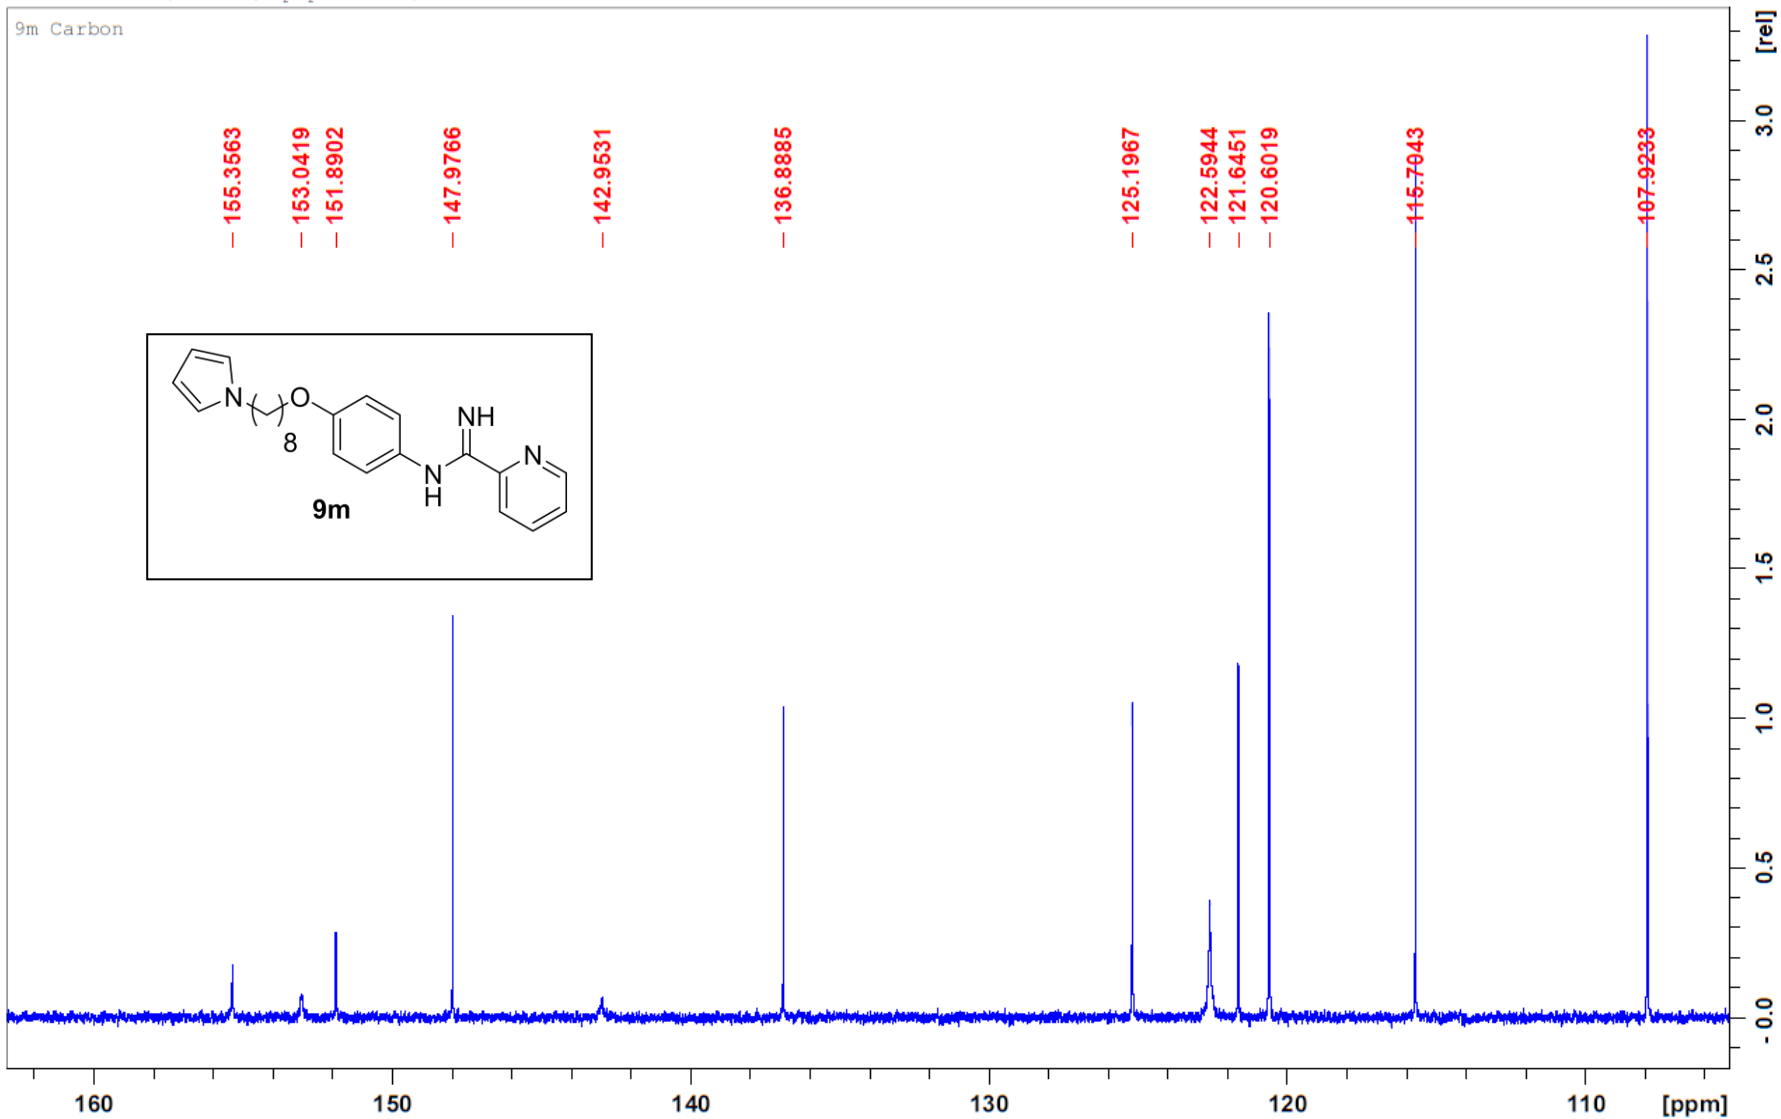

Figure S52. Expanded  $^{13}\text{C}$  NMR spectrum of compound **9m** (100 MHz,  $\text{CDCl}_3$ ).

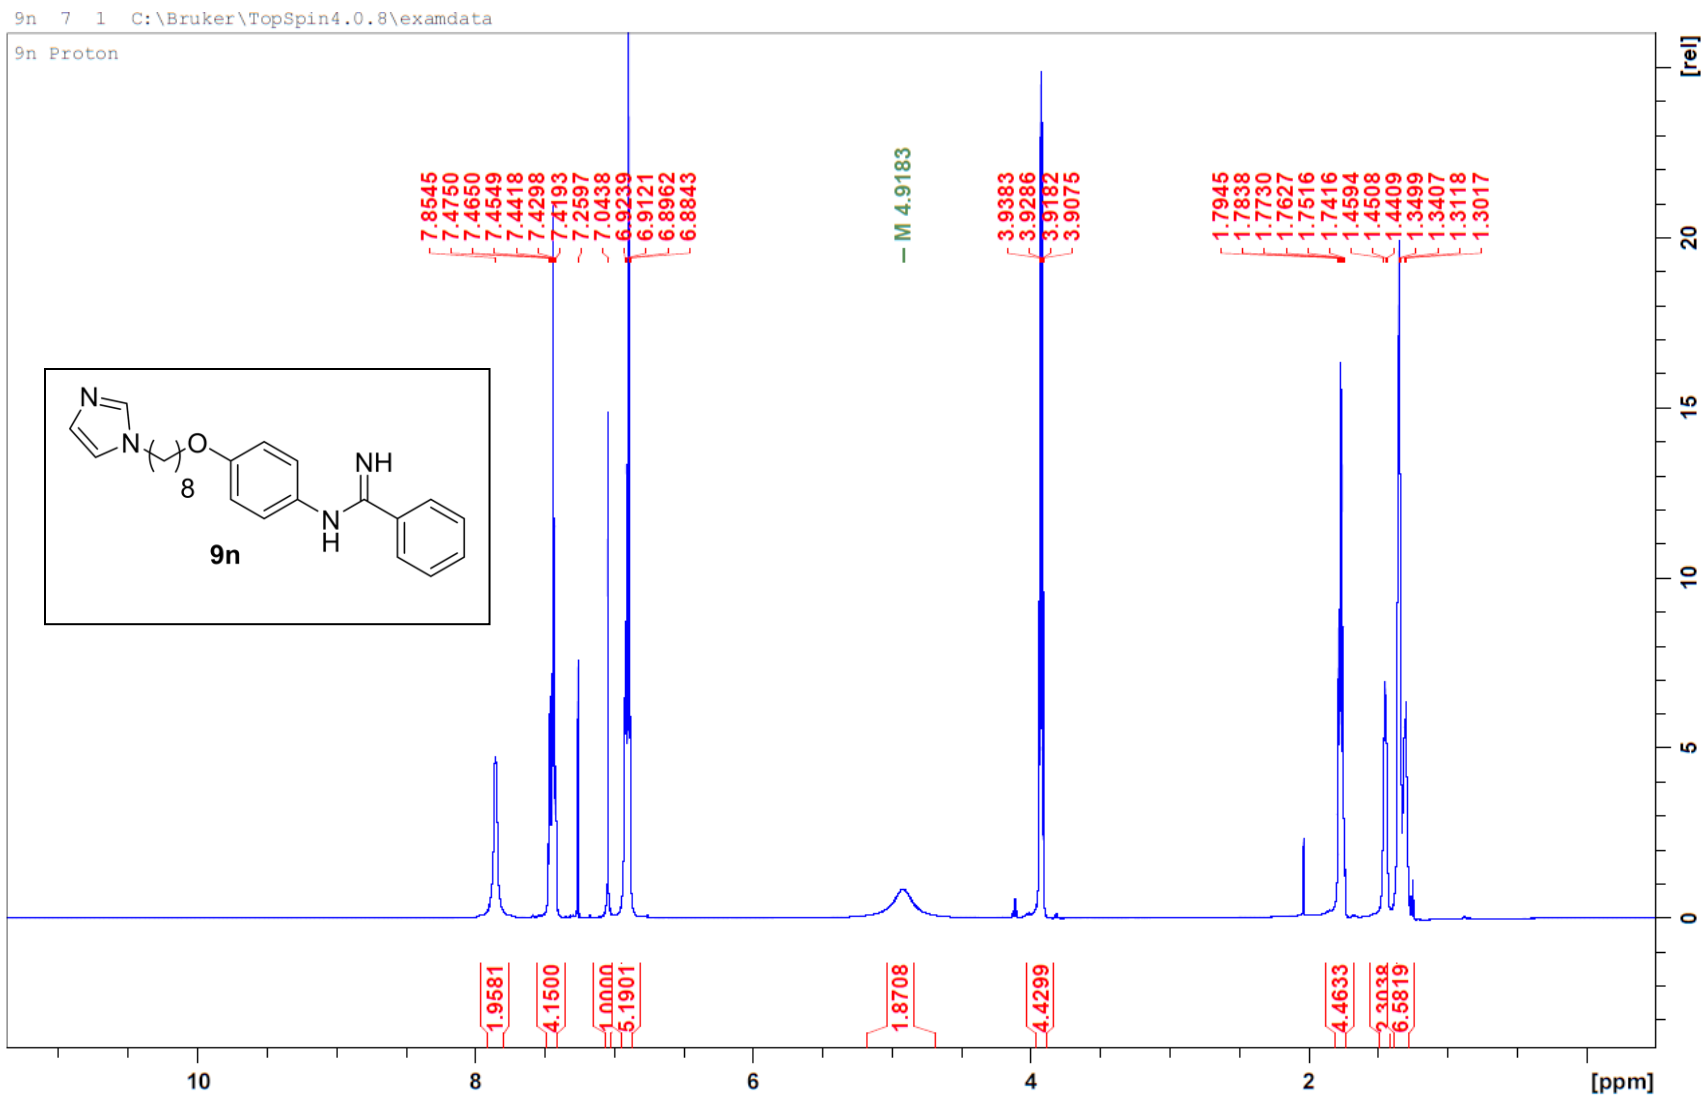

**Figure S53.**  $^1\text{H}$  NMR spectrum of compound **9n** (700 MHz,  $\text{CDCl}_3$ ).

9n 7 1 C:\Bruker\TopSpin4.0.8\examdata

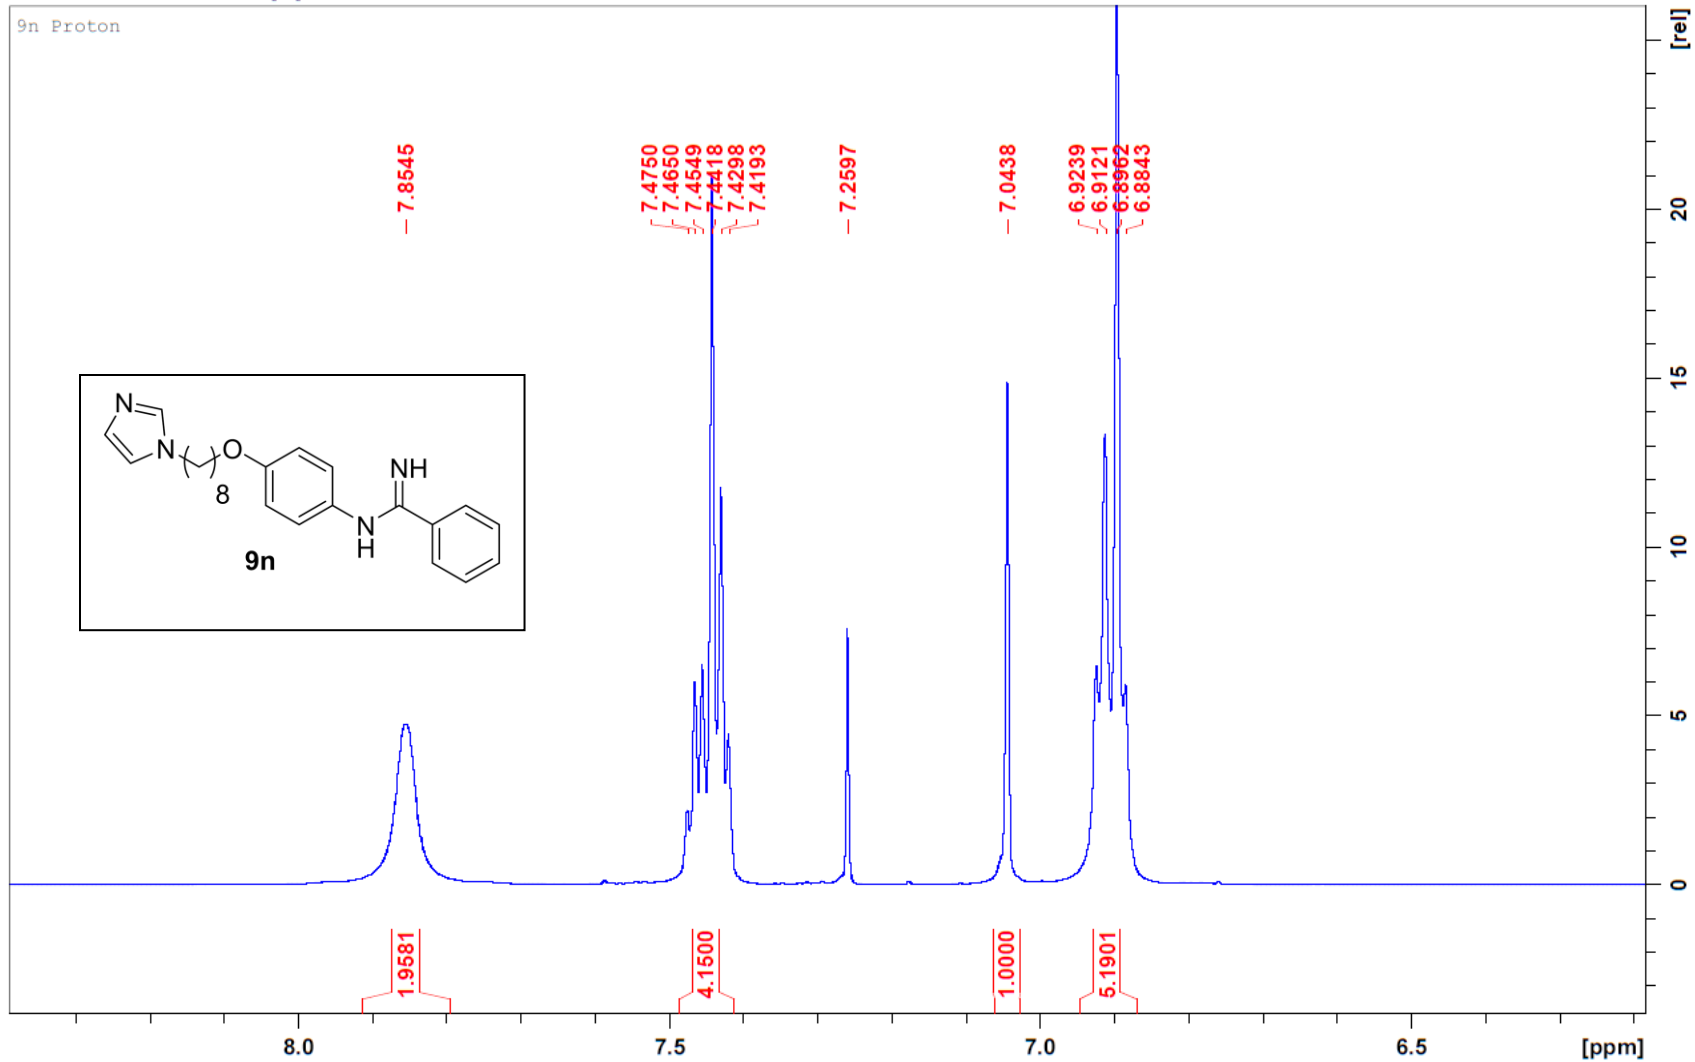

**Figure S54.** Expanded  $^1\text{H}$  NMR spectrum of compound **9n** (700 MHz,  $\text{CDCl}_3$ ).





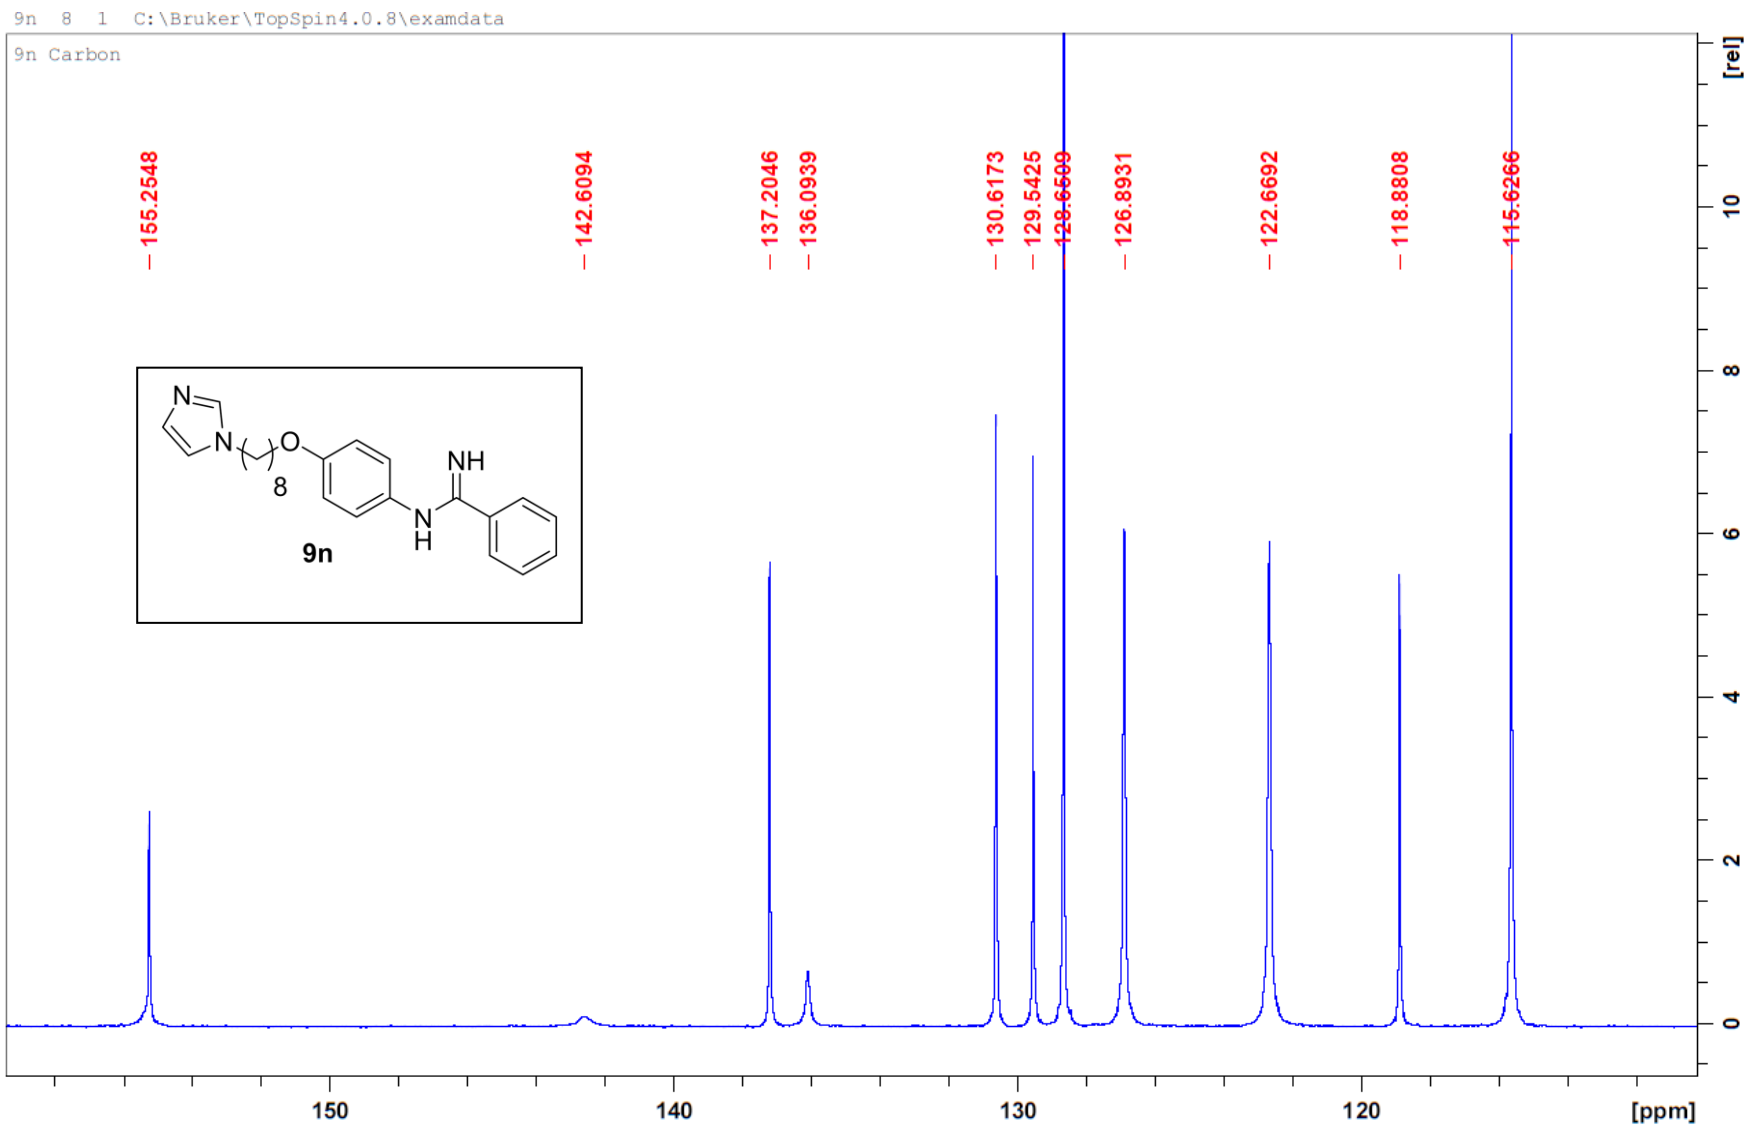

**Figure S56.** Expanded  $^{13}\text{C}$  NMR spectrum of compound **9n** (176 MHz,  $\text{CDCl}_3$ ).

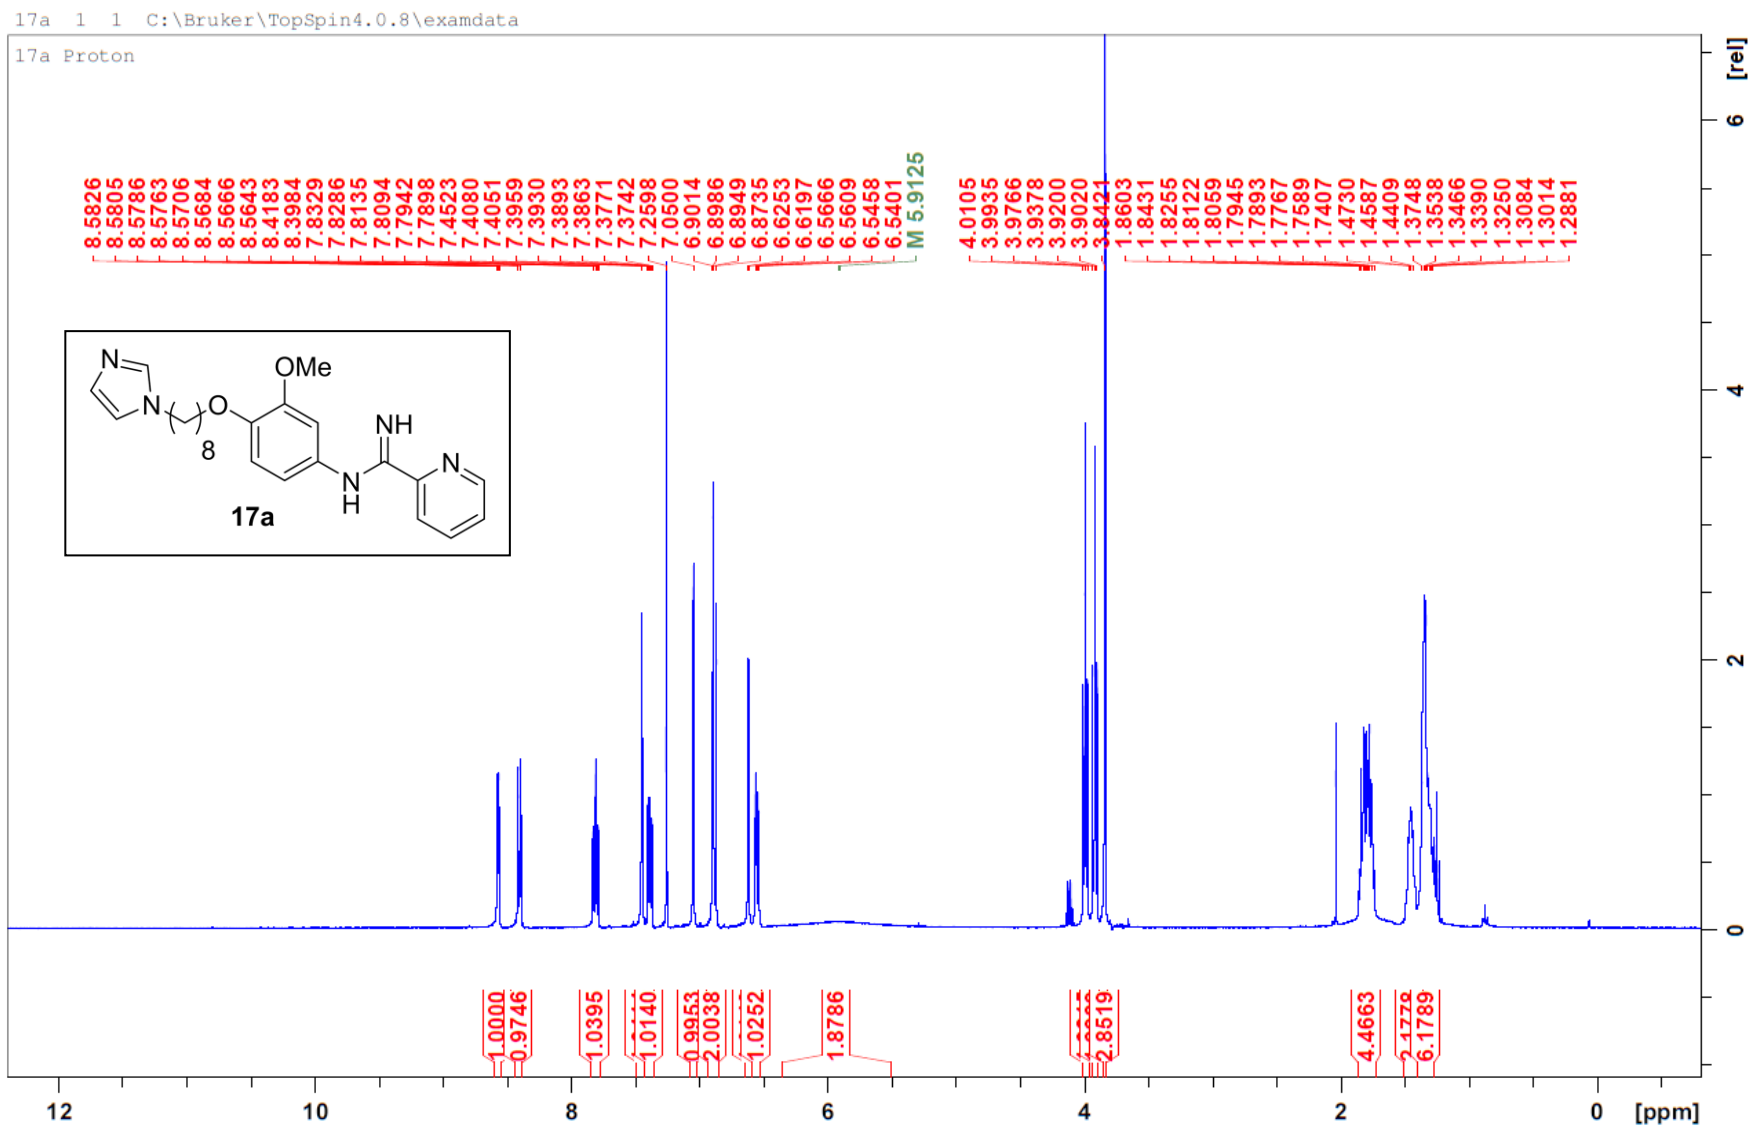

Figure S57.  $^1\text{H}$  NMR spectrum of compound **17a** (400 MHz,  $\text{CDCl}_3$ ).

17a 1 1 C:\Bruker\TopSpin4.0.8\examdata

17a Proton

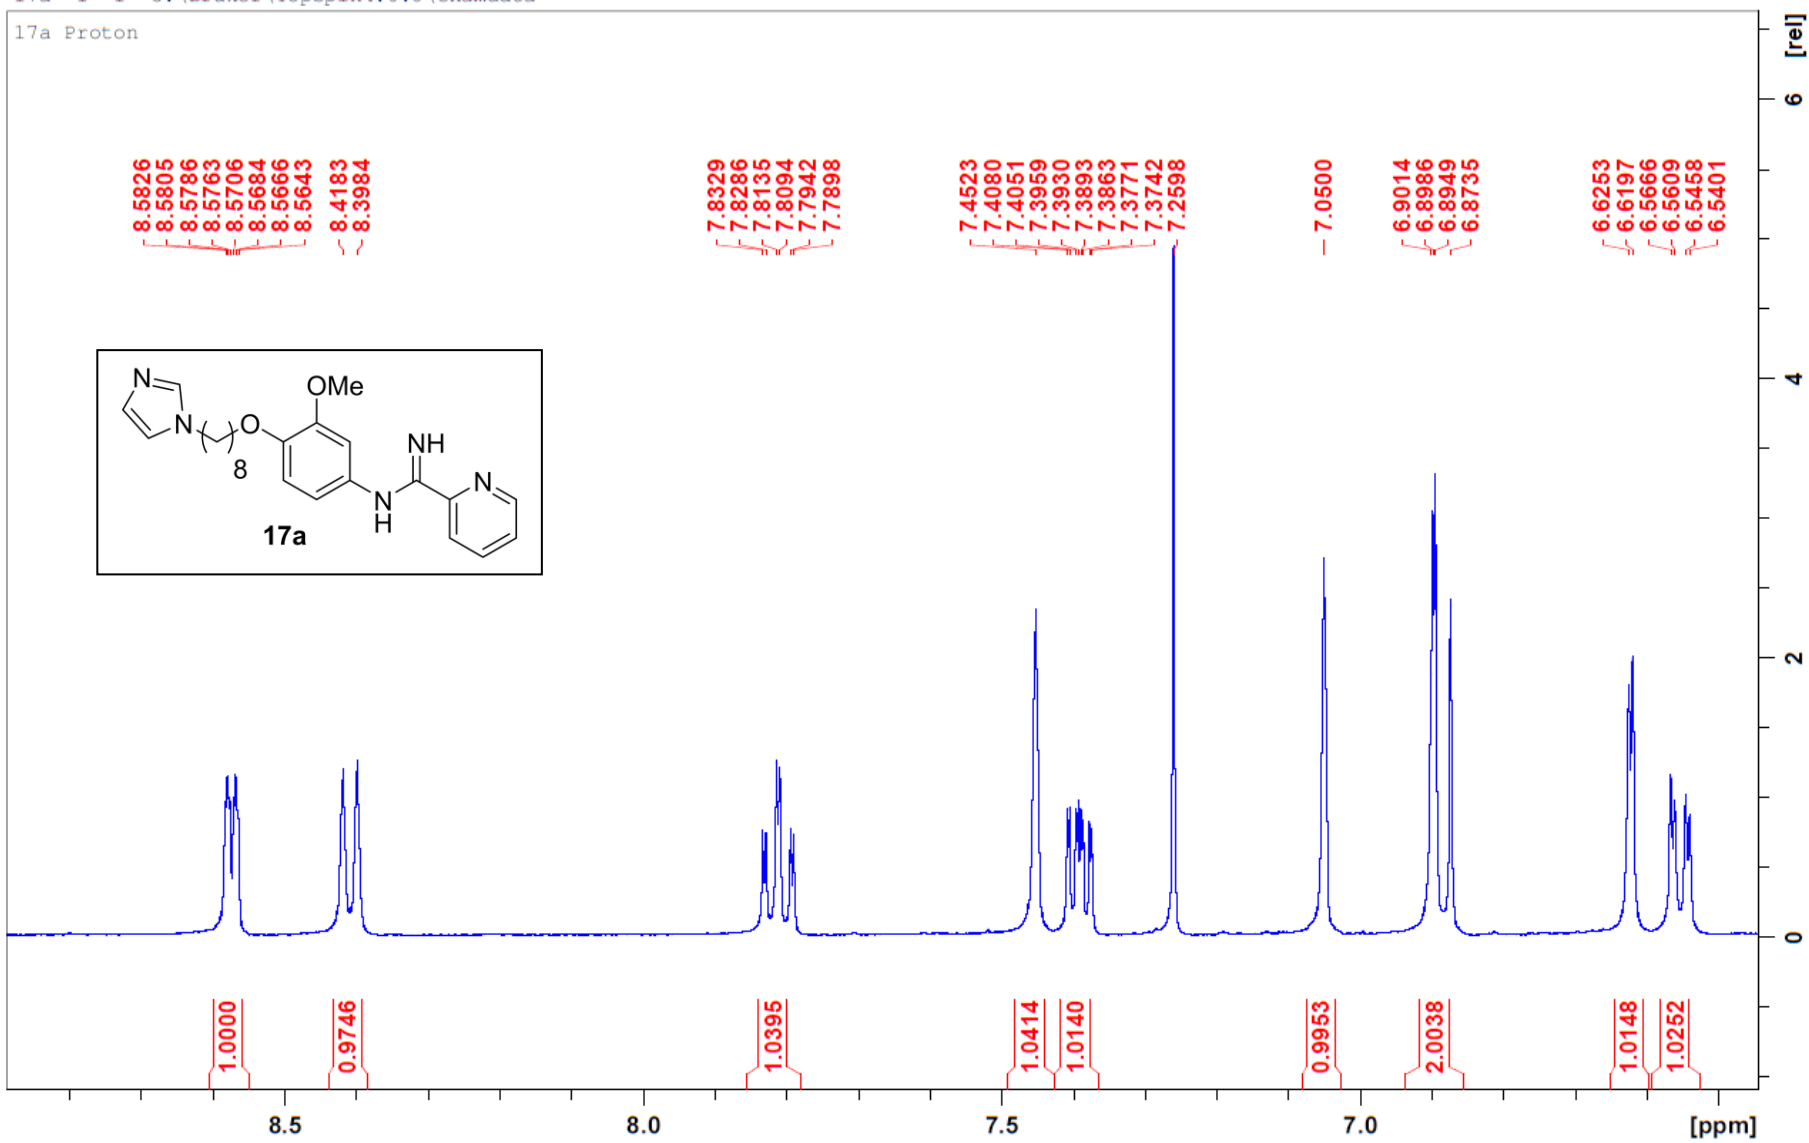

Figure S58. Expanded  $^1\text{H}$  NMR spectrum of compound **17a** (400 MHz,  $\text{CDCl}_3$ ).

17a 2 1 C:\Bruker\TopSpin4.0.8\examdata

17a Carbon

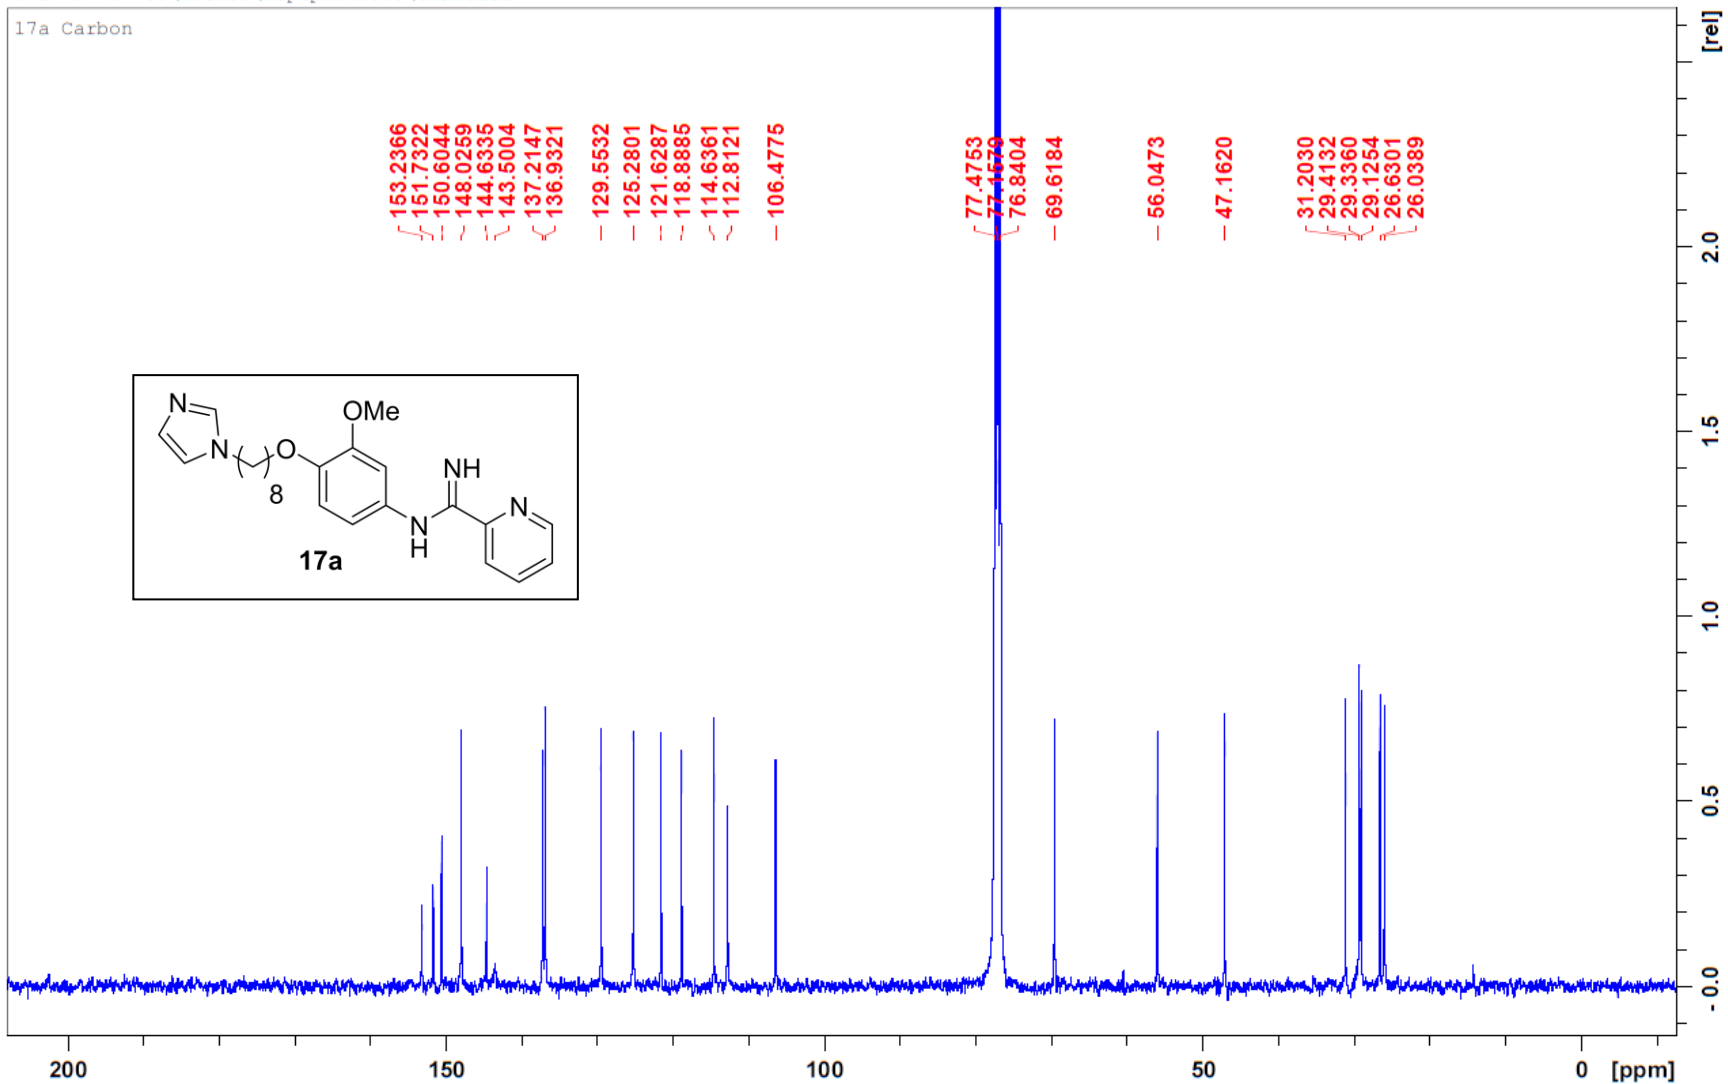

Figure S59.  $^{13}\text{C}$  NMR spectrum of compound **17a** (100 MHz,  $\text{CDCl}_3$ ).

17a 2 1 C:\Bruker\TopSpin4.0.8\examdata

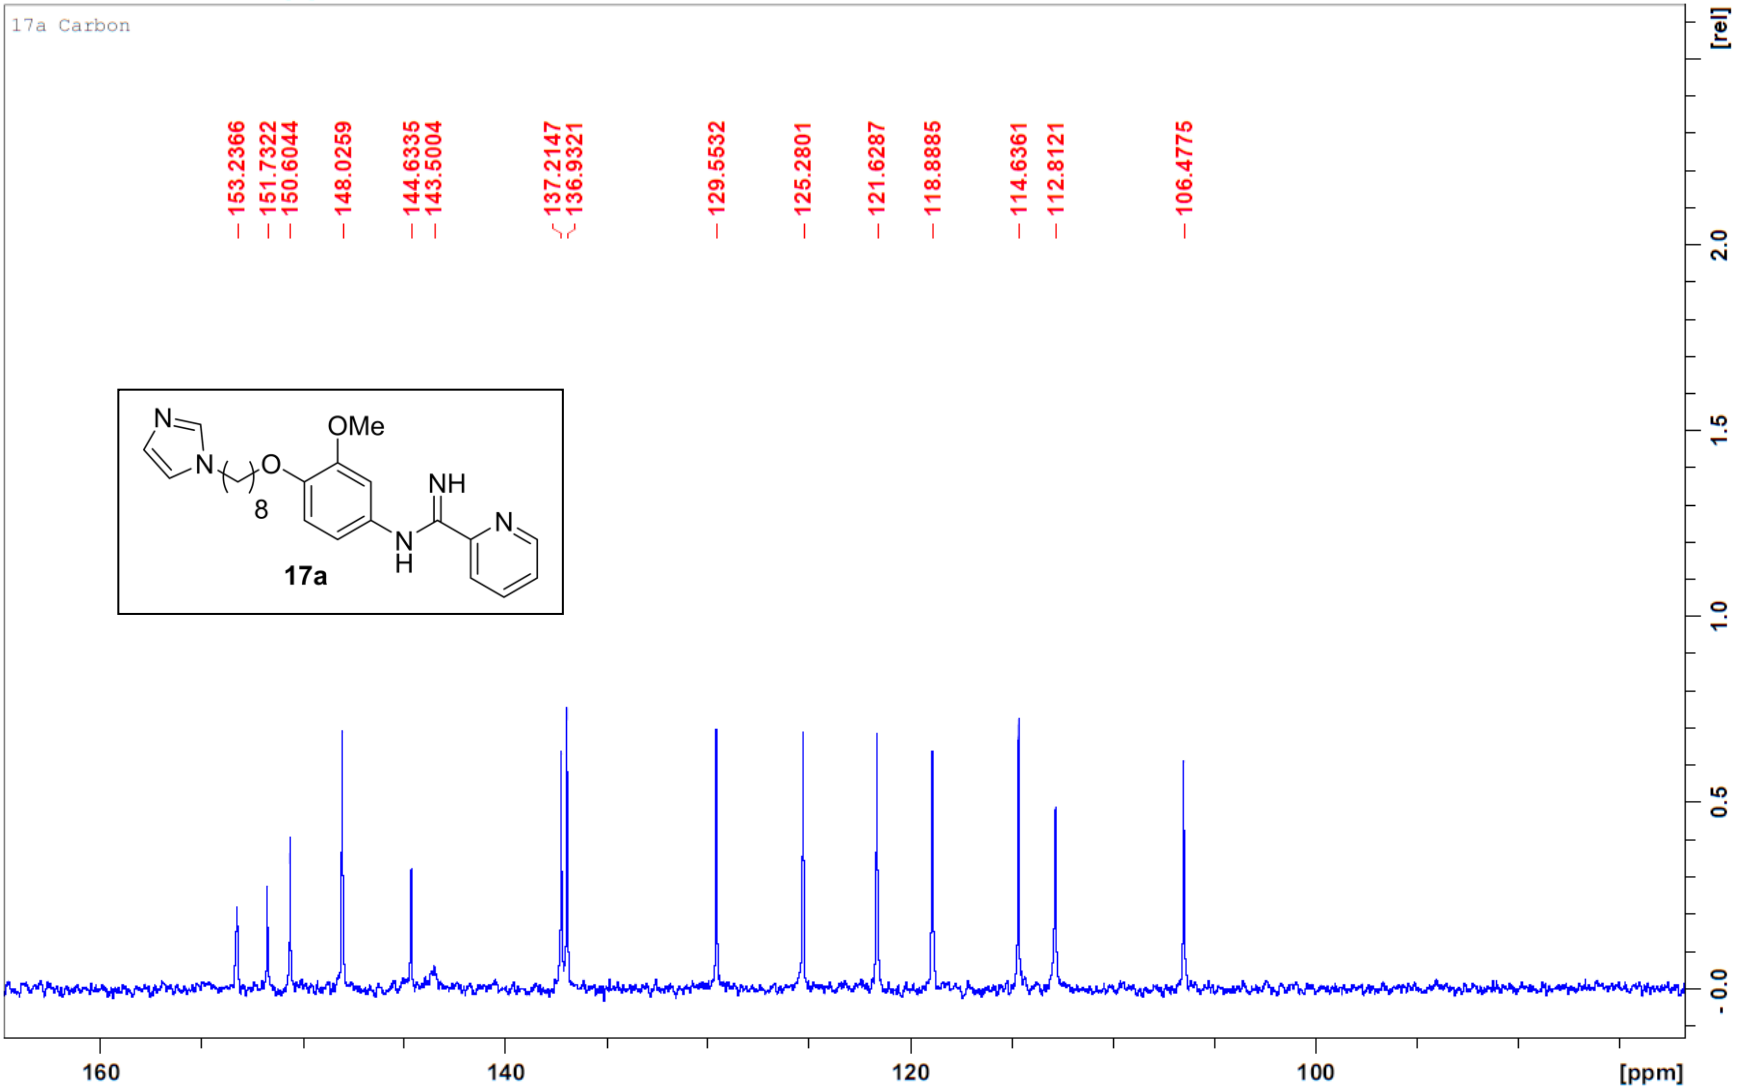

**Figure S60.** Expanded  $^{13}\text{C}$  NMR spectrum of compound **17a** (100 MHz,  $\text{CDCl}_3$ ).

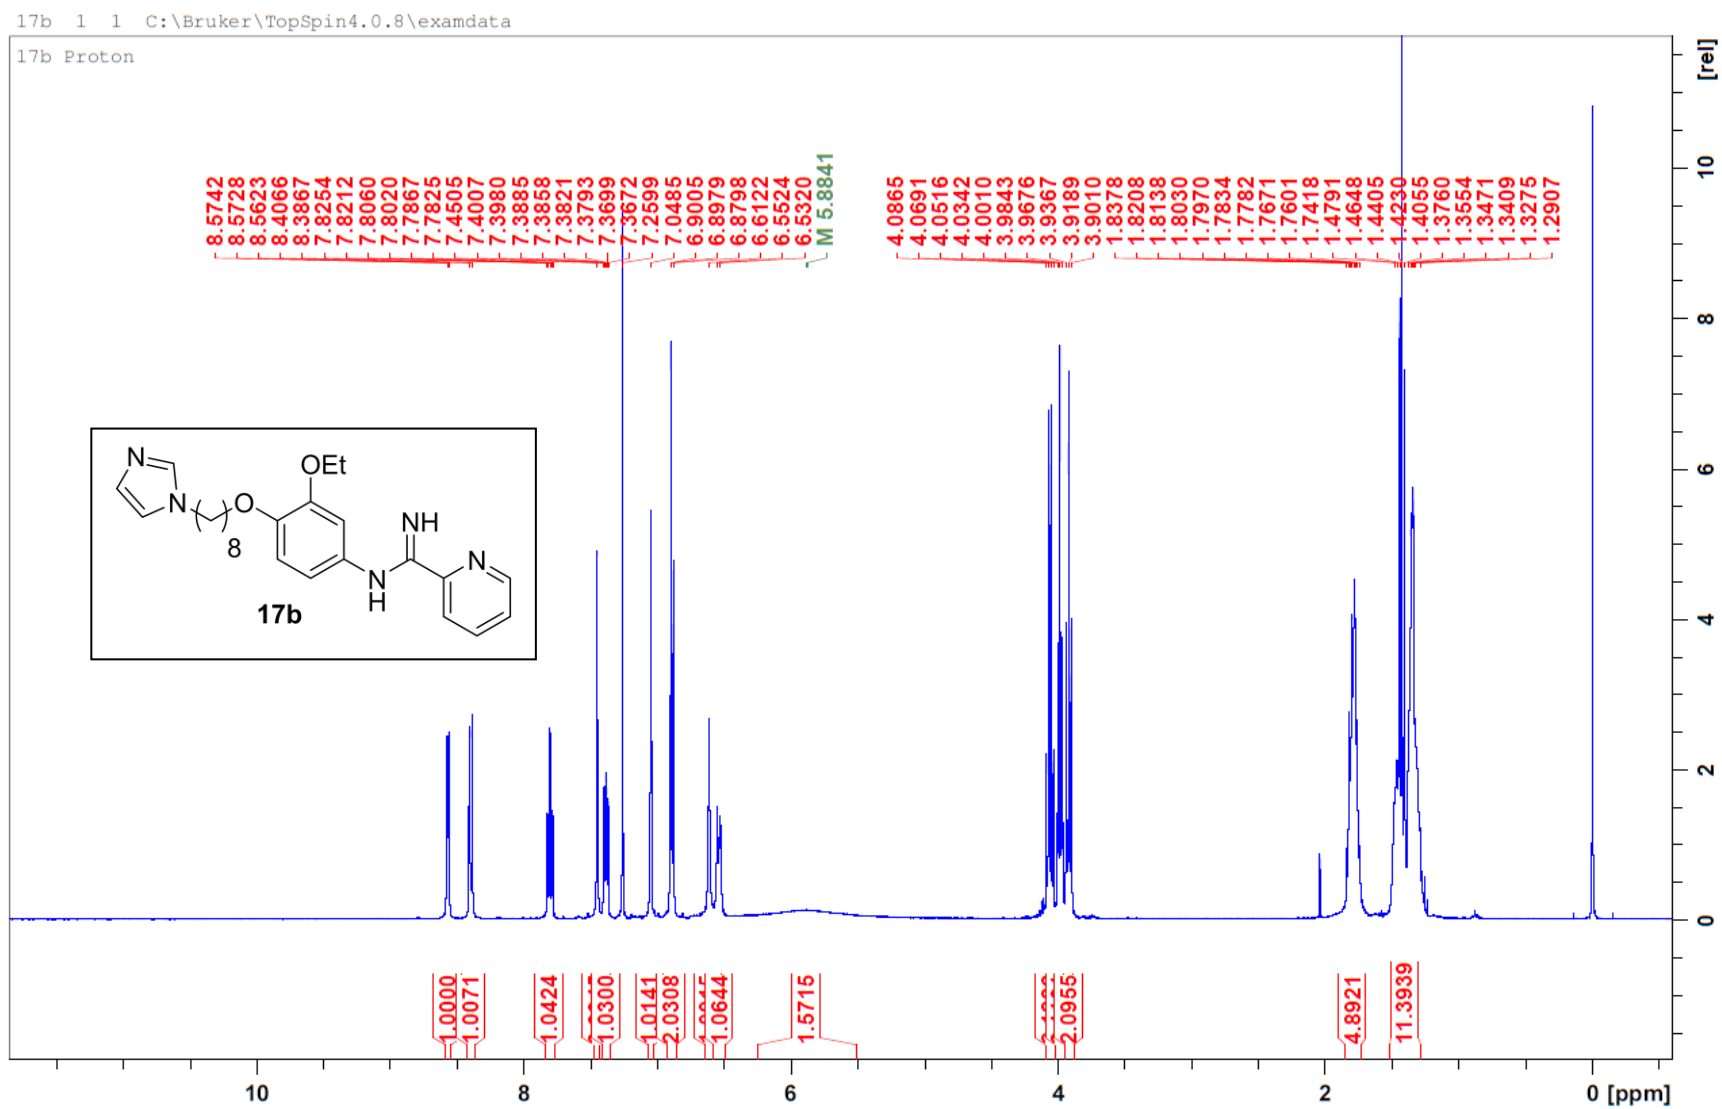

Figure S61.  $^1\text{H}$  NMR spectrum of compound **17b** (400 MHz,  $\text{CDCl}_3$ ).

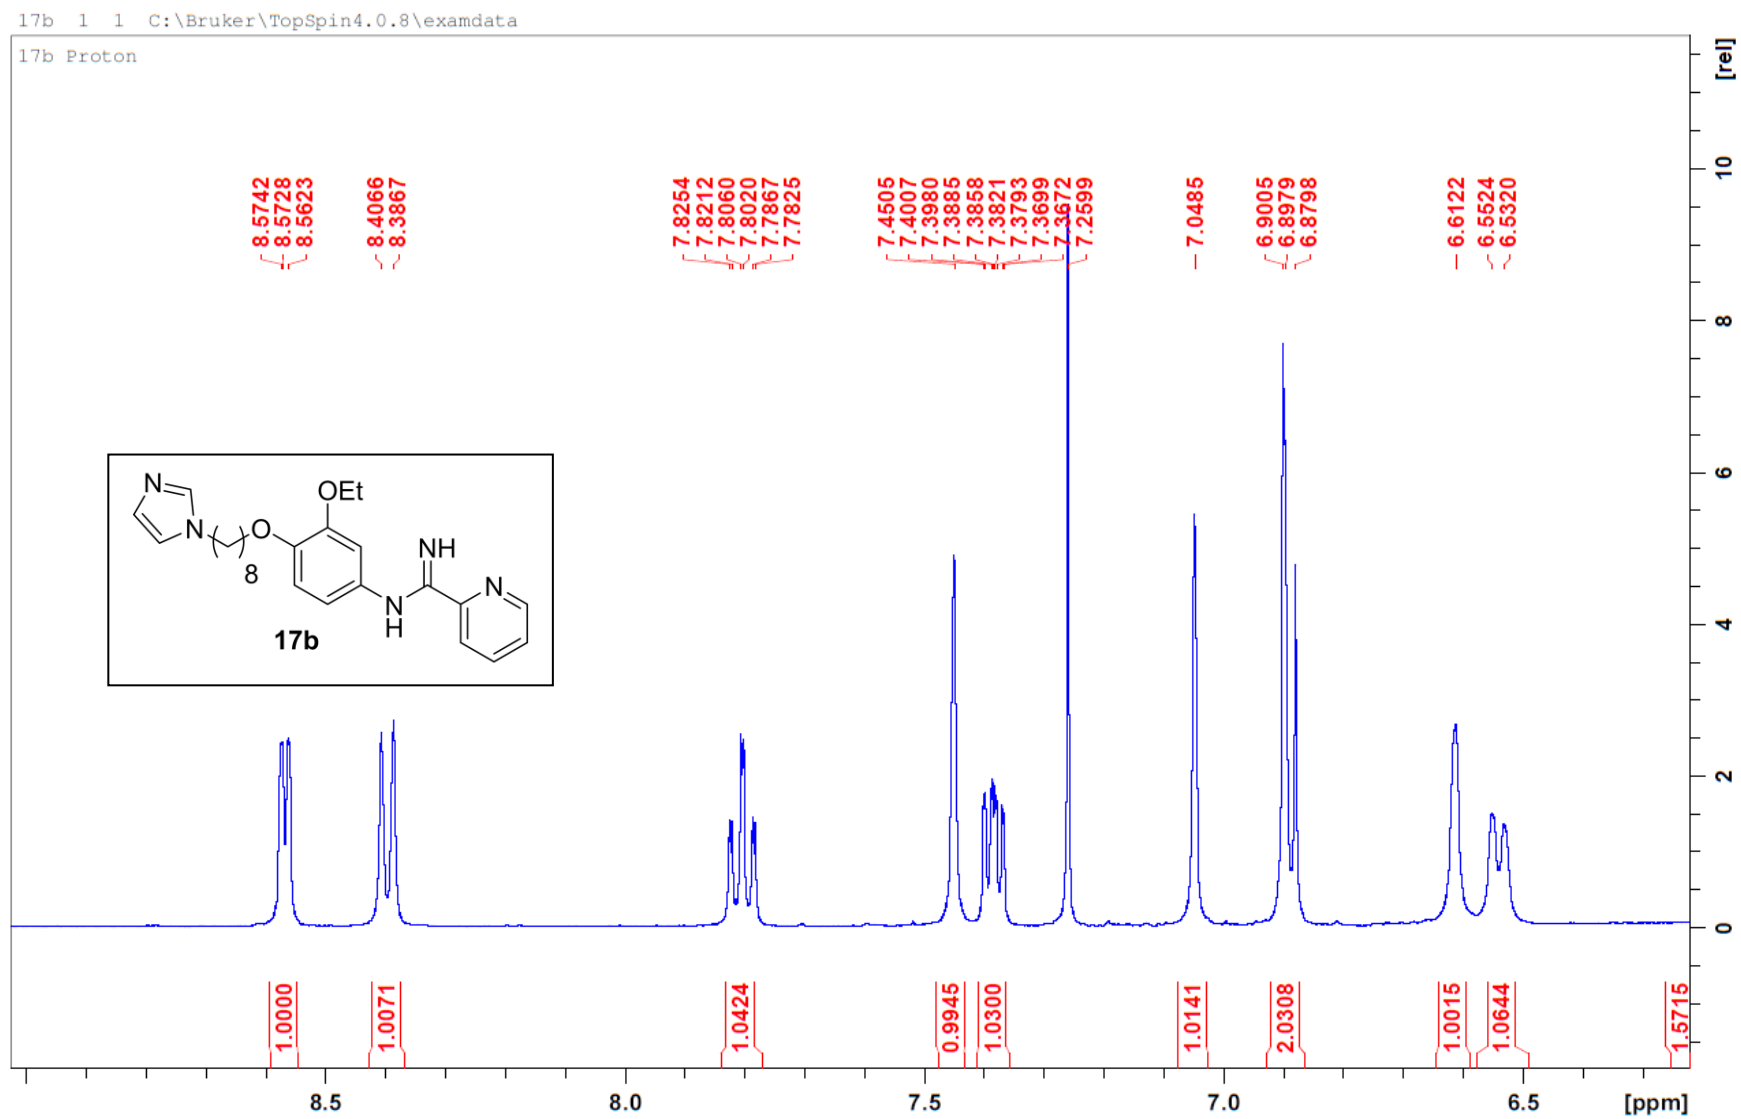

**Figure S62.** Expanded  $^1\text{H}$  NMR spectrum of compound **17b** (400 MHz,  $\text{CDCl}_3$ ).

17b 2 1 C:\Bruker\TopSpin4.0.8\examdata

17b carbon

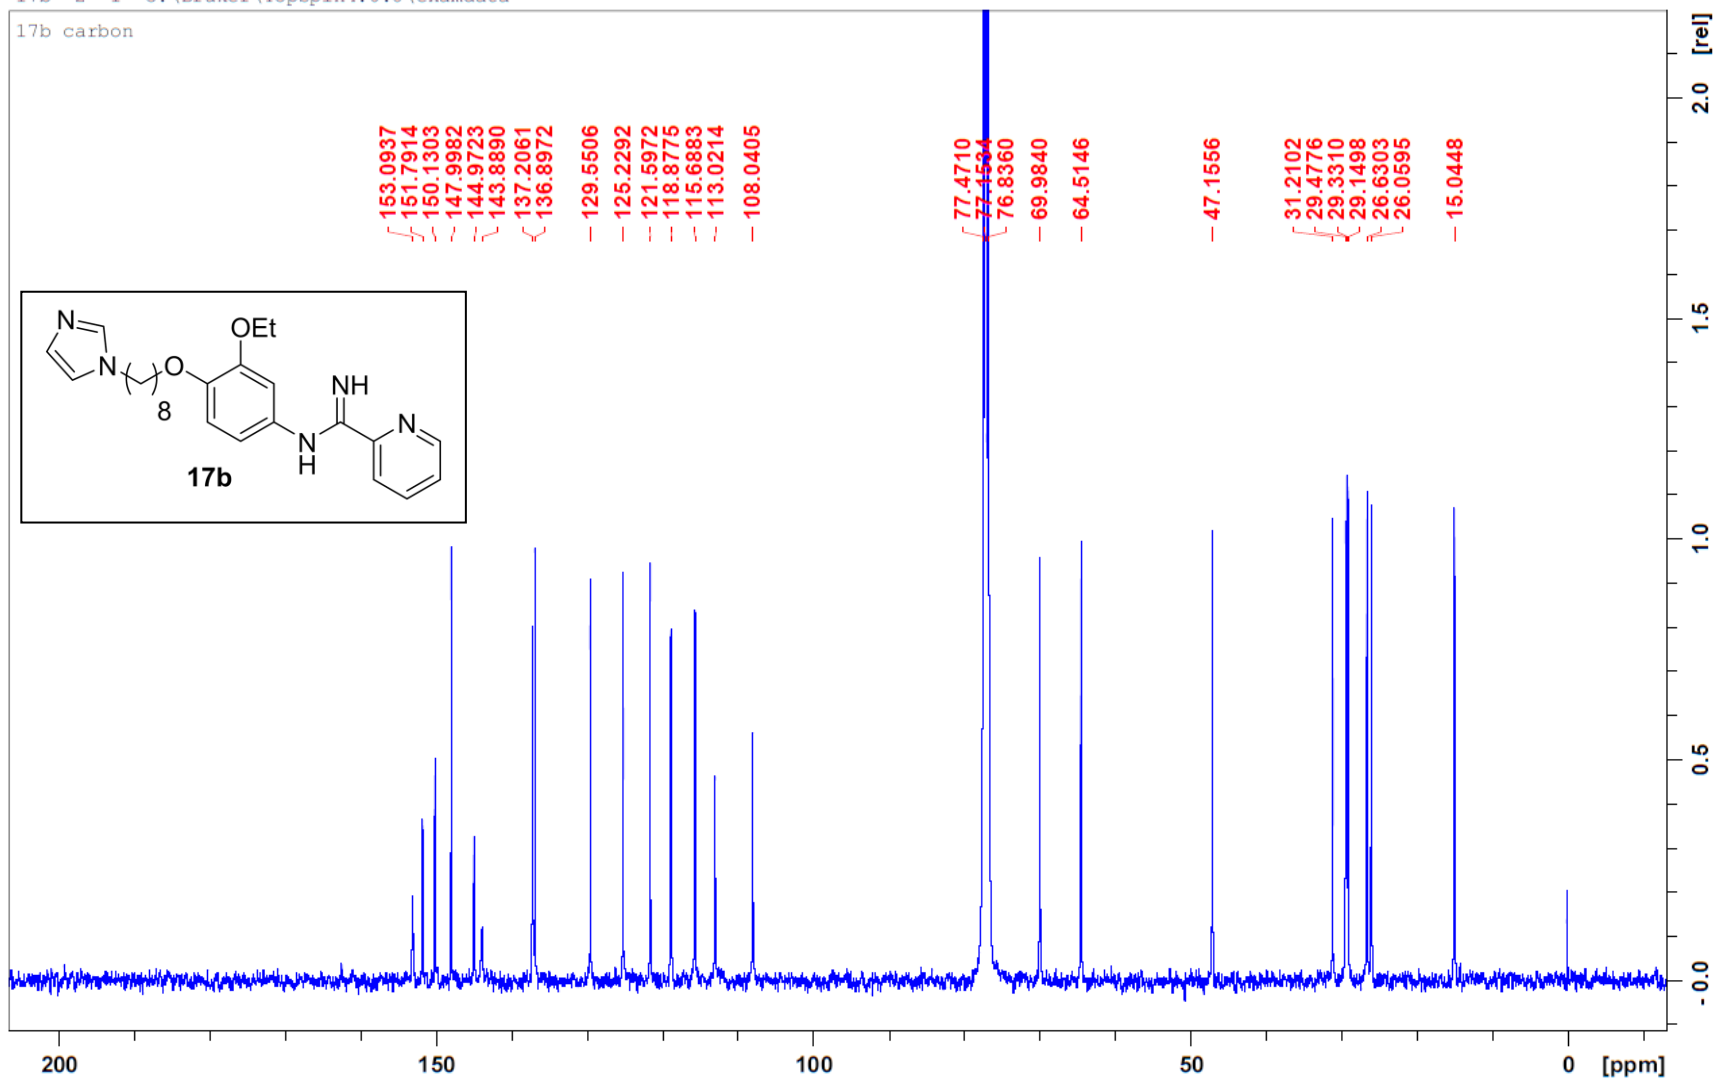

Figure S63. <sup>13</sup>C NMR spectrum of compound **17b** (100 MHz, CDCl<sub>3</sub>).



17b 2 1 C:\Bruker\TopSpin4.0.8\examdata

17b carbon

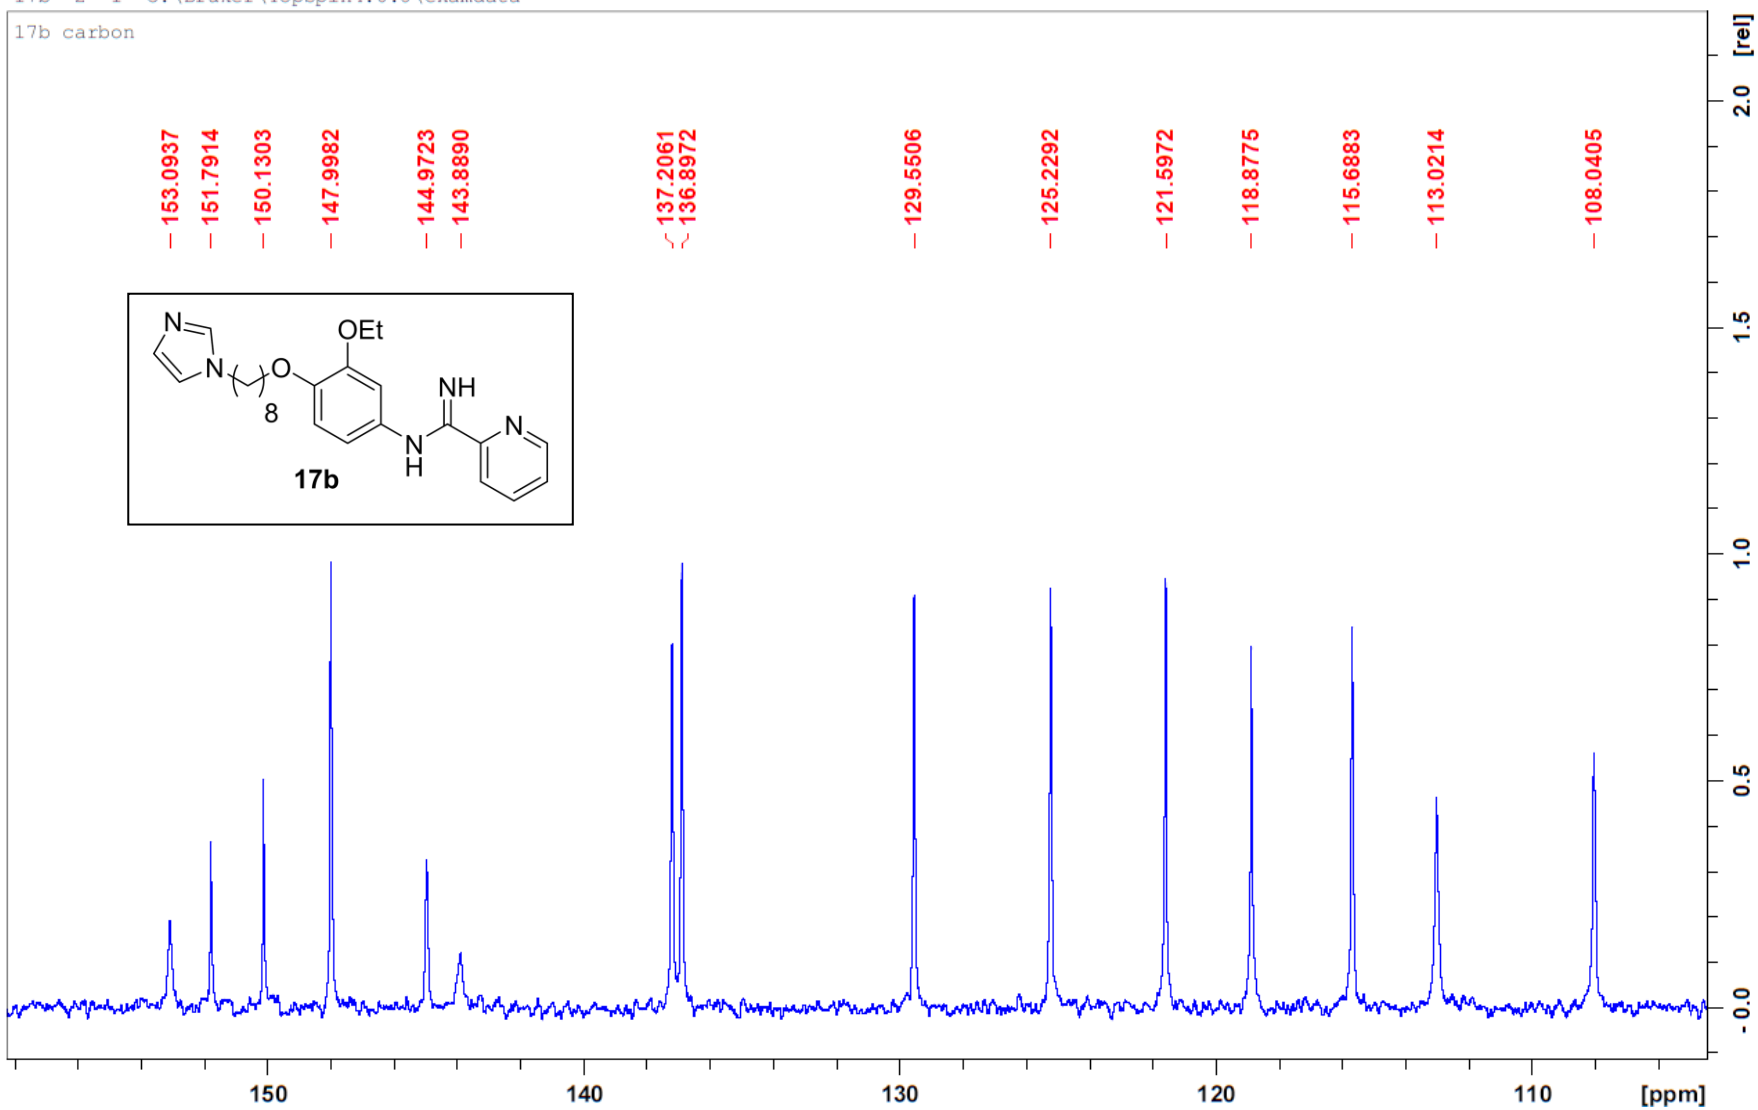

**Figure S64.** Expanded  $^{13}\text{C}$  NMR spectrum of compound **17b** (100 MHz,  $\text{CDCl}_3$ ).

17c 1 1 C:\Bruker\TopSpin4.0.8\examdata

17c Proton

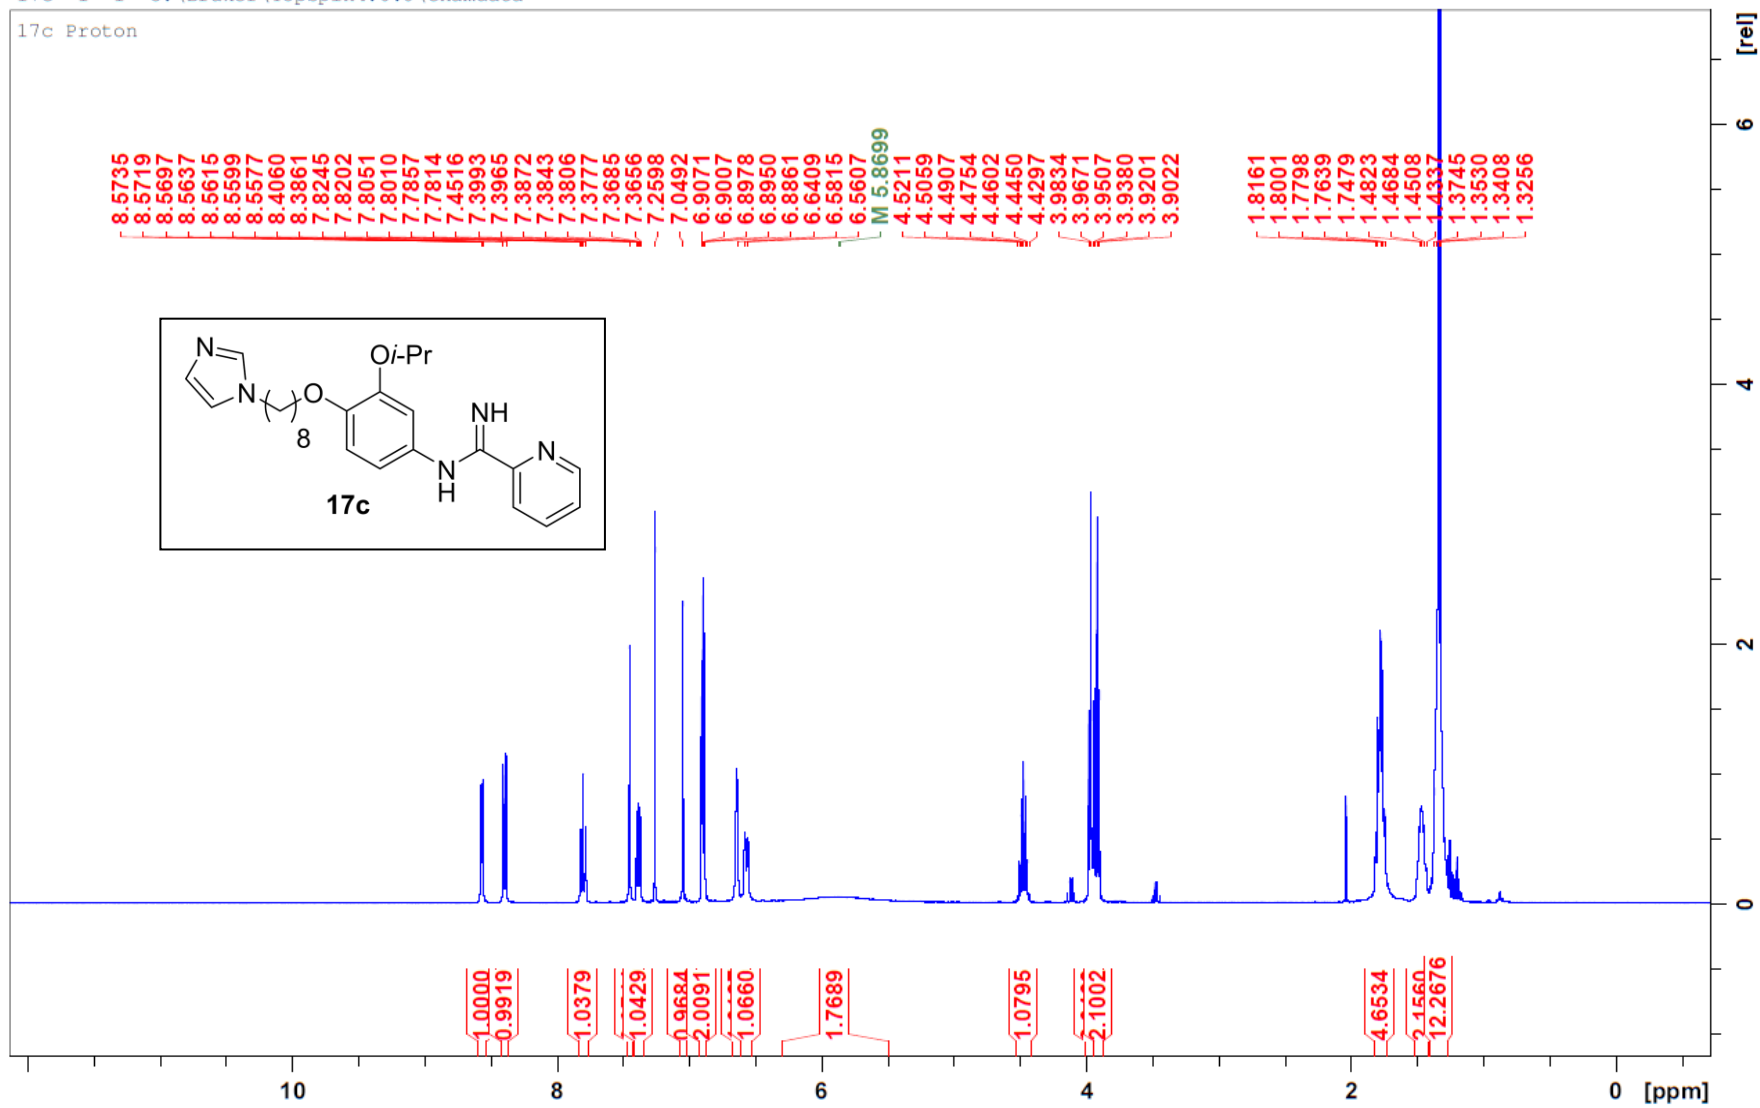

Figure S65. <sup>1</sup>H NMR spectrum of compound 17c (400 MHz, CDCl<sub>3</sub>).

17c 1 1 C:\Bruker\TopSpin4.0.8\examdata

17c Proton

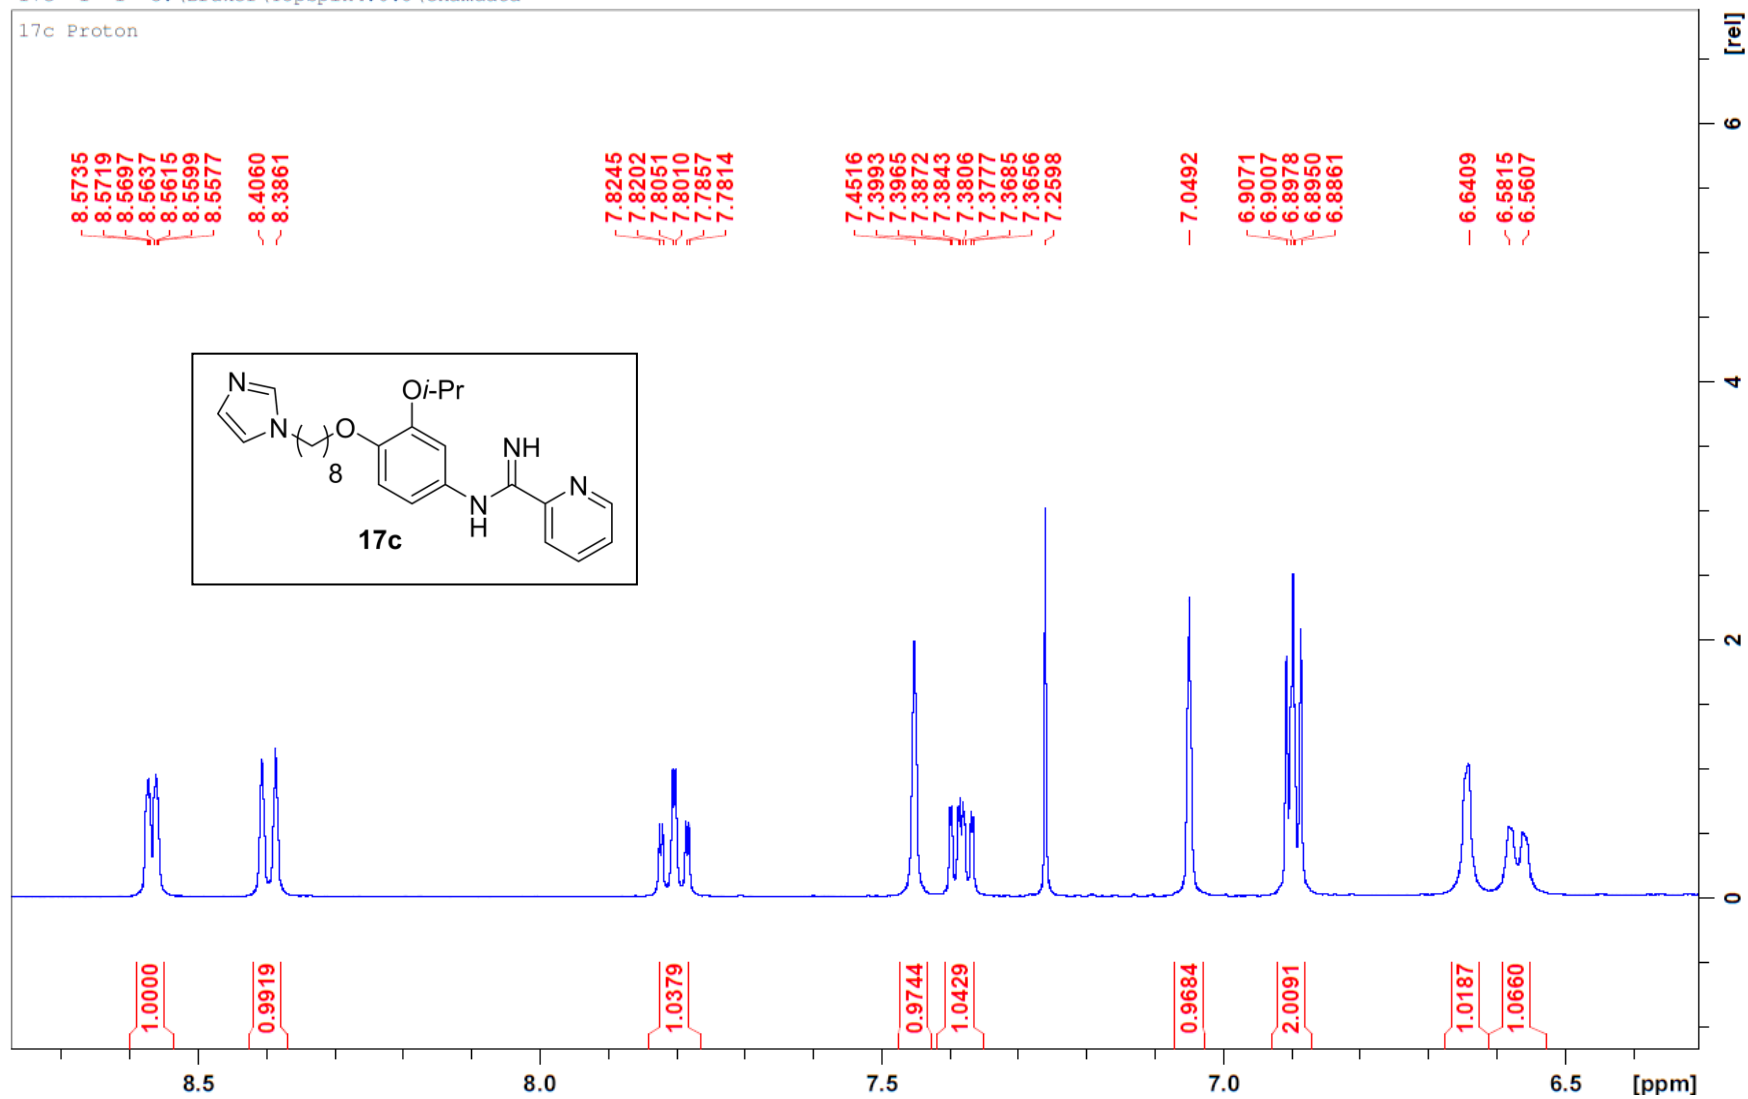

**Figure S66.** Expanded  $^1\text{H}$  NMR spectrum of compound **17c** (400 MHz,  $\text{CDCl}_3$ ).

17c 2 1 C:\Bruker\TopSpin4.0.8\examdata

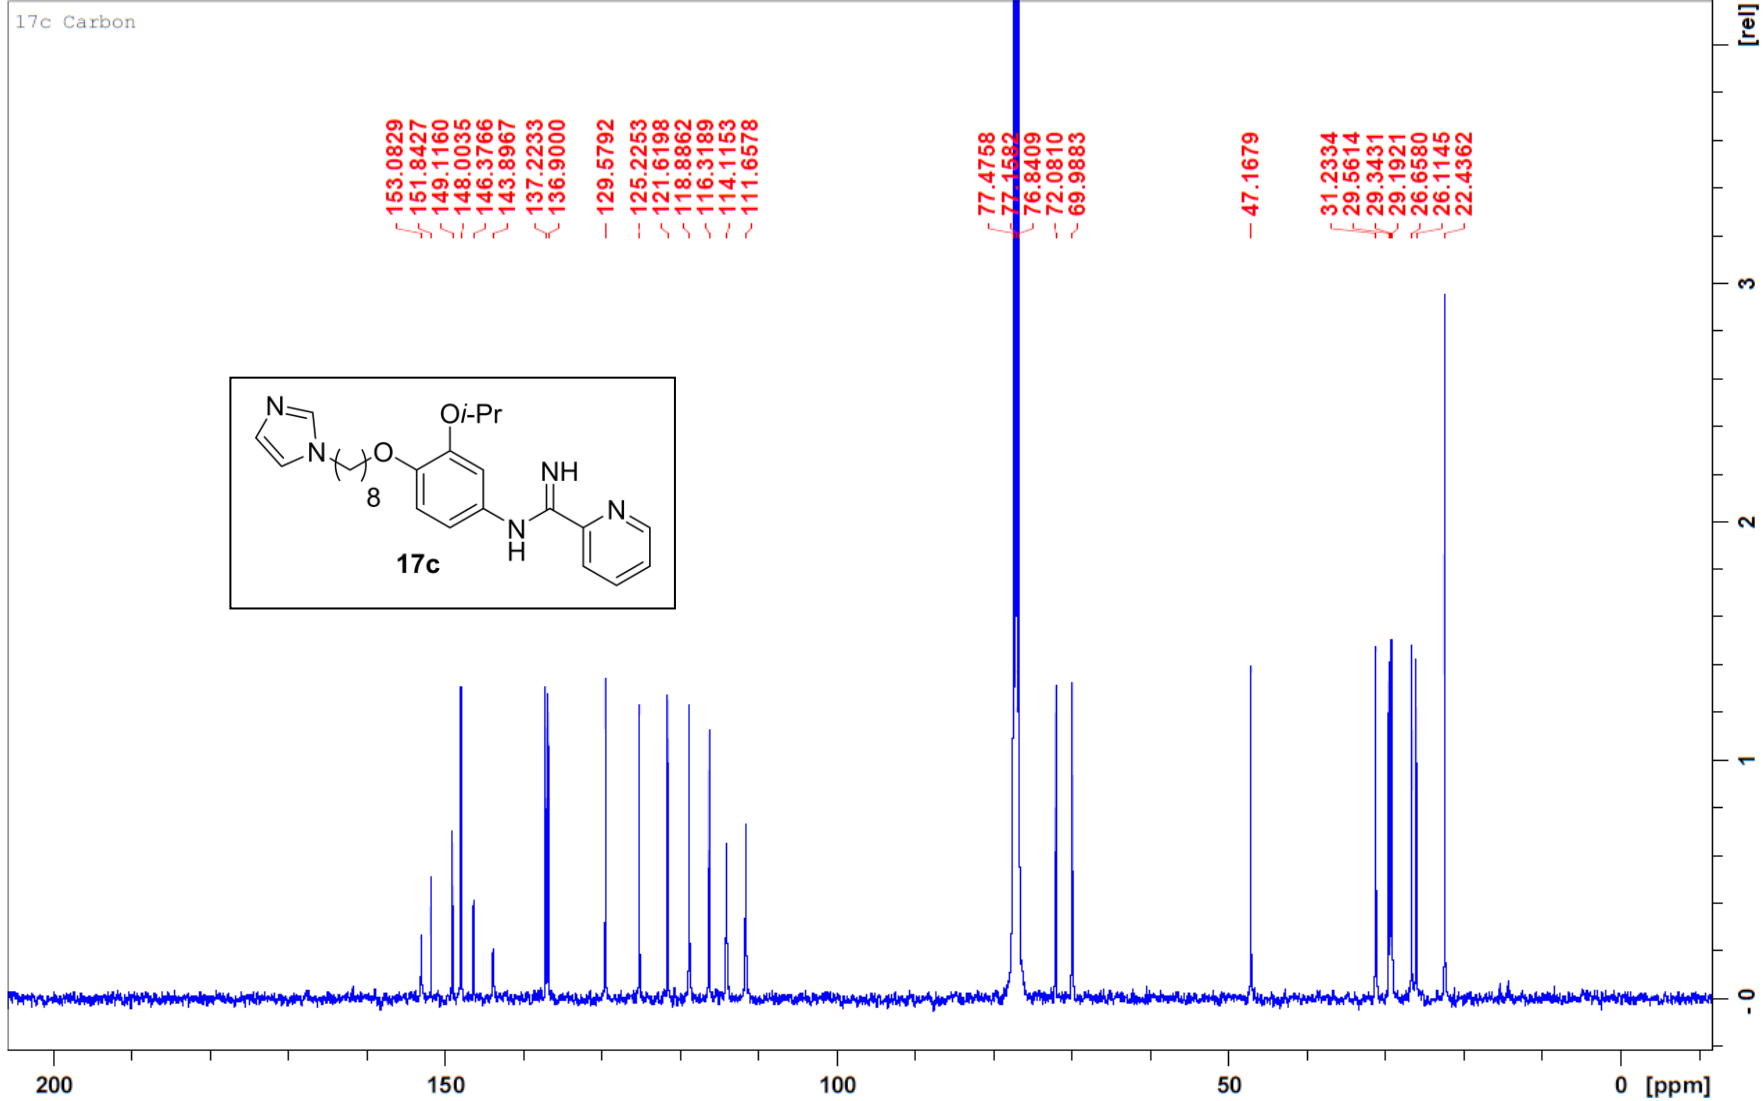

Figure S67.  $^{13}\text{C}$  NMR spectrum of compound **17c** (100 MHz,  $\text{CDCl}_3$ ).

17c 2 1 C:\Bruker\TopSpin4.0.8\examdata

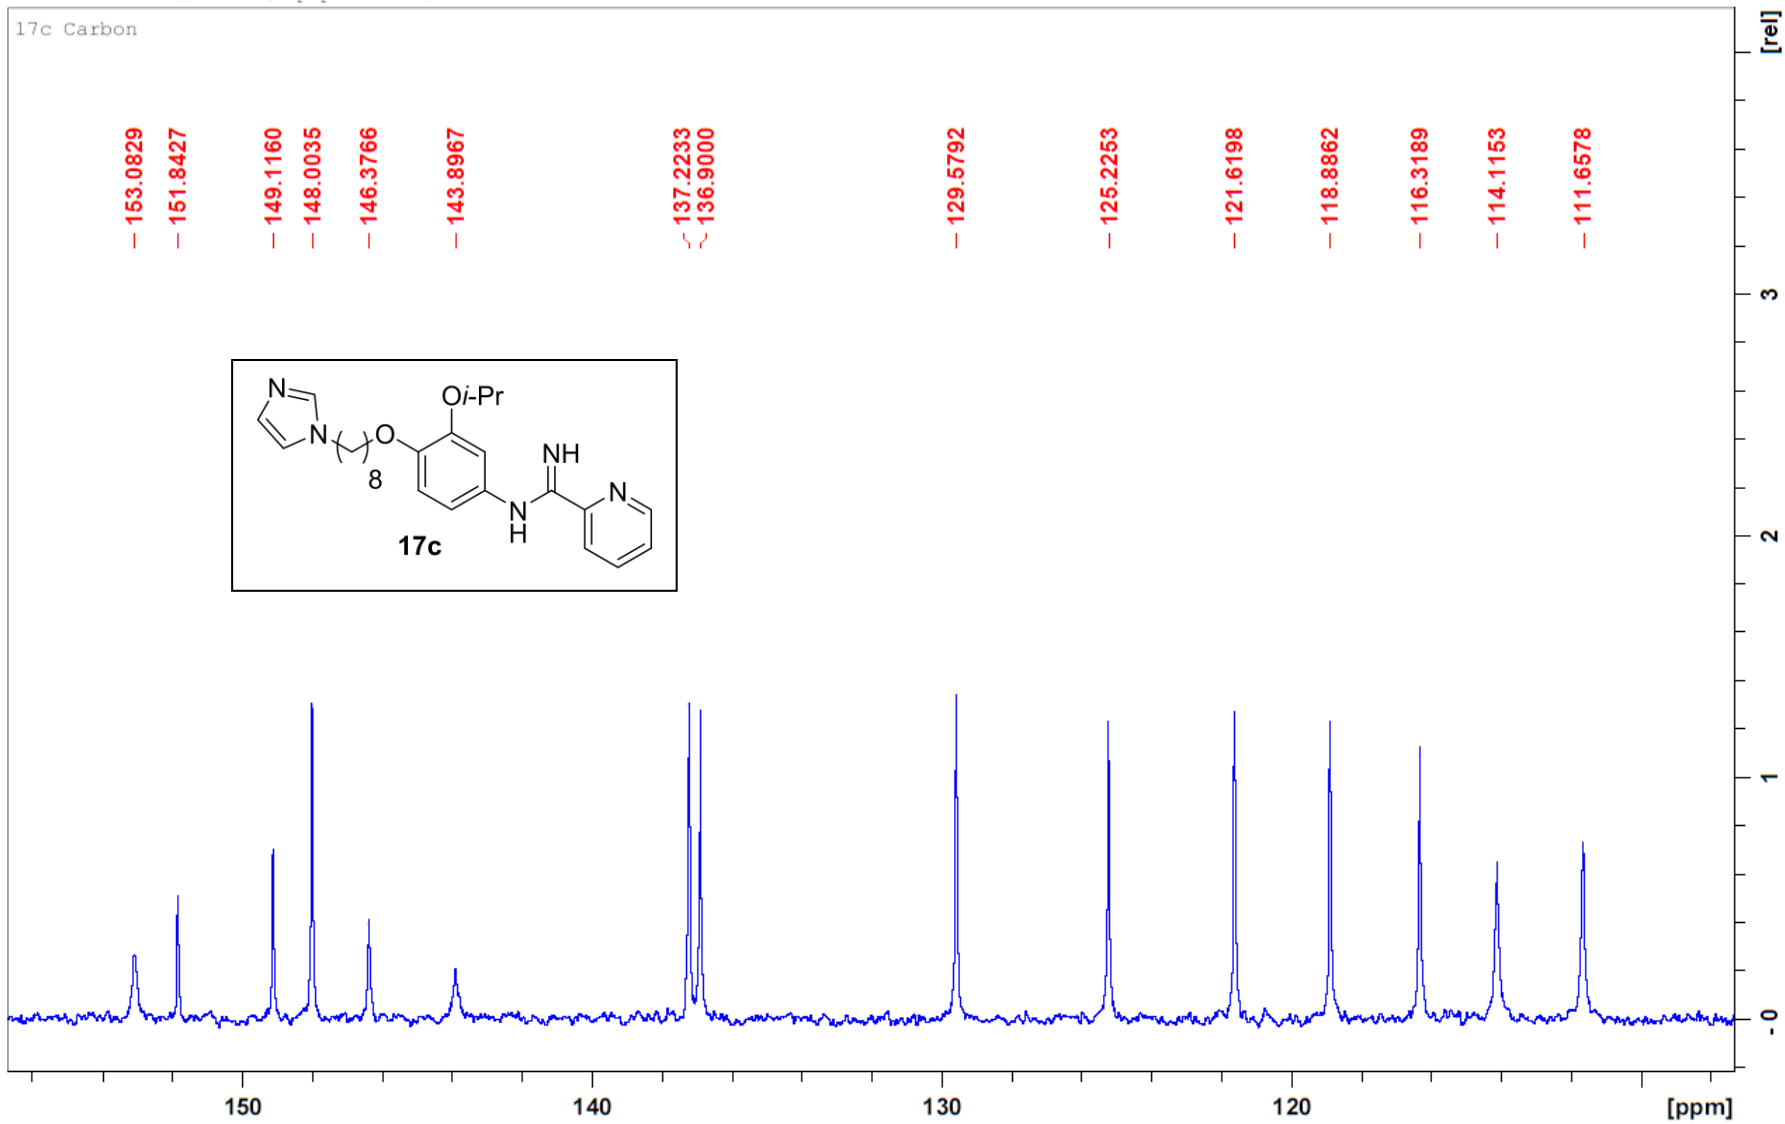

Figure S68. Expanded  $^{13}\text{C}$  NMR spectrum of compound **17c** (100 MHz,  $\text{CDCl}_3$ ).

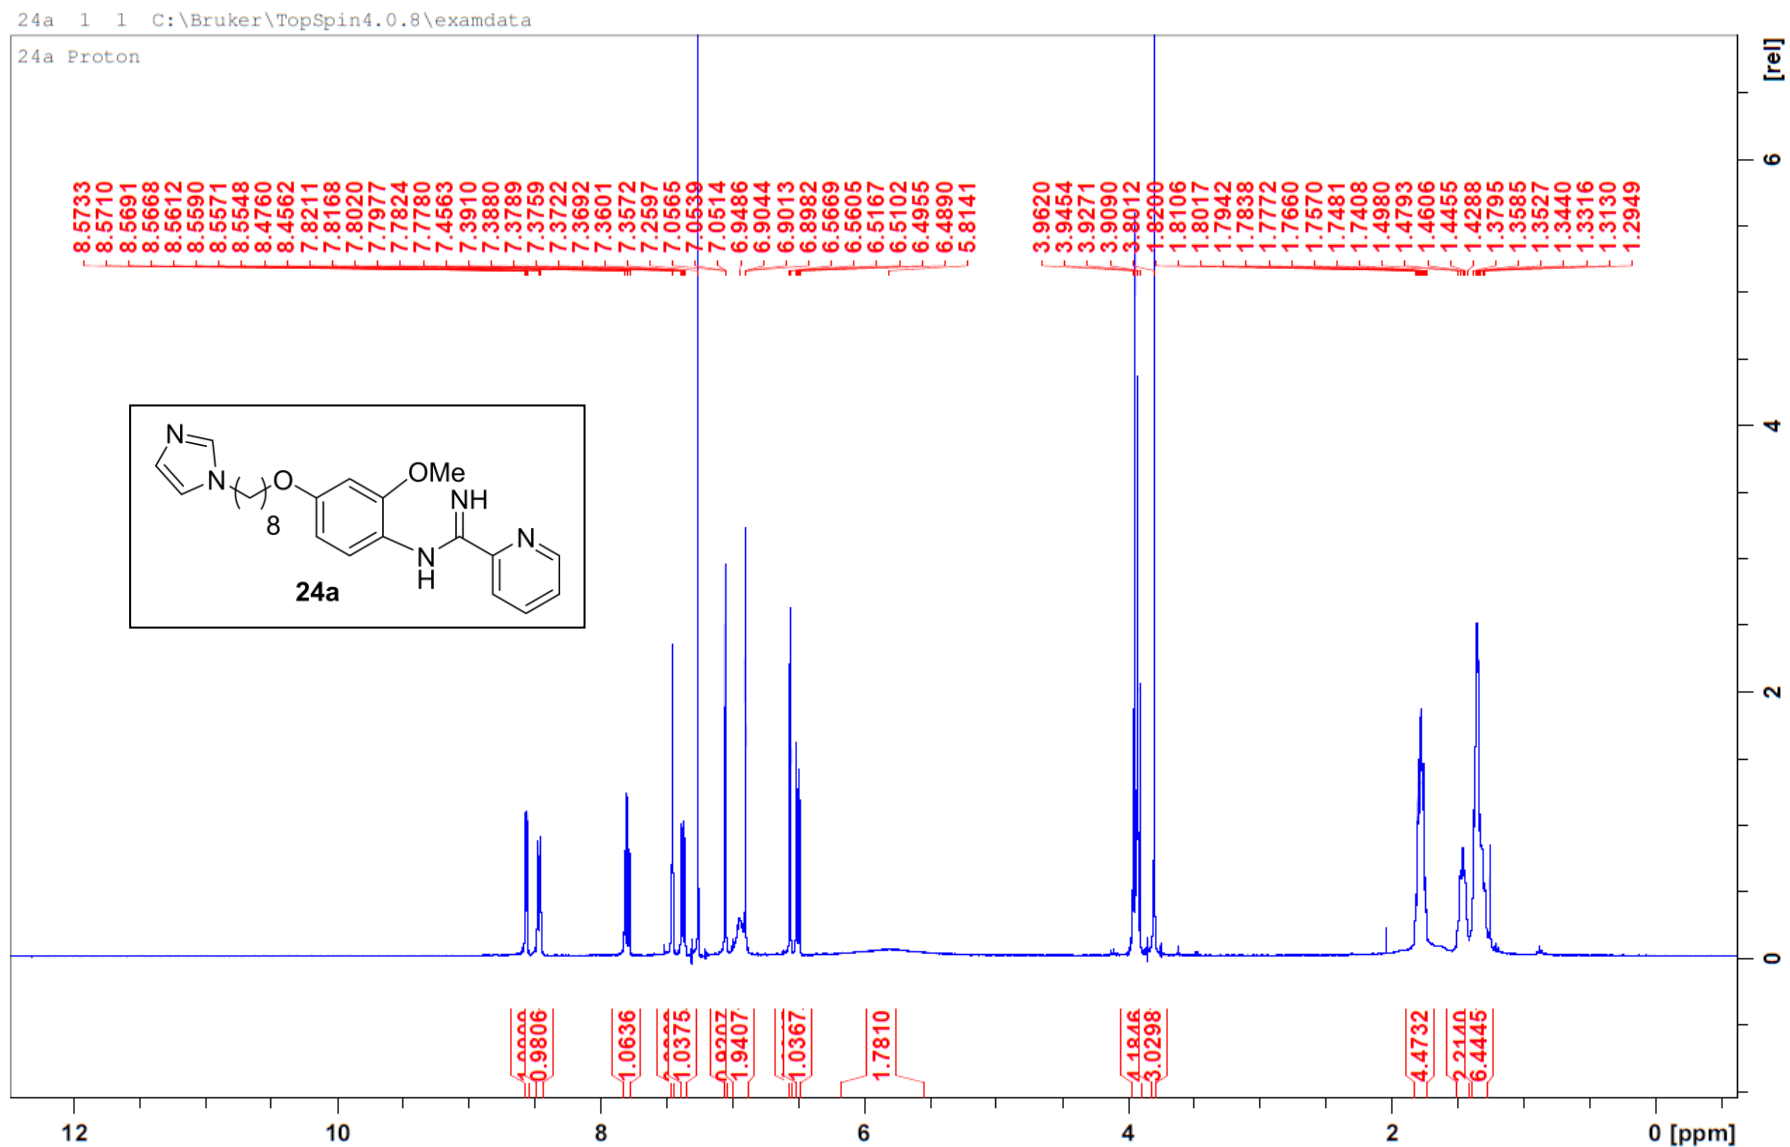

Figure S69.  $^1\text{H}$  NMR spectrum of compound **24a** (400 MHz,  $\text{CDCl}_3$ ).

24a 1 1 C:\Bruker\TopSpin4.0.8\examdata

24a Proton

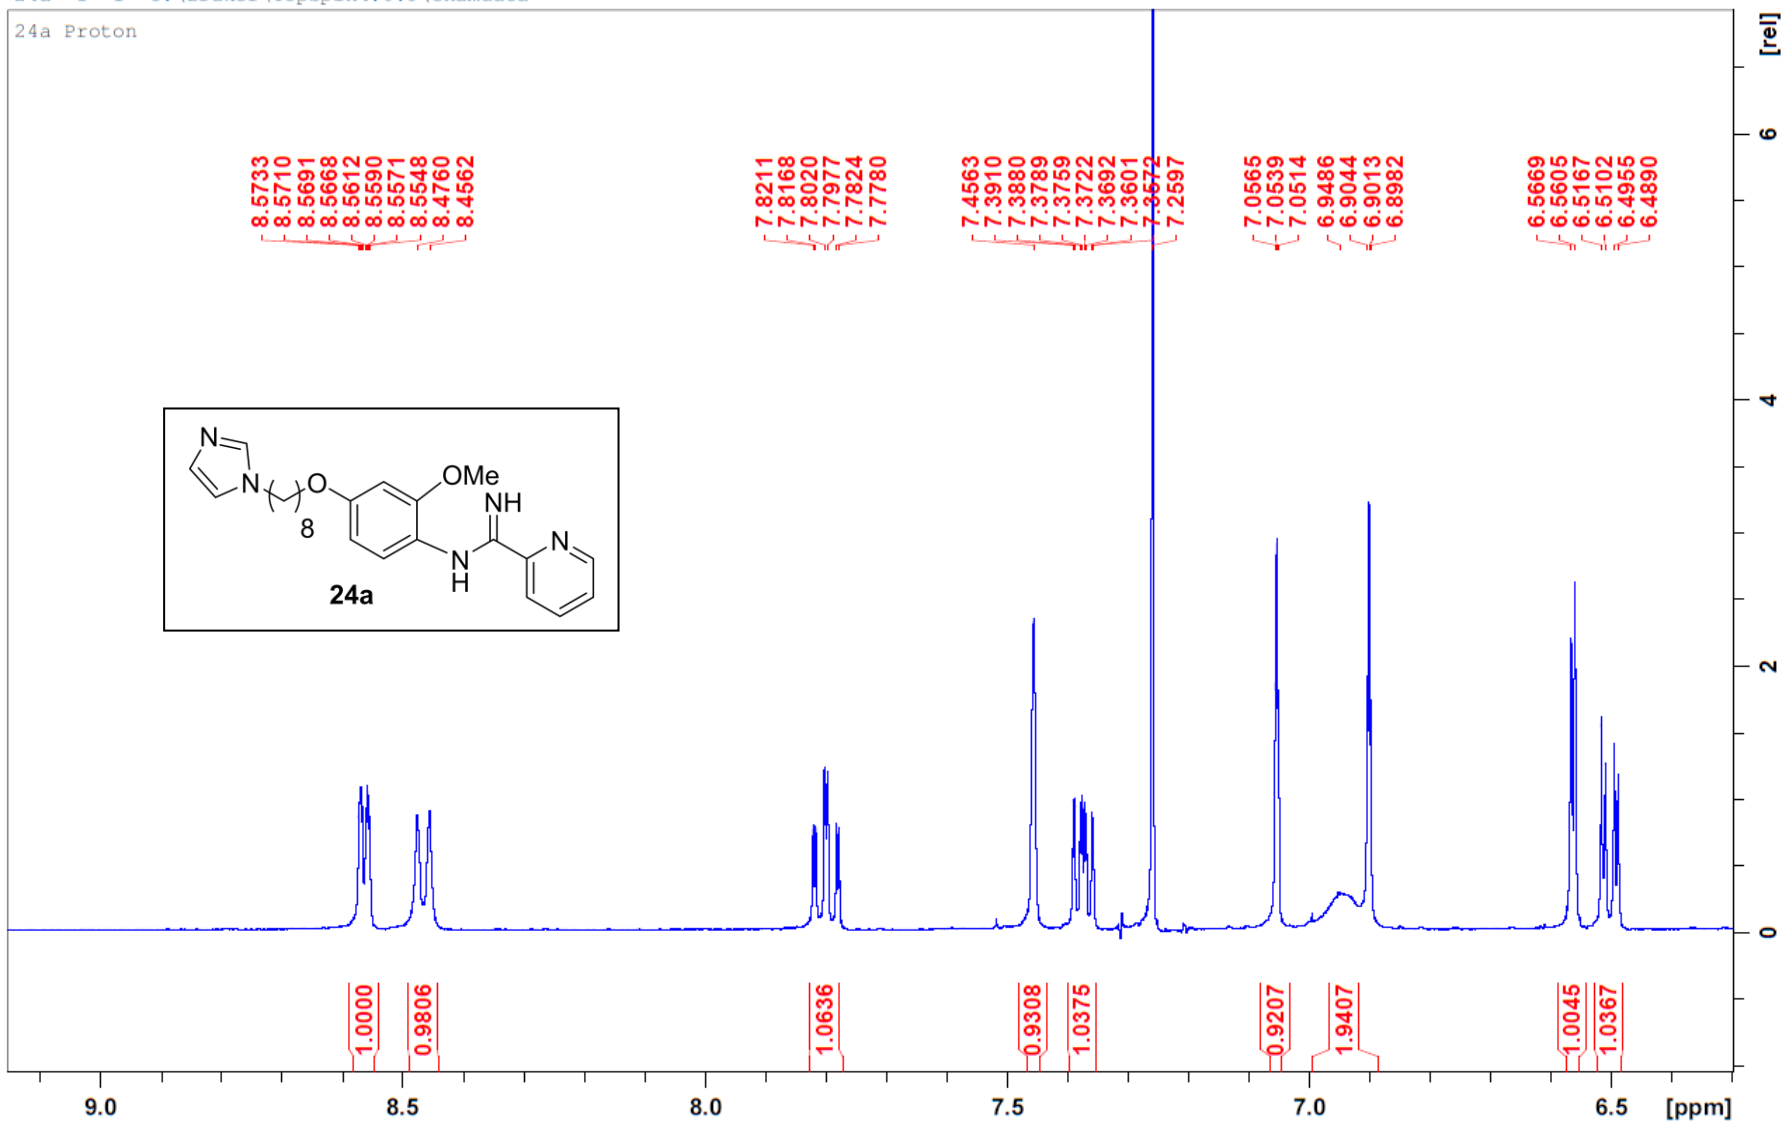

Figure S70. Expanded <sup>1</sup>H NMR spectrum of compound 24a (400 MHz, CDCl<sub>3</sub>).

24a 2 1 C:\Bruker\TopSpin4.0.8\examdata

24a Carbon

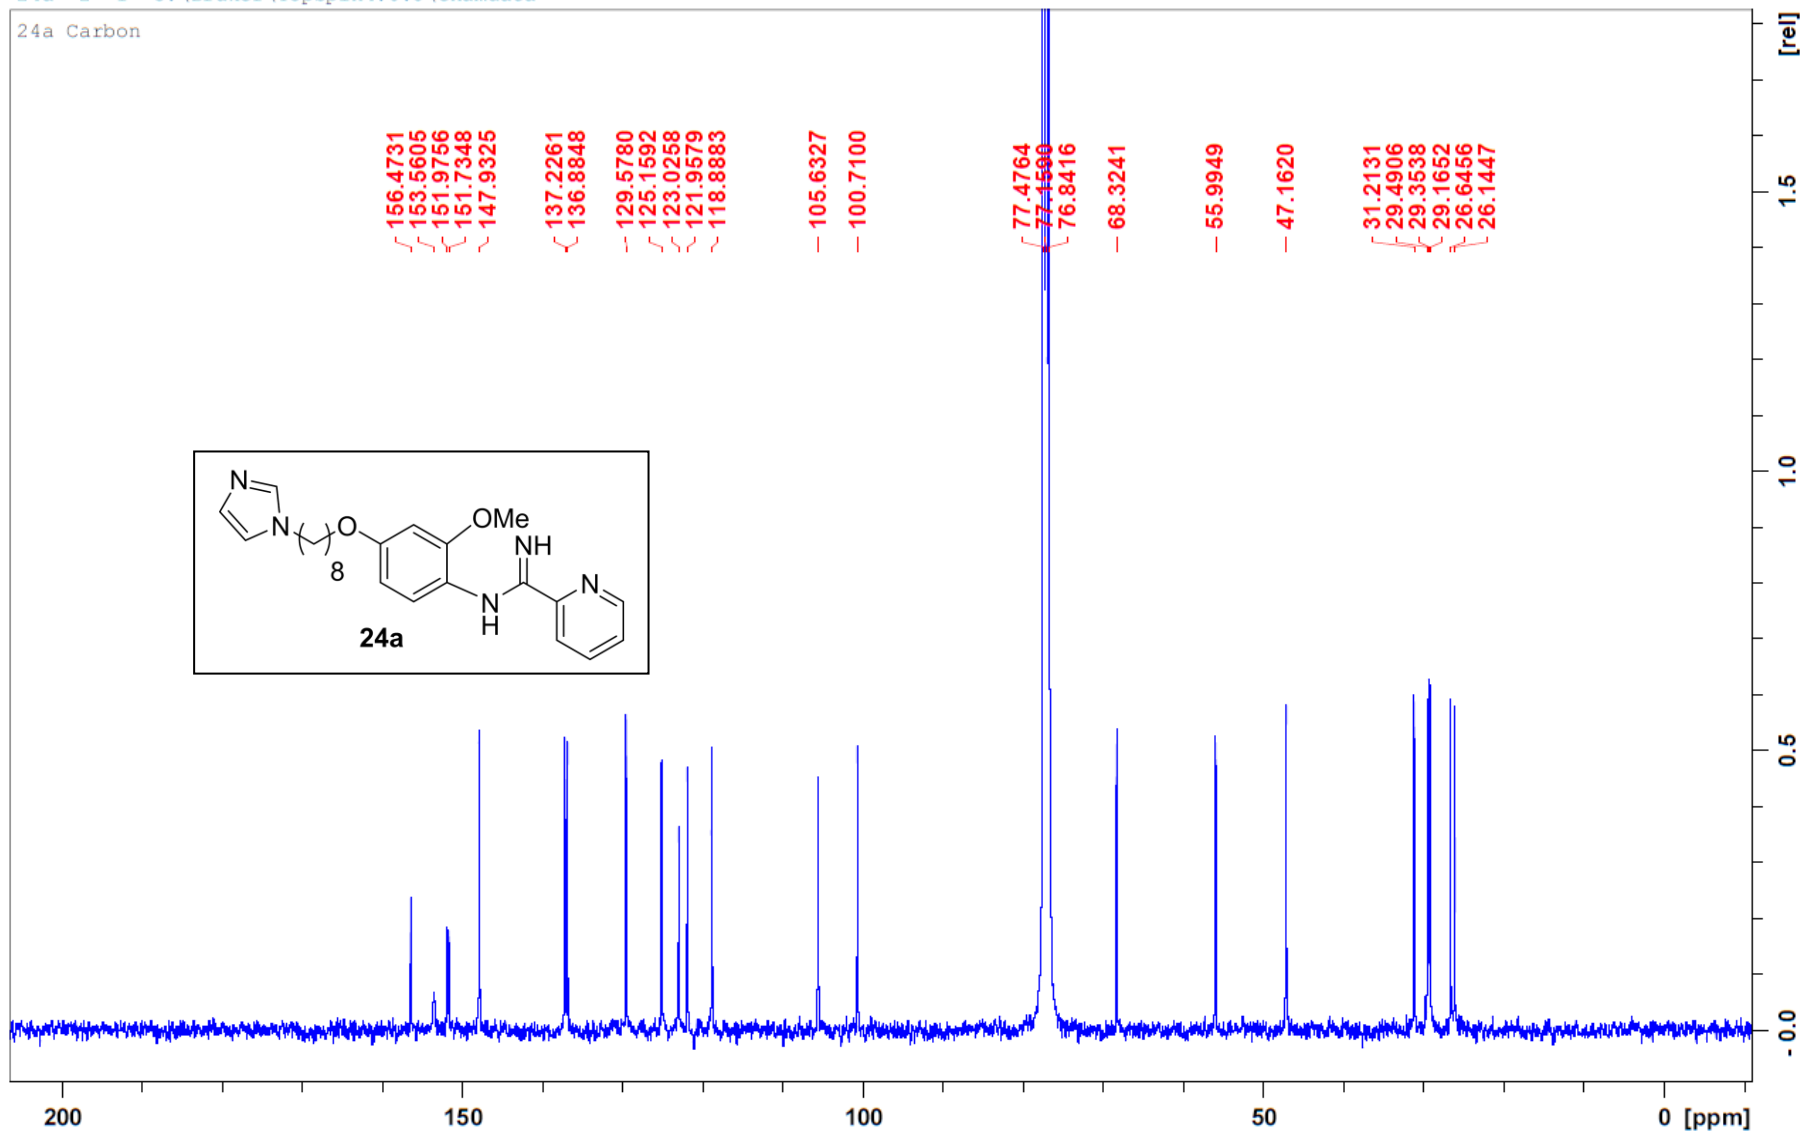

Figure S71.  $^{13}\text{C}$  NMR spectrum of compound 24a (100 MHz,  $\text{CDCl}_3$ ).



24a 2 1 C:\Bruker\TopSpin4.0.8\examdata

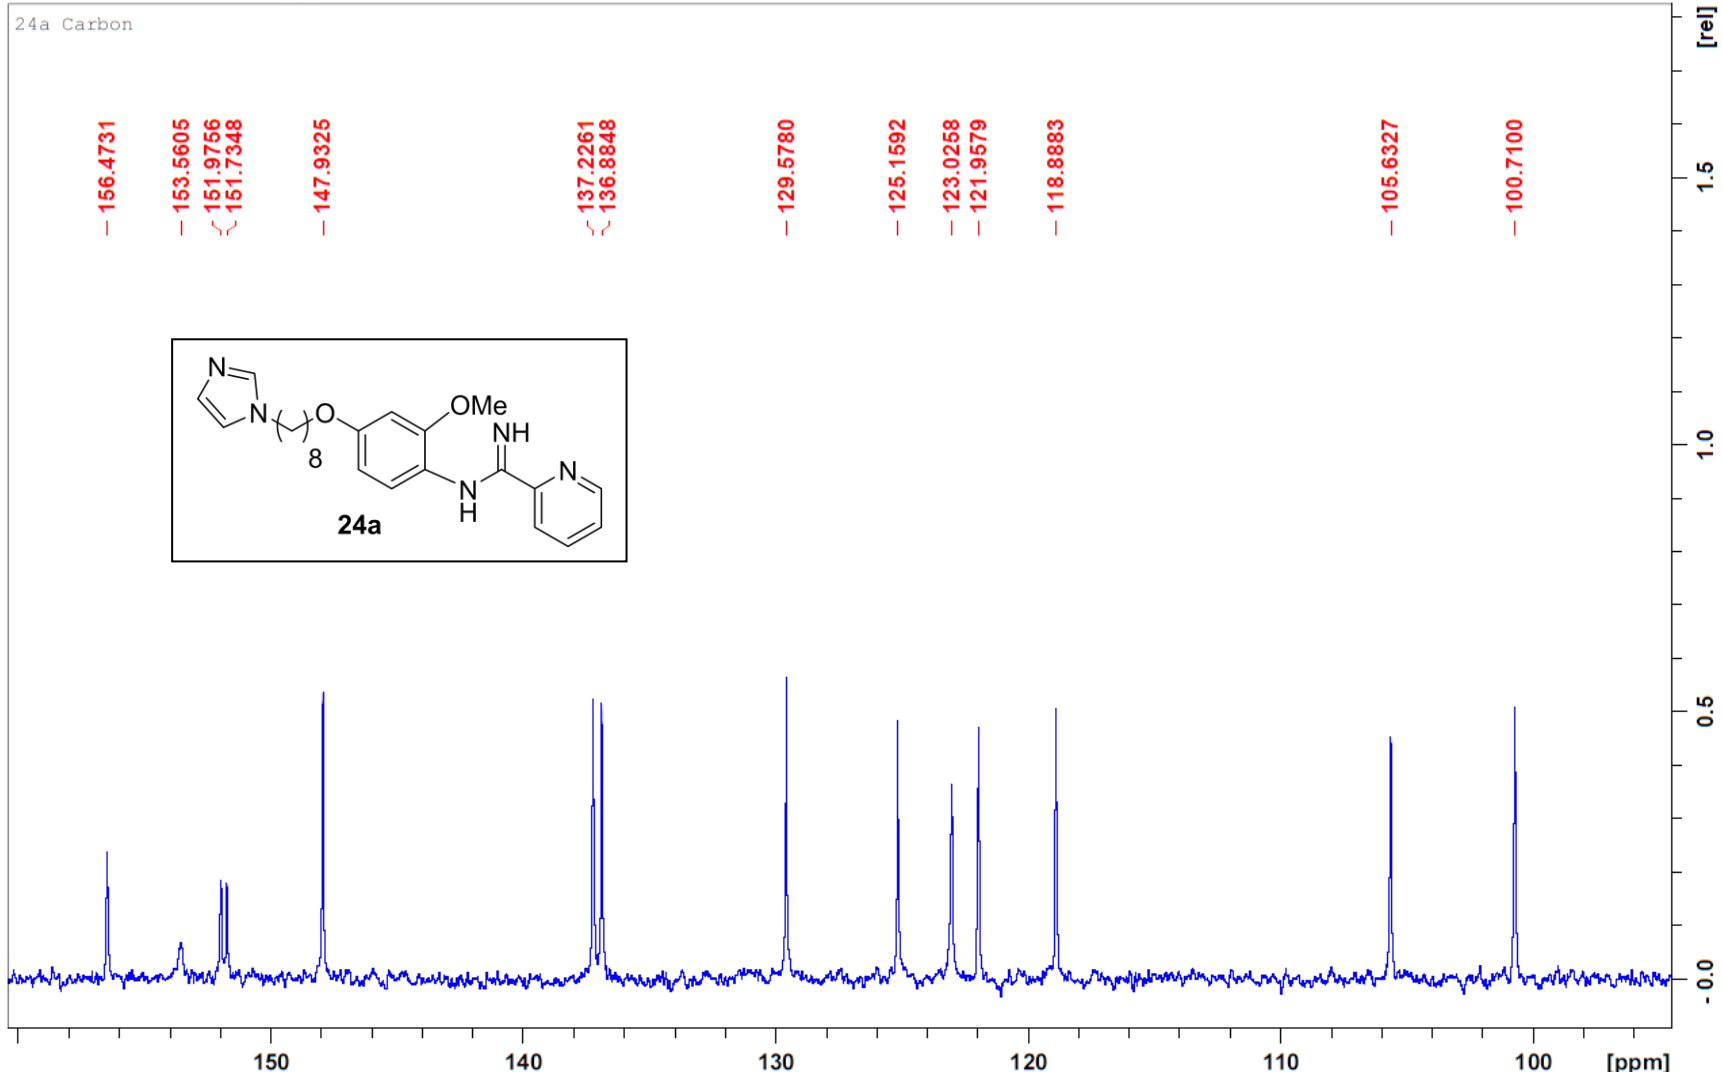

Figure S72. Expanded  $^{13}\text{C}$  NMR spectrum of compound **24a** (100 MHz,  $\text{CDCl}_3$ ).

24b 9 1 C:\Bruker\TopSpin4.0.8\examdata

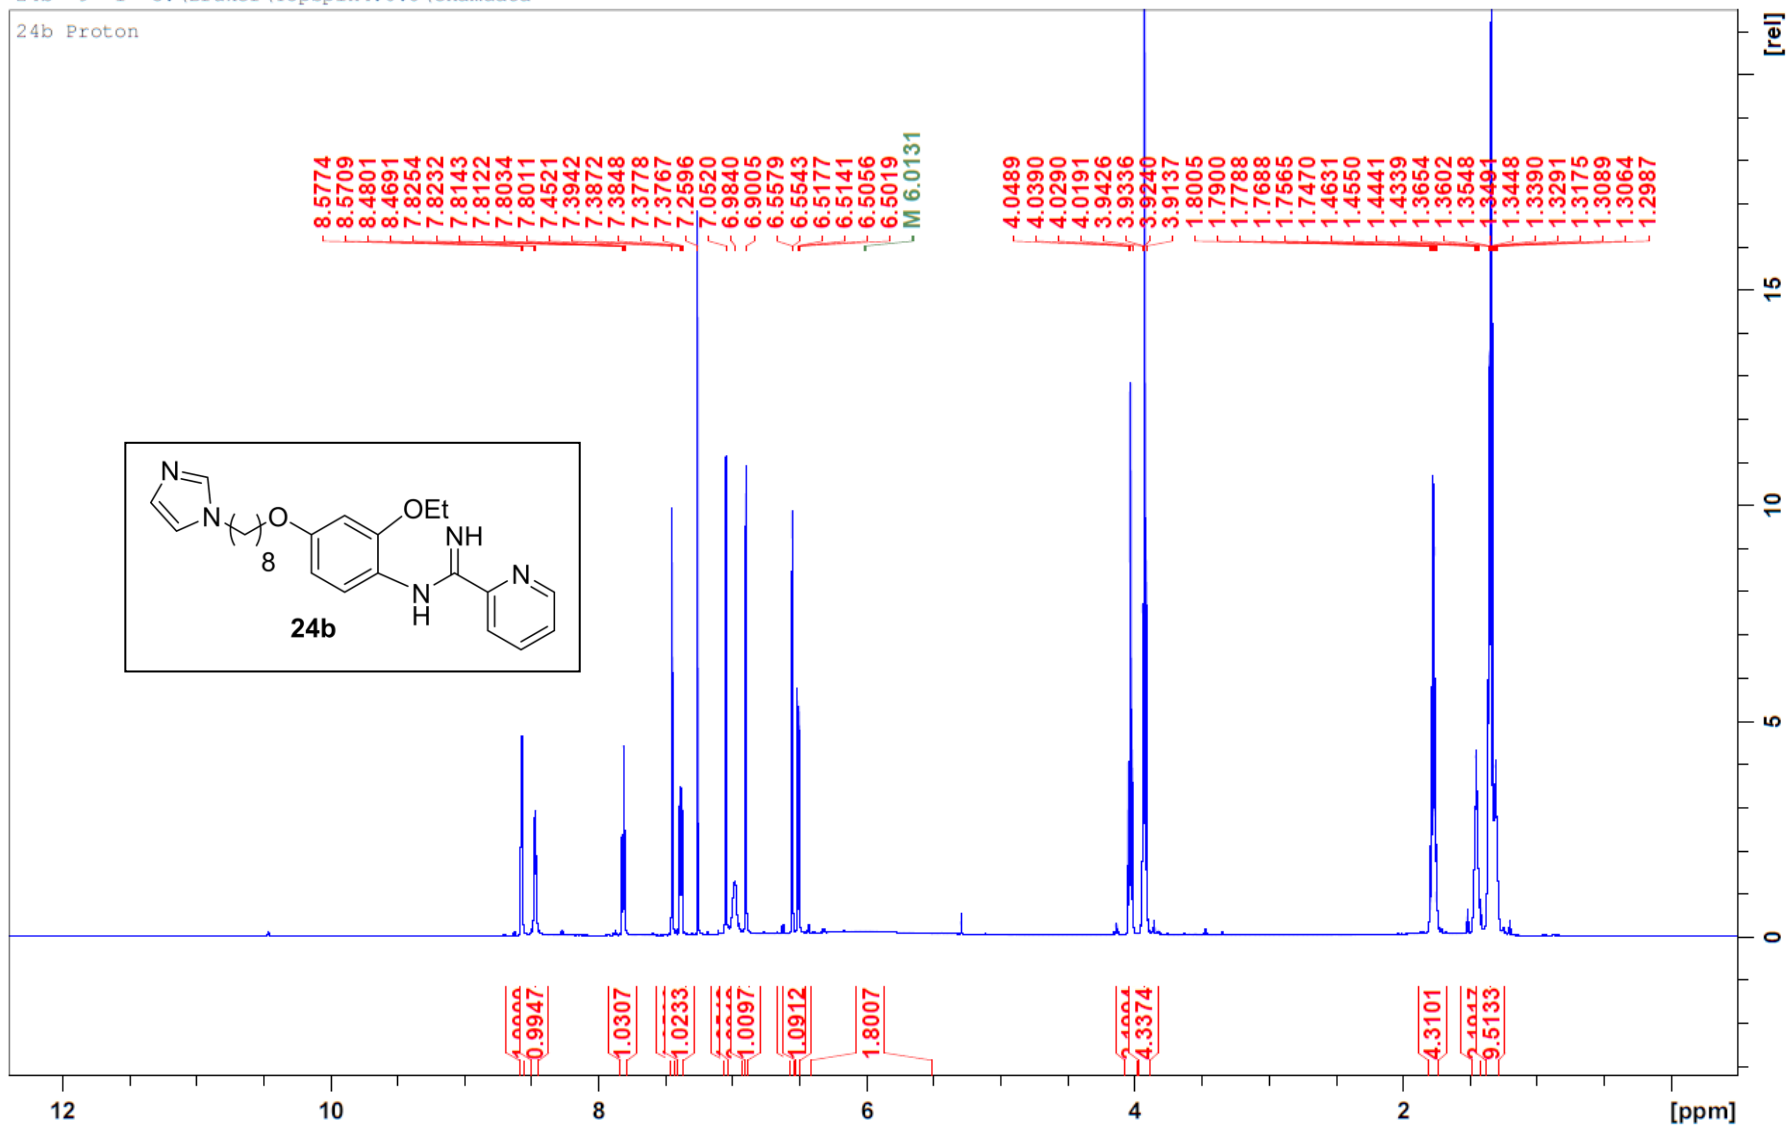

Figure S73.  $^1\text{H}$  NMR spectrum of compound **24b** (700 MHz,  $\text{CDCl}_3$ ).

24b 9 1 C:\Bruker\TopSpin4.0.8\examdata

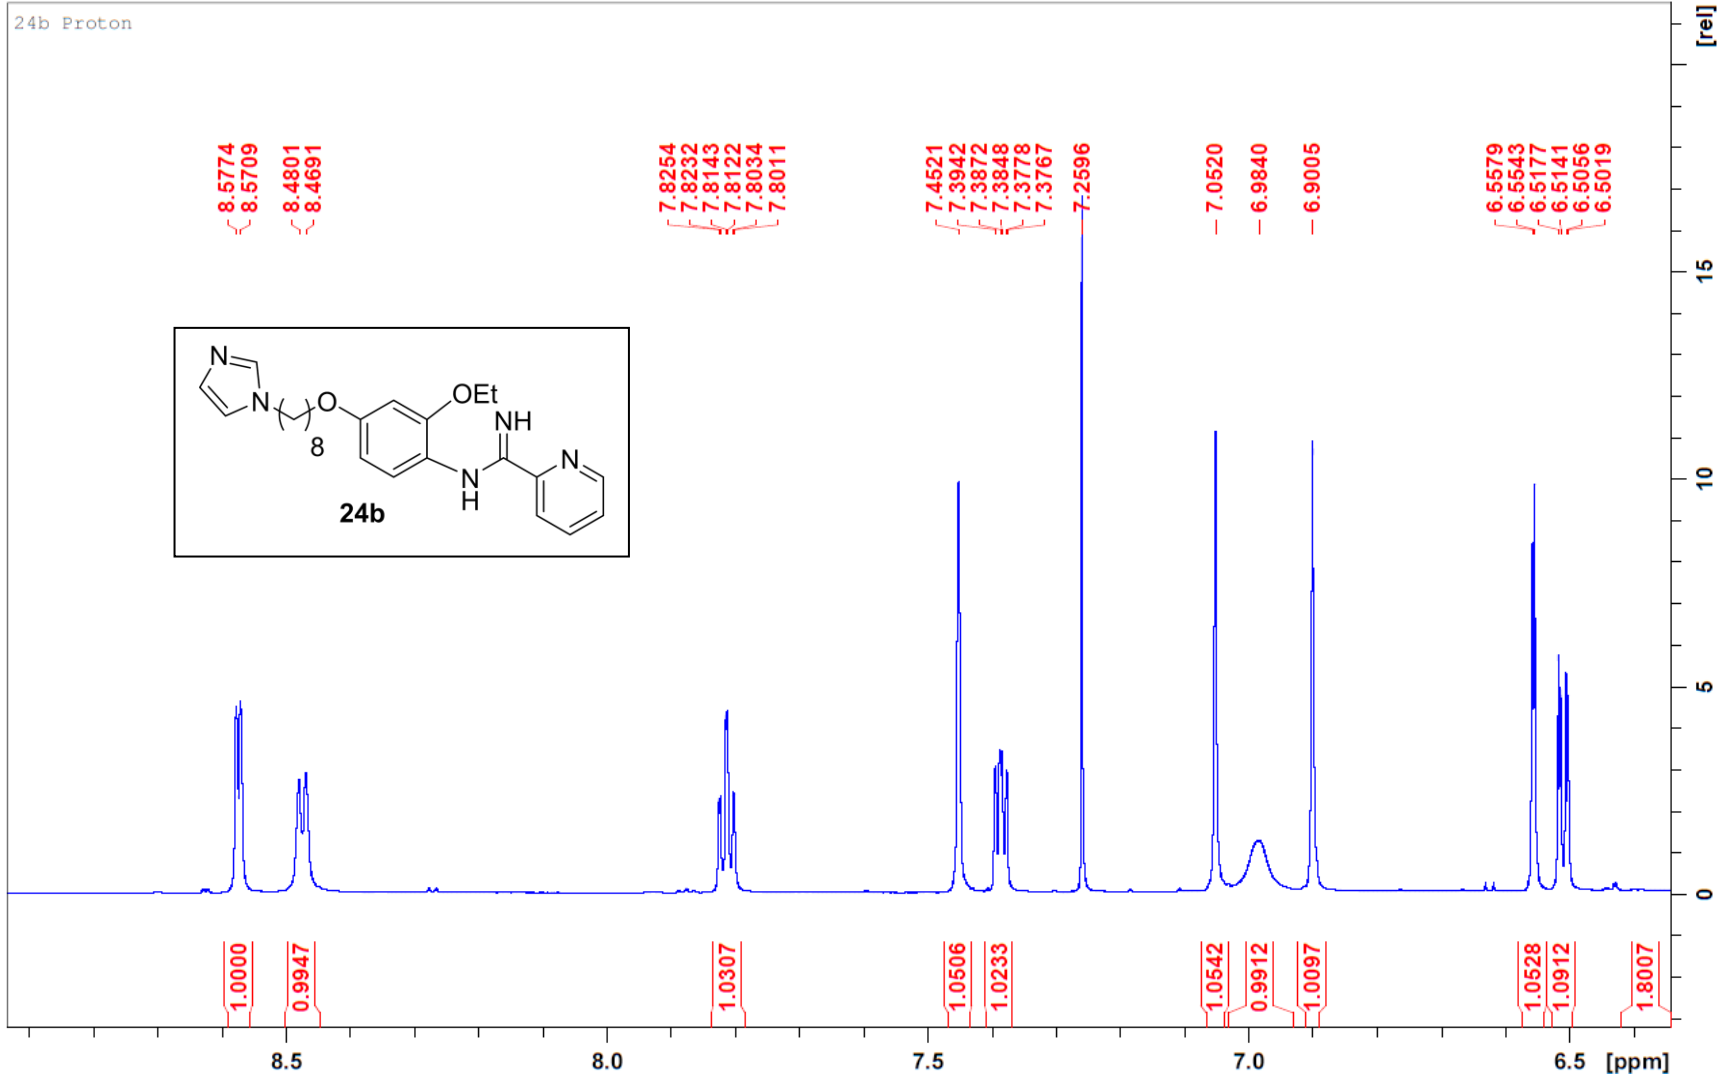

**Figure S74.** Expanded  $^1\text{H}$  NMR spectrum of compound **24b** (700 MHz,  $\text{CDCl}_3$ ).

24b 10 1 C:\Bruker\TopSpin4.0.8\examdata

24b Carbon

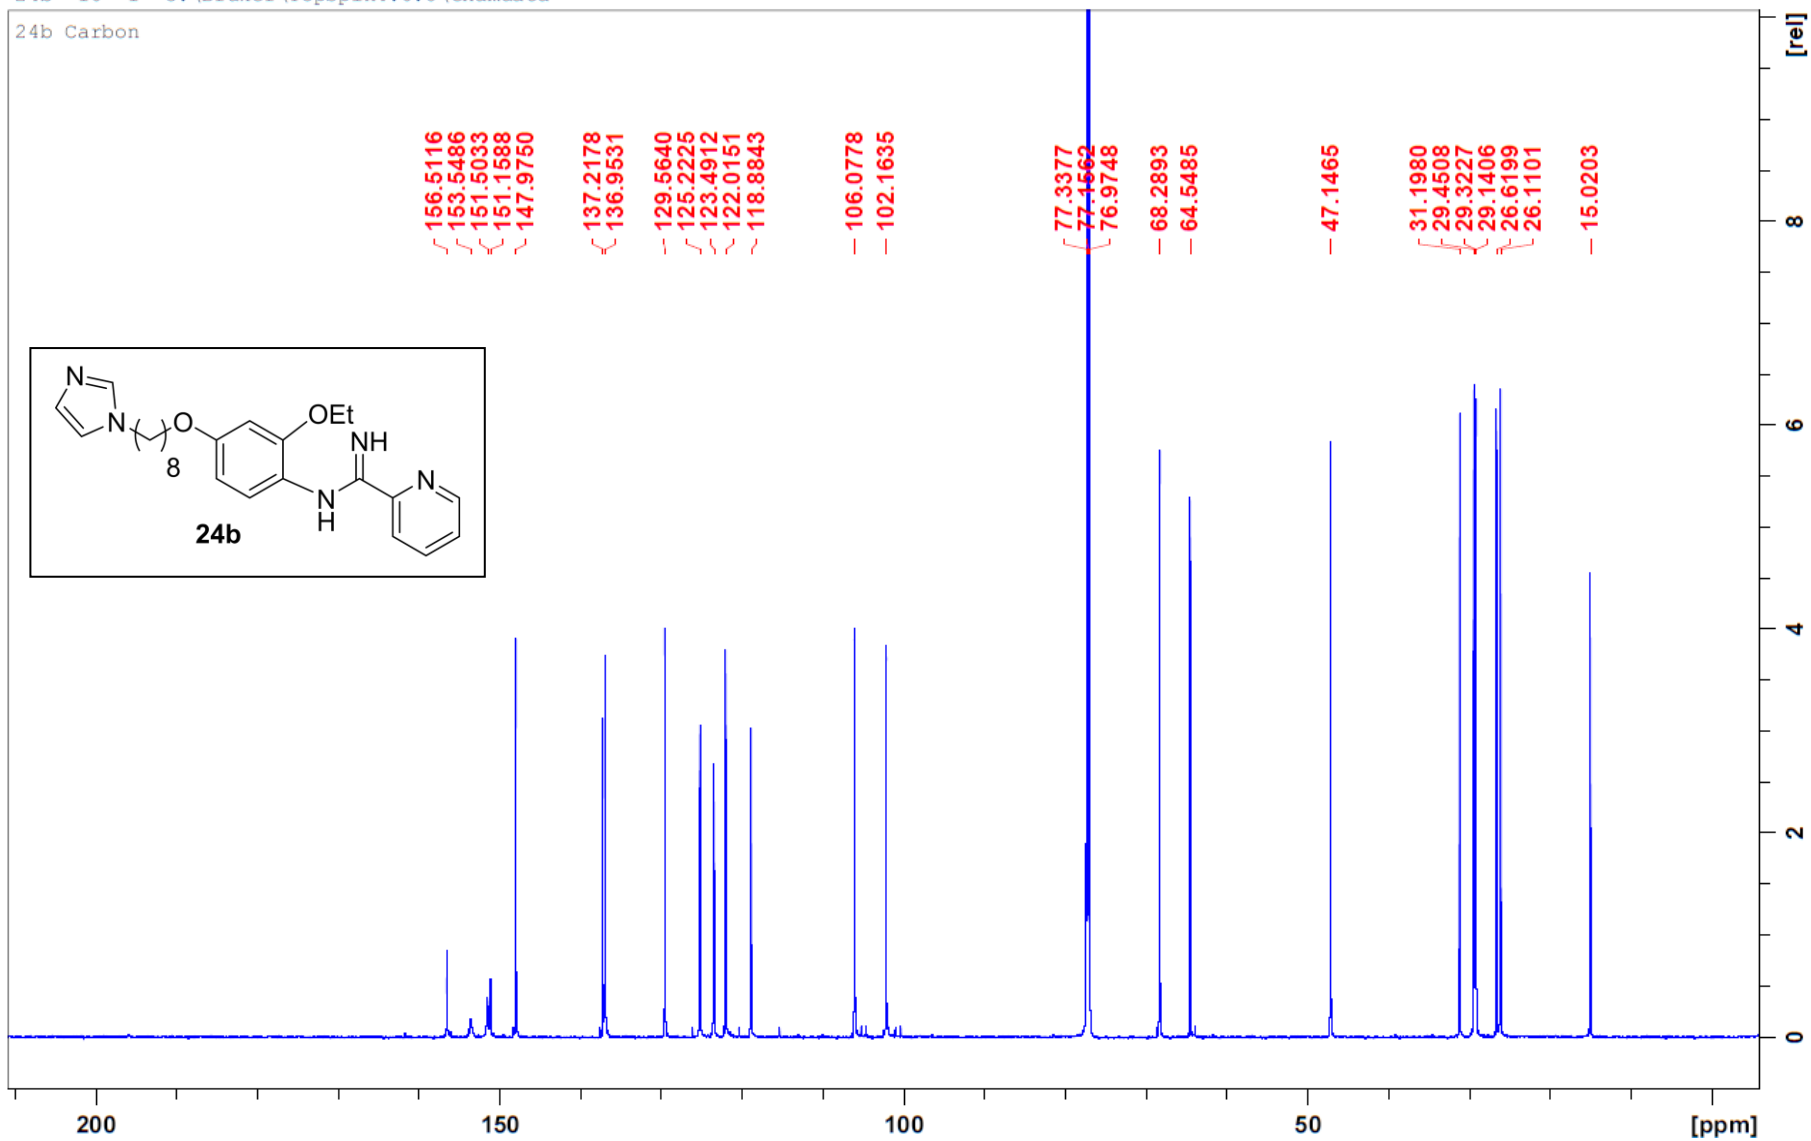

Figure S75. <sup>13</sup>C NMR spectrum of compound **24b** (176 MHz, CDCl<sub>3</sub>).

24b 10 1 C:\Bruker\TopSpin4.0.8\examdata

24b Carbon

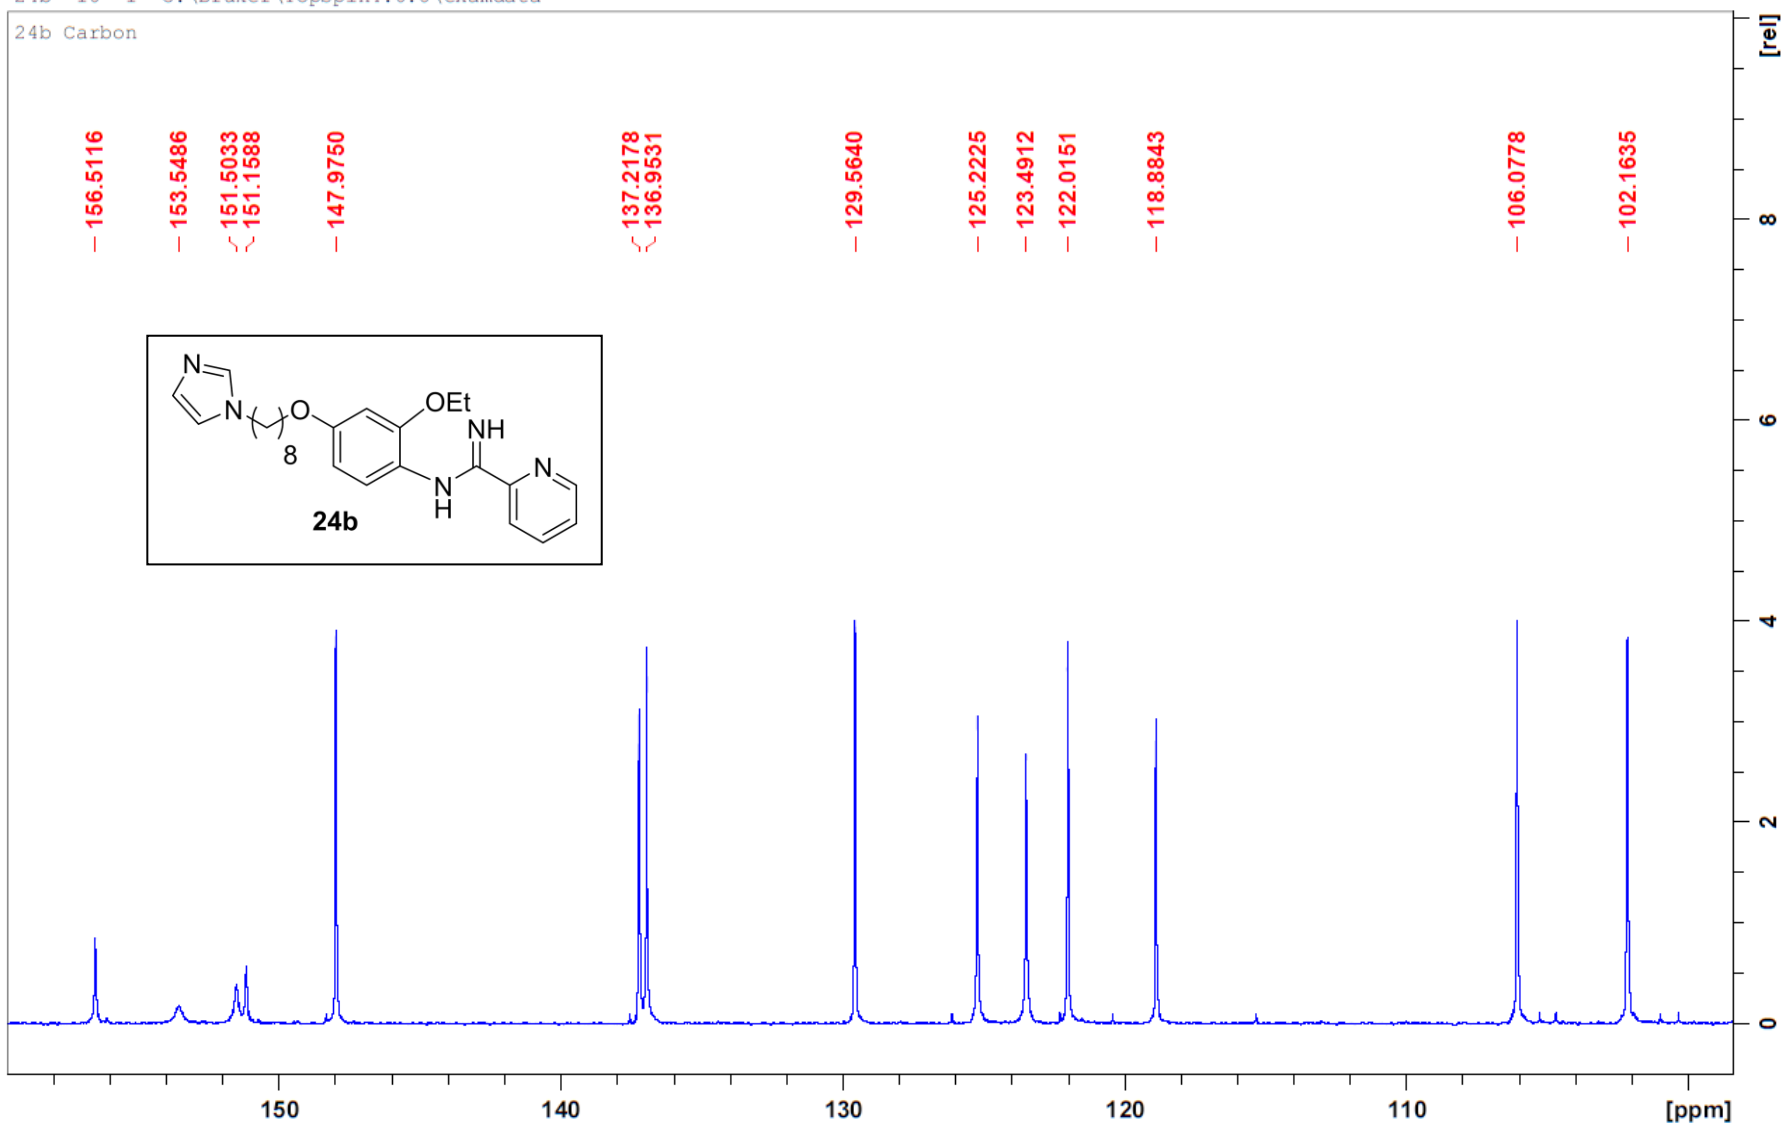

**Figure S76.** Expanded  $^{13}\text{C}$  NMR spectrum of compound **24b** (176 MHz,  $\text{CDCl}_3$ ).

24c 11 1 C:\Bruker\TopSpin4.0.8\examdata

24c Proton

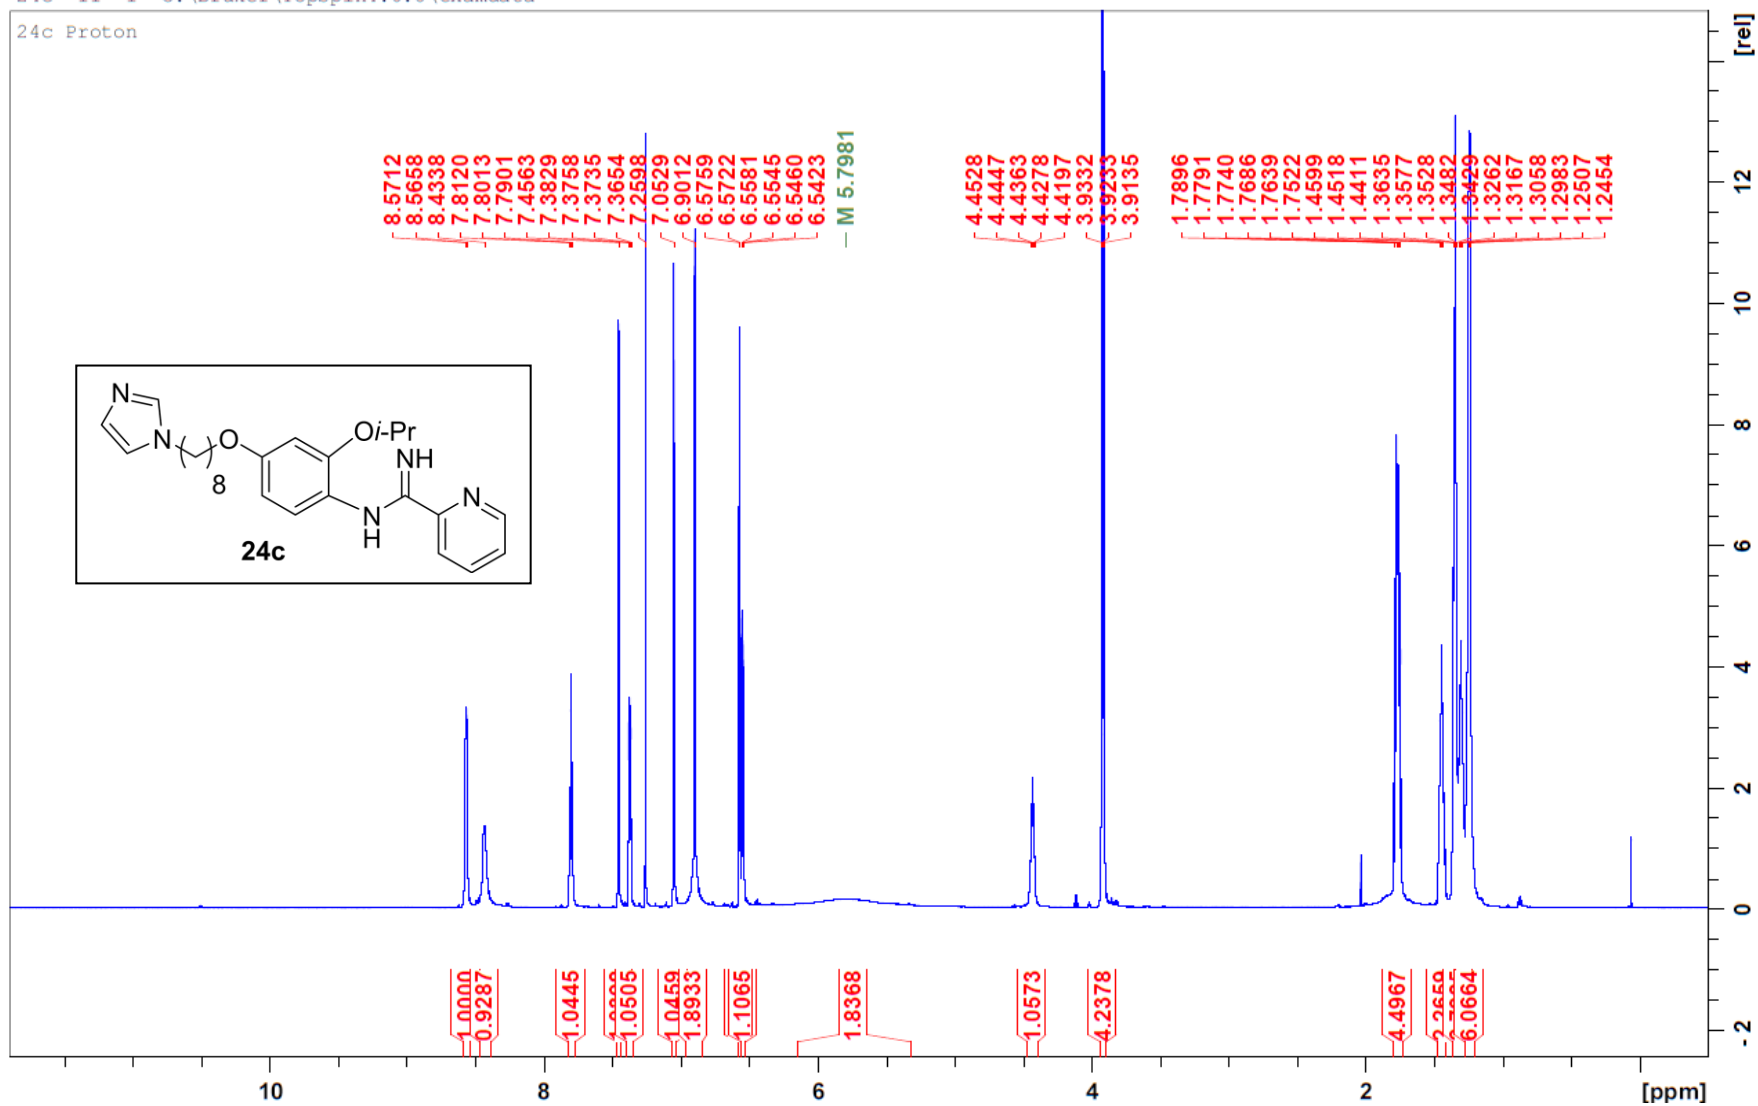

Figure S77.  $^1\text{H}$  NMR spectrum of compound **24c** (700 MHz,  $\text{CDCl}_3$ ).

24c 11 1 C:\Bruker\TopSpin4.0.8\examdata

24c Proton

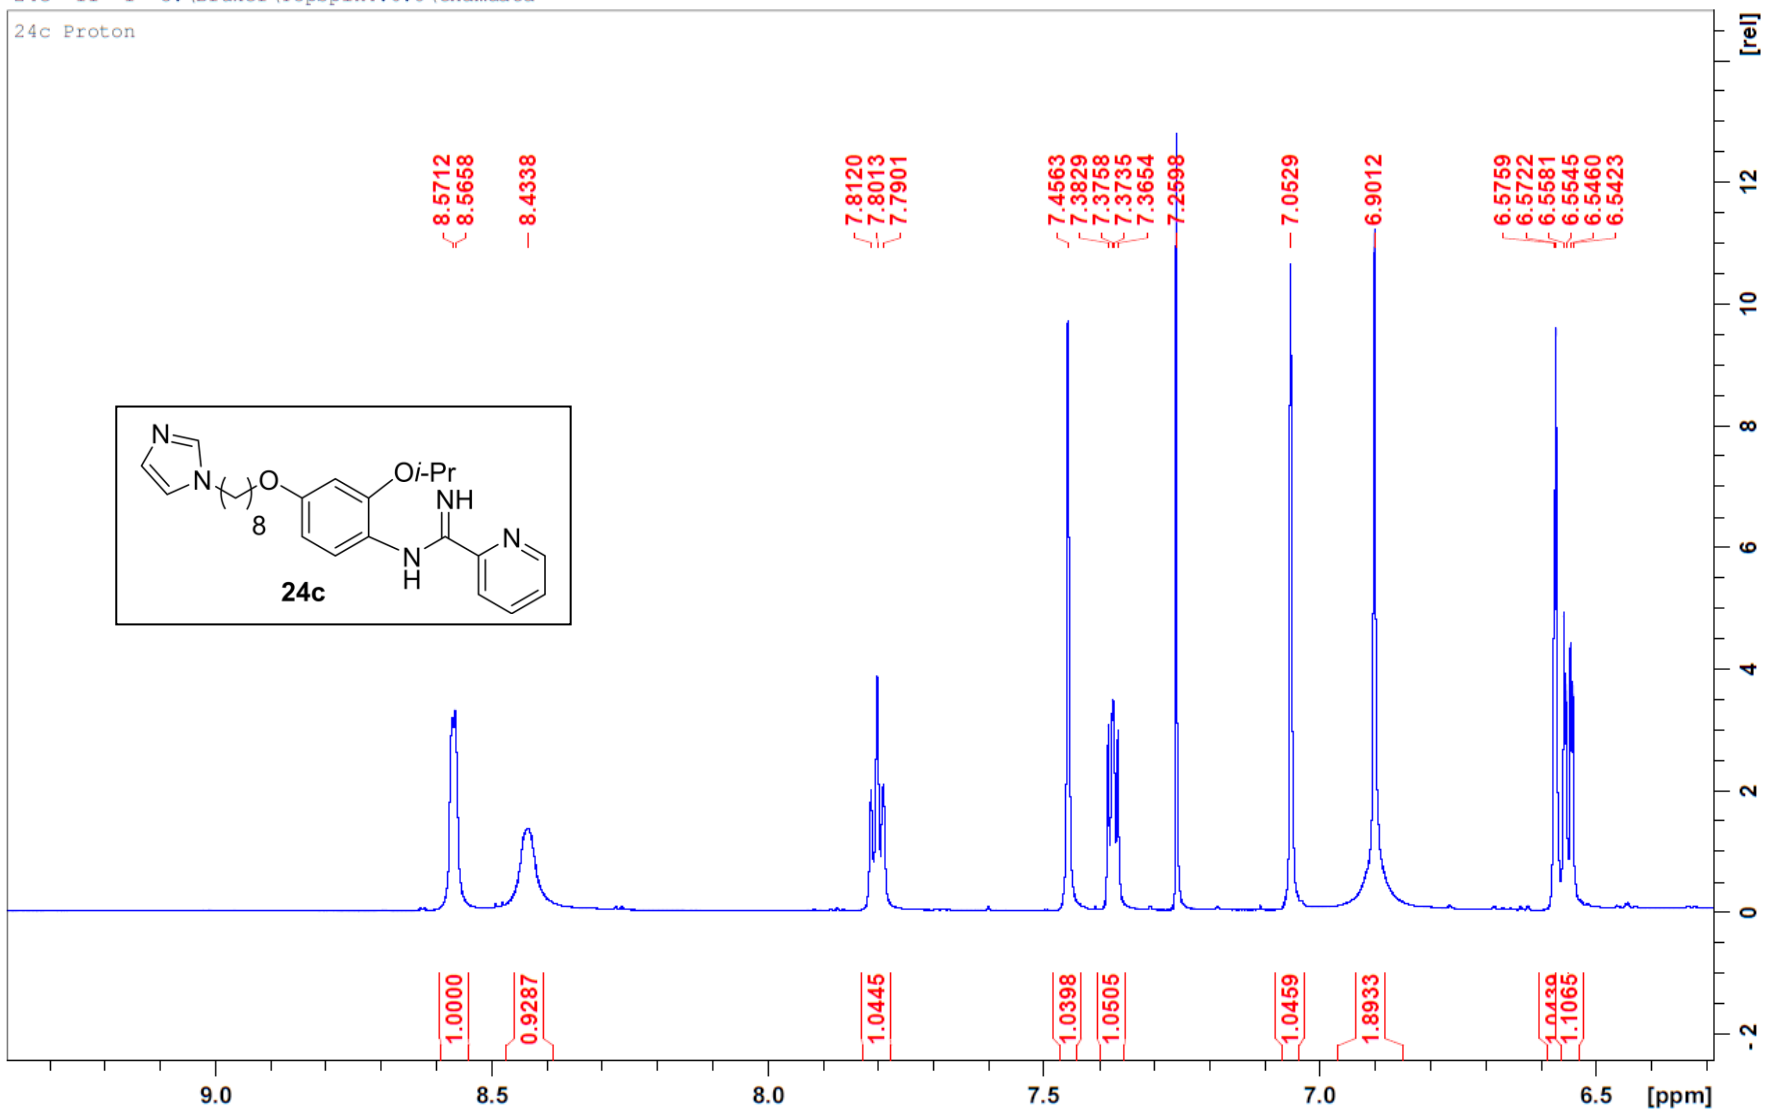

**Figure S78.** Expanded <sup>1</sup>H NMR spectrum of compound **24c** (700 MHz, CDCl<sub>3</sub>).

24c 12 1 C:\Bruker\TopSpin4.0.8\examdata

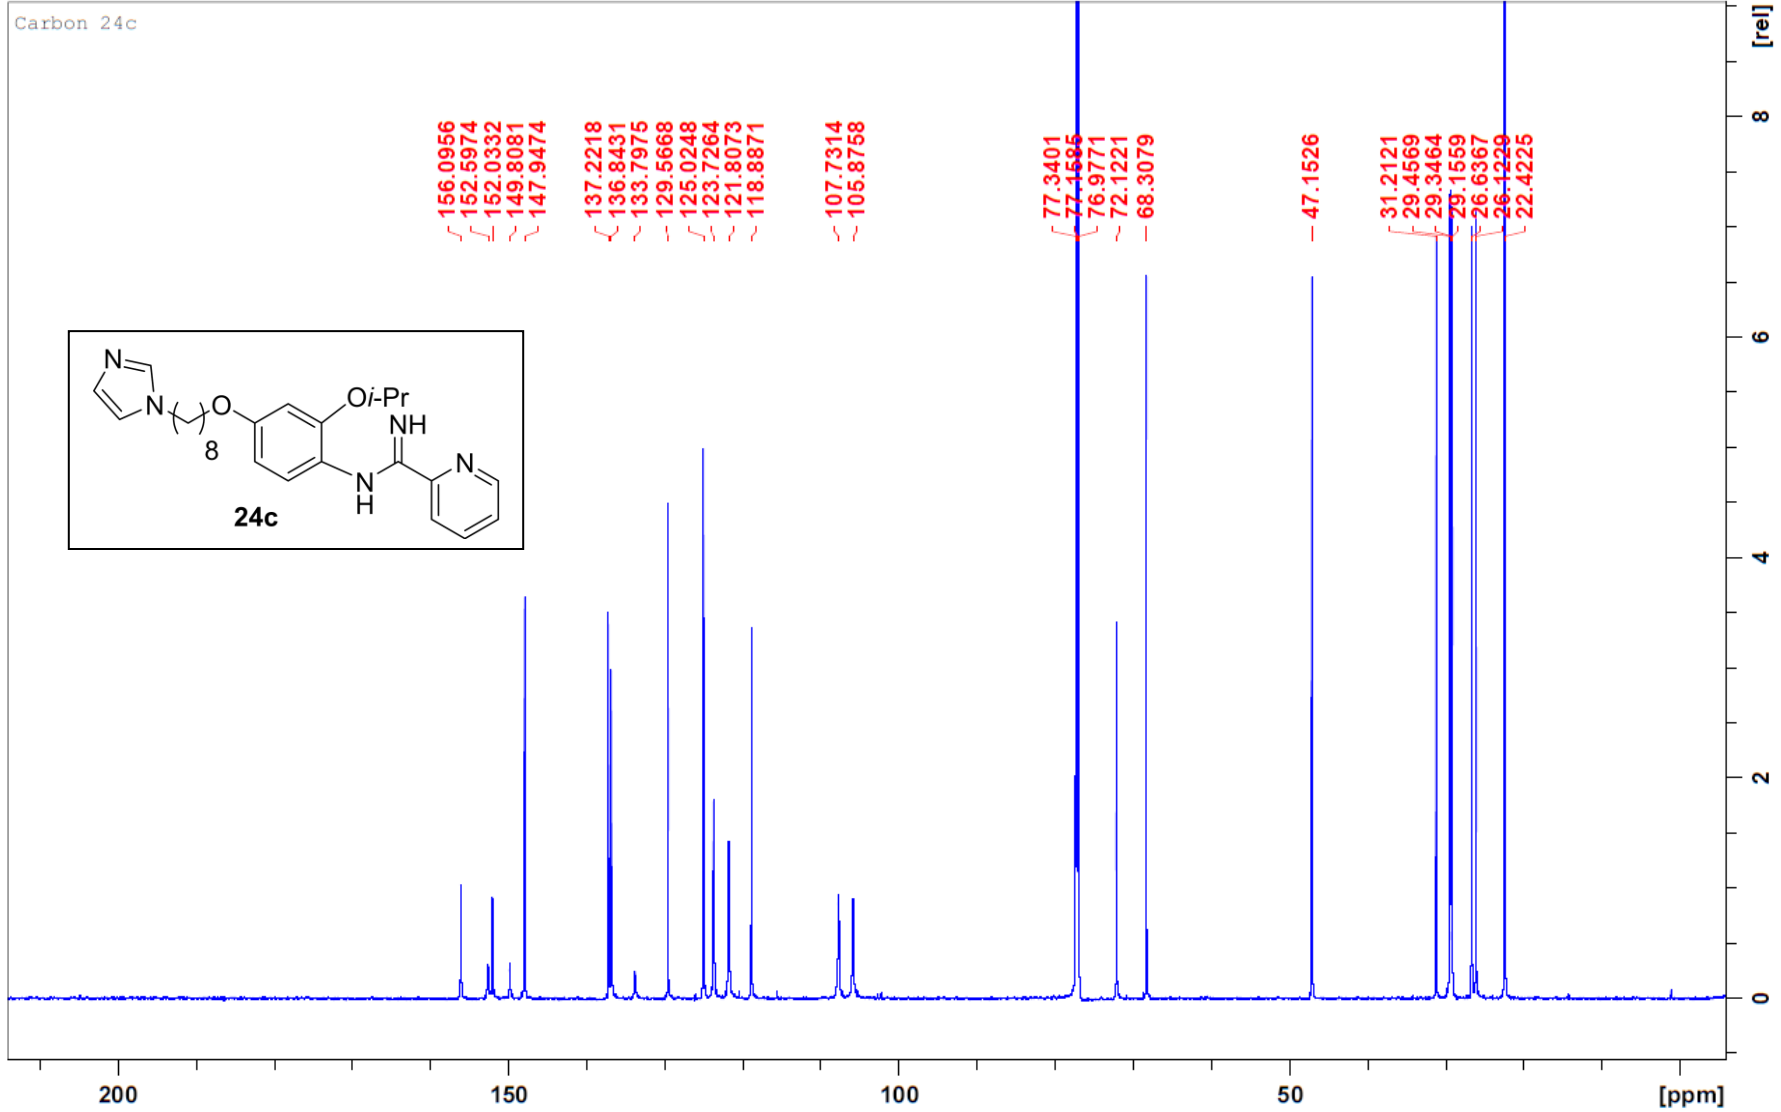

Figure S79.  $^{13}\text{C}$  NMR spectrum of compound **24c** (176 MHz,  $\text{CDCl}_3$ ).



24c 12 1 C:\Bruker\TopSpin4.0.8\examdata

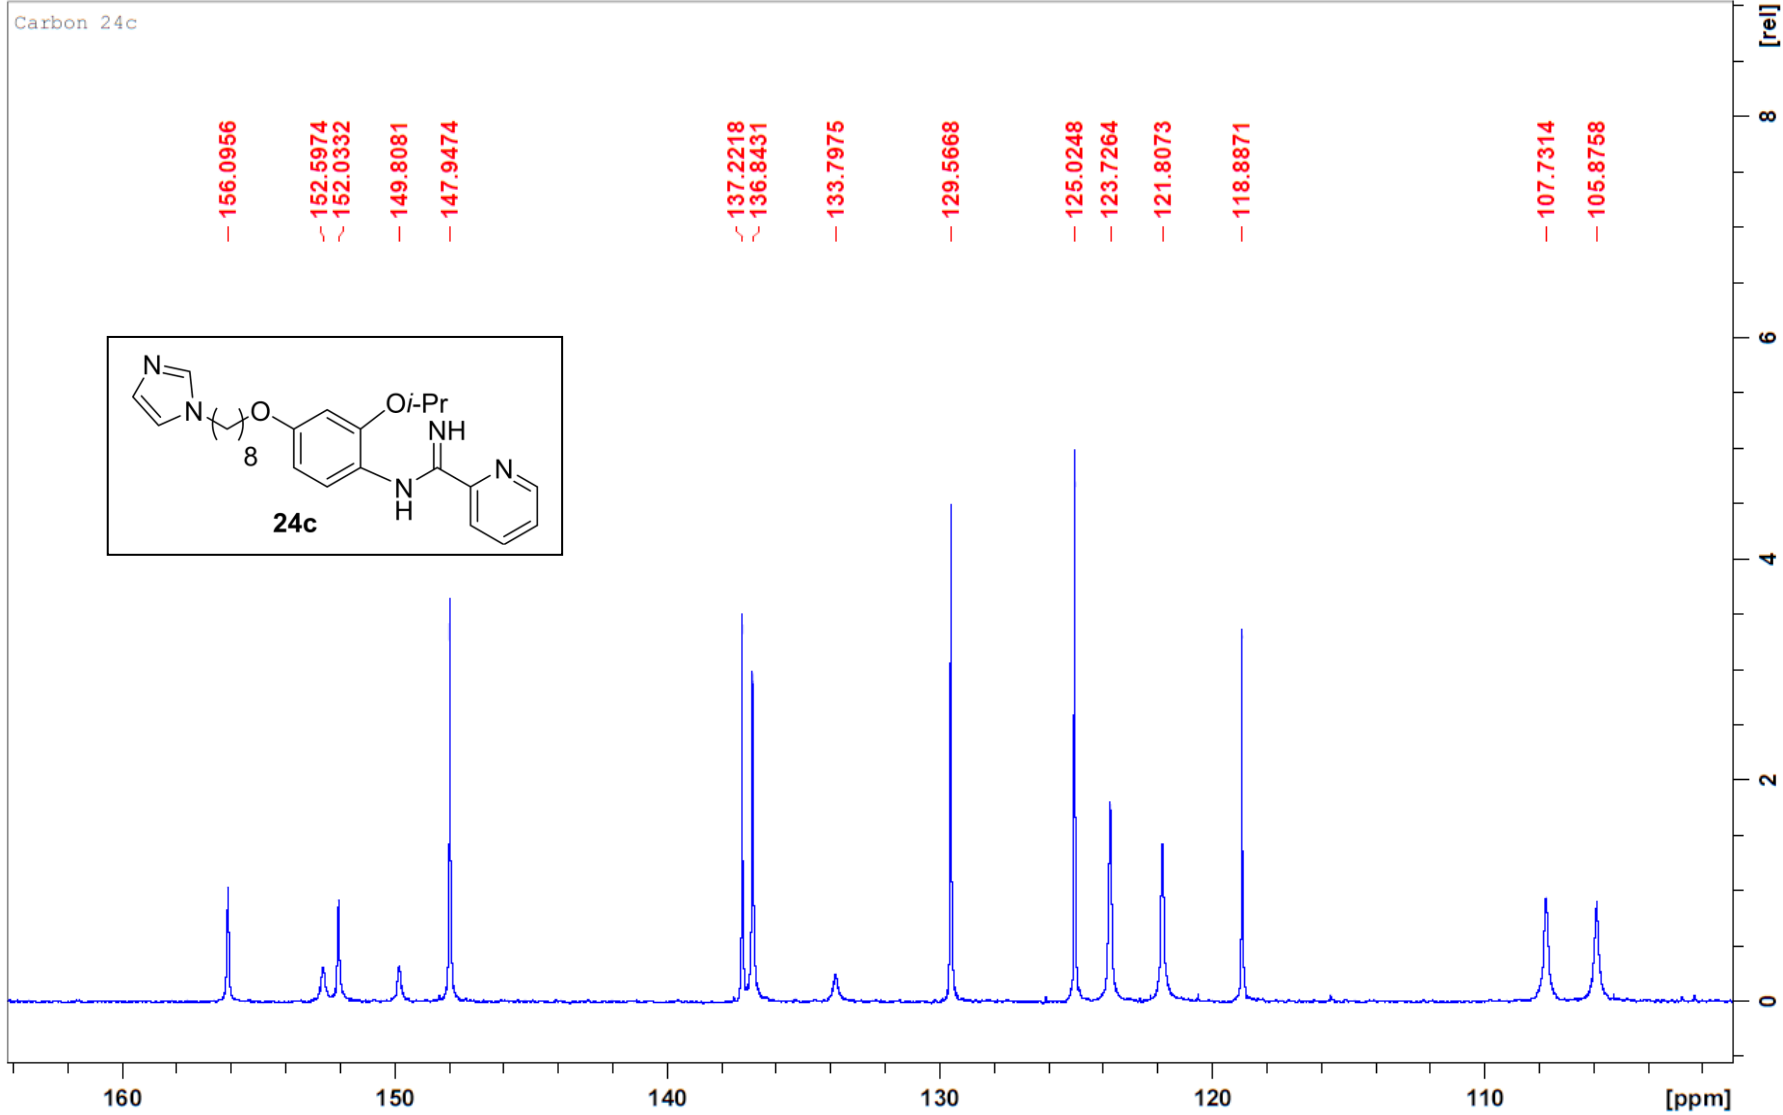

Figure S80. Expanded  $^{13}\text{C}$  NMR spectrum of compound **24c** (176 MHz,  $\text{CDCl}_3$ ).

28 5 1 C:\Bruker\TopSpin4.0.9\examdata

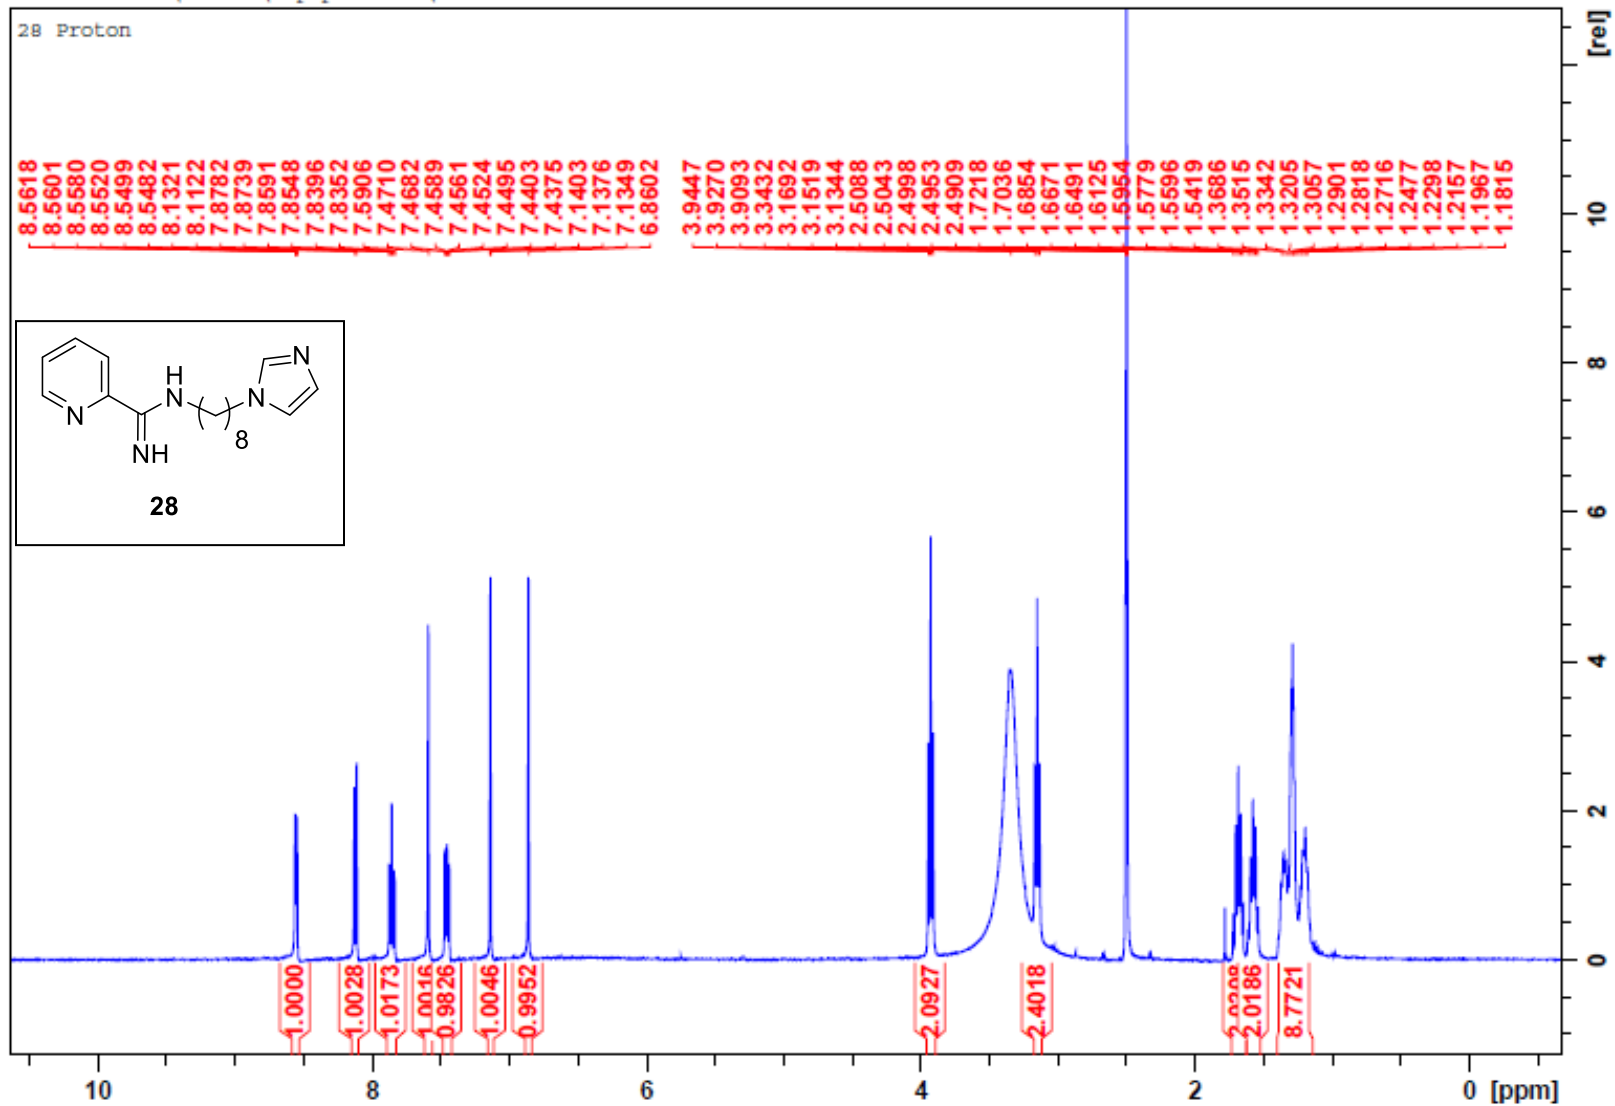

Figure S81.  $^1\text{H}$  NMR spectrum of compound **28** (400 MHz,  $\text{DMSO-d}_6$ )

28 5 1 C:\Bruker\TopSpin4.0.9\examdata

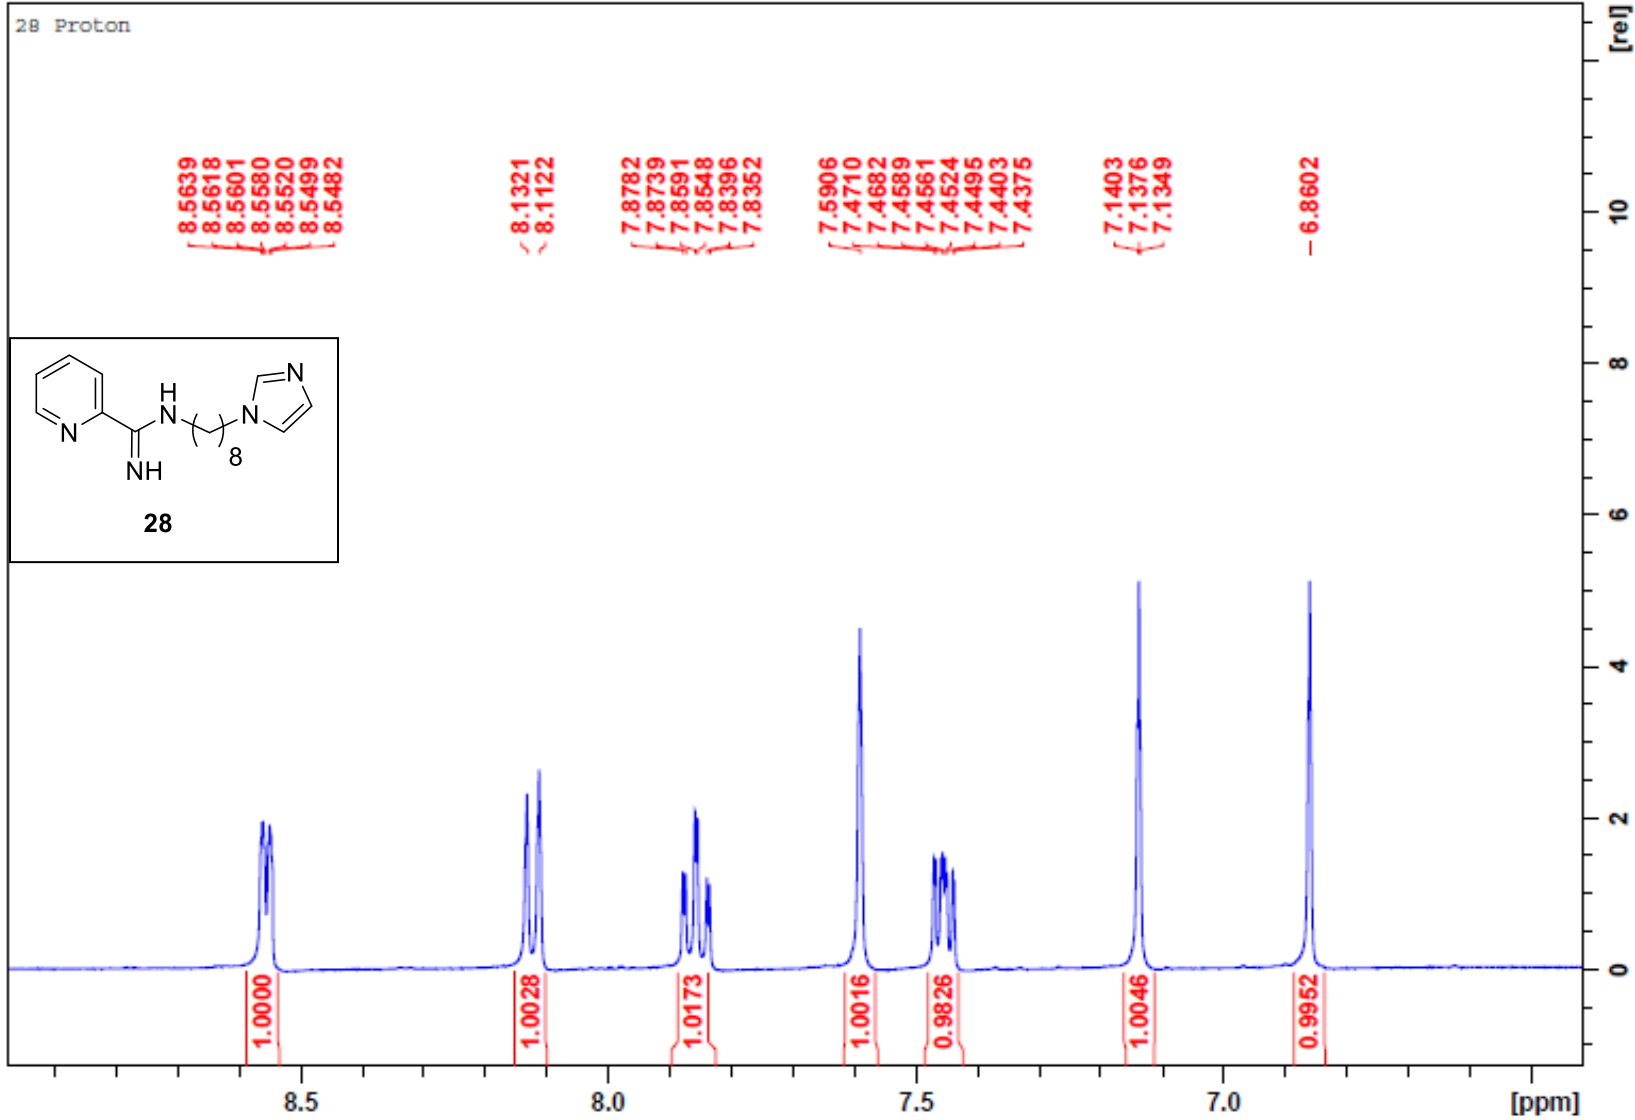

Figure S82. Expanded  $^1\text{H}$  NMR spectrum of compound **28** (400 MHz,  $\text{DMSO-d}_6$ )

28 6 1 C:\Bruker\TopSpin4.0.9\examdata

28 Carbon

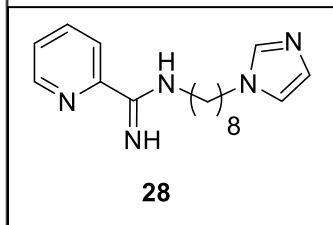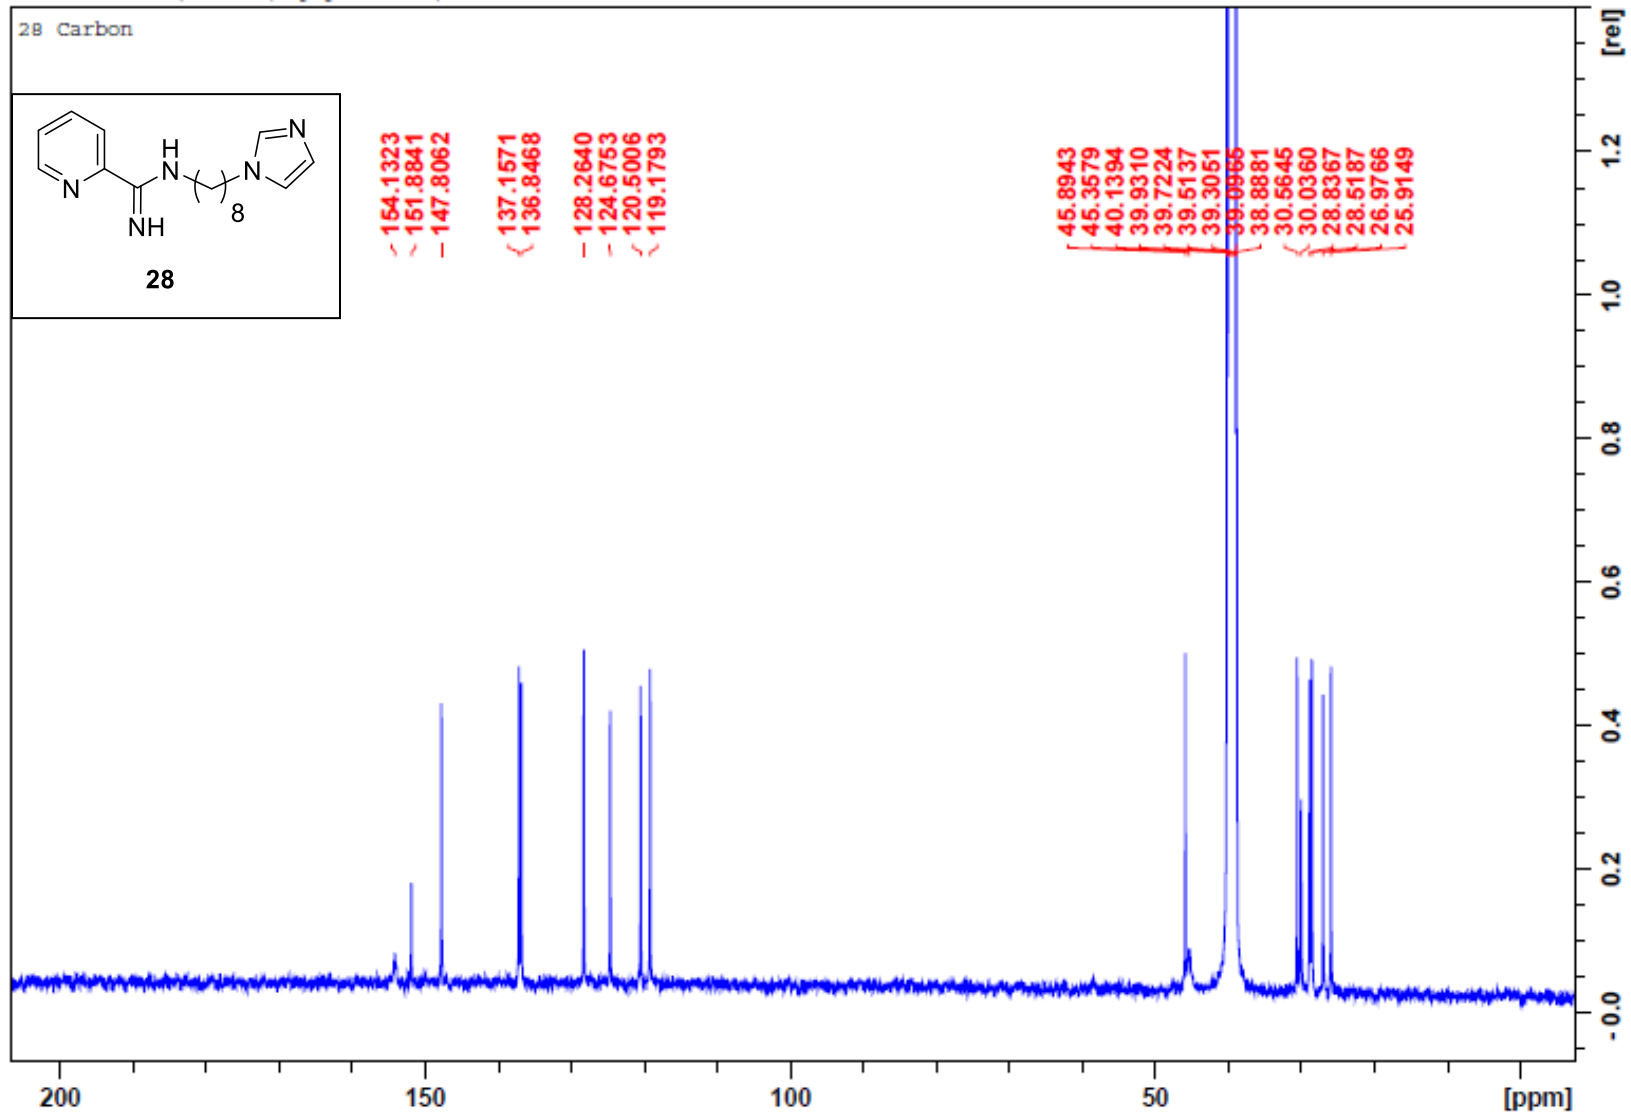

**Figure S83.** <sup>13</sup>C NMR spectrum of compound **28** (100 MHz, DMSO-d<sub>6</sub>)

28 6 1 C:\Bruker\TopSpin4.0.9\examdata

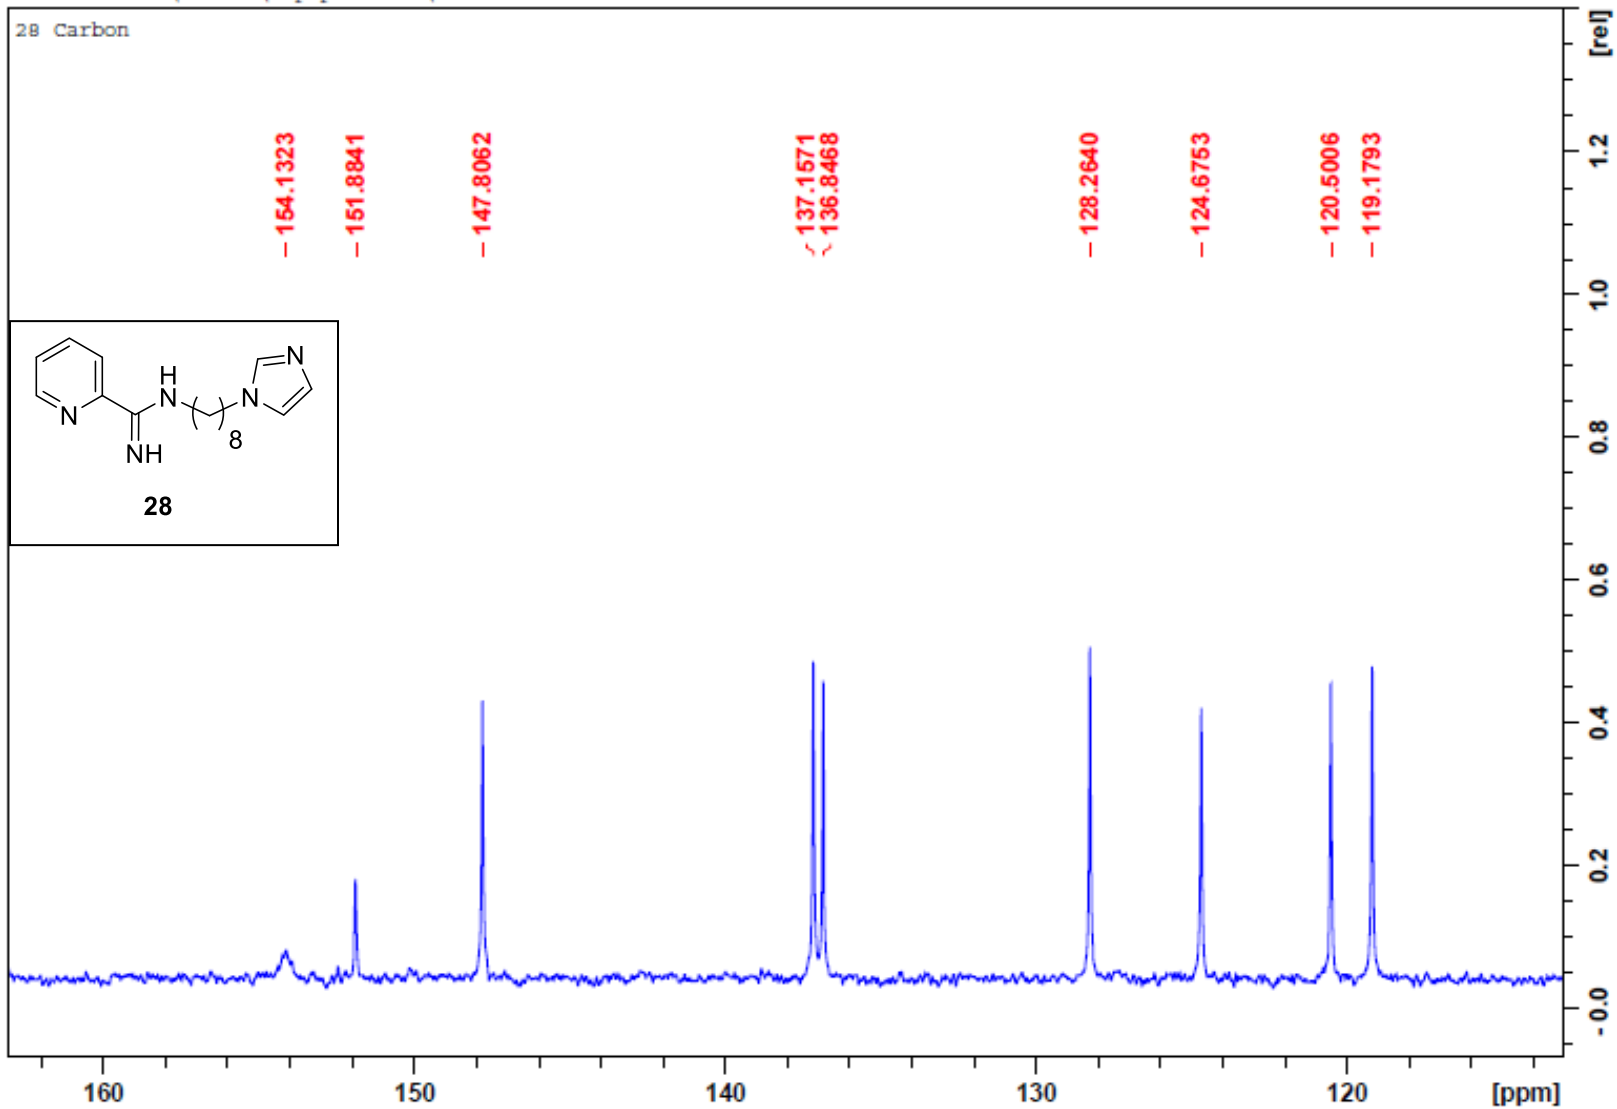

**Figure S84.** Expanded  $^{13}\text{C}$  NMR spectrum of compound **28** (100 MHz,  $\text{DMSO-d}_6$ )
